# Supplementary material for: PheWAS and cross-disorder analysis reveal genetic architecture, pleiotropic loci and phenotypic correlations across 11 autoimmune disorders
Source: Front Immunol. 2023 Sep 21;14:1147573. doi: 10.3389/fimmu.2023.1147573 (PMC10552152; doi:10.3389/fimmu.2023.1147573)
Supplement: Supplementary Table 1 — Demographic information of the 330,841 UK Biobank participants included in the analysis. The ICD10 Disease Diagnoses category includes the diagnoses for the autoimmune disorders that are included in this study and were present in the UK Biobank. [file Table_1.xlsx]

## Sheet: VITL
varName	beta noHLA	lower noHLA	upper noHLA	Pfdr noHLA	category2	category1	ID code	category3	Pfrd HLA	beta HLA	lower HLA	upper HLA
Vascular/heart problems diagnosed by doctor	0.0155667	0.00780699	0.0233262	0.00915373	Medical conditions	health and medical history	6150#100	general	0.991238	0.000267442	-0.0074906	0.0080275
Vascular/heart problems diagnosed by doctor: High blood pressure	-0.0153159	-0.0232244	-0.00740705	0.0151535	Medical conditions	health and medical history	6150#4	general	0.989871	-0.000357322	-0.00826718	0.00755005
Number of self-reported non-cancer illnesses	0.00574098	-0.000741871	0.0122238	0.671755	Medical conditions	health and medical history	135	general	0.84854	0.00264235	-0.00384039	0.00912508
Blood clot, DVT, bronchitis, emphysema, asthma, rhinitis, eczema, allergy diagnosed by doctor: Blood clot in the leg (DVT)	0.018582	-0.00553297	0.0427146	0.788479	Medical conditions	health and medical history	6152#5	general	0.537644	-0.0199183	-0.044111	0.00422077
Blood clot, DVT, bronchitis, emphysema, asthma, rhinitis, eczema, allergy diagnosed by doctor: Asthma	0.00641189	-0.00425742	0.0170842	0.830505	Medical conditions	health and medical history	6152#8	general	0.0347495	-0.0177735	-0.0284685	-0.00708725
Blood clot, DVT, bronchitis, emphysema, asthma, rhinitis, eczema, allergy diagnosed by doctor	-0.0023106	-0.00962844	0.00500658	0.947491	Medical conditions	health and medical history	6152#100	general	0.00557512	0.0143838	0.00706157	0.0217082
Blood clot, DVT, bronchitis, emphysema, asthma, rhinitis, eczema, allergy diagnosed by doctor: Emphysema/chronic bronchitis	0.0036201	-0.023618	0.0308806	0.973559	Medical conditions	health and medical history	6152#6	general	0.881336	0.00909805	-0.0181443	0.0362704
Blood clot, DVT, bronchitis, emphysema, asthma, rhinitis, eczema, allergy diagnosed by doctor: Hayfever, allergic rhinitis or eczema	-0.00107152	-0.00919144	0.00704949	0.973559	Medical conditions	health and medical history	6152#9	general	0.0108386	-0.0151051	-0.0232381	-0.00697578
Histology of cancer tumour: Basal cell carcinoma, NOS	-0.110243	-0.126724	-0.093757	1.92028e-36	Cancer register	health and medical history	40011#8090	Epithelial	3.91718e-23	-0.0891989	-0.105945	-0.0724774
Behaviour of cancer tumour: Malignant, primary site	-0.0473731	-0.0569684	-0.0377771	2.12554e-19	Cancer register	health and medical history	40012#3	general	4.52796e-12	-0.0375297	-0.0471713	-0.0278948
Cancer code, self-reported: malignant melanoma	-0.15801	-0.196027	-0.119945	1.703e-13	Medical conditions	health and medical history	20001#1059	Skin Cancer	5.77311e-06	-0.107841	-0.146795	-0.0690152
Cancer code, self-reported: basal cell carcinoma	-0.133365	-0.168542	-0.0981479	4.3627e-11	Medical conditions	health and medical history	20001#1061	Skin Cancer	2.47425e-05	-0.0939902	-0.129915	-0.0581766
Histology of cancer tumour: Superficial spreading melanoma	-0.148271	-0.192661	-0.103813	1.98317e-08	Cancer register	health and medical history	40011#8743	Epithelial	5.77311e-06	-0.126104	-0.171699	-0.0806801
Histology of cancer tumour: Malignant melanoma, NOS	-0.154481	-0.20656	-0.102305	1.54114e-06	Cancer register	health and medical history	40011#8720	Hematologic	0.00331752	-0.108783	-0.162218	-0.0555873
Histology of cancer tumour: Squamous cell carcinoma	-0.0793466	-0.106867	-0.051803	3.72179e-06	Cancer register	health and medical history	40011#8070	Epithelial	0.0329877	-0.0465309	-0.0743691	-0.0187627
Number of self-reported cancers	-0.0344318	-0.0467528	-0.0221109	9.38738e-06	Medical conditions	health and medical history	134	general	0.0344161	-0.0205846	-0.0329467	-0.00822241
Cancer diagnosed by doctor	-0.0285174	-0.0412975	-0.0157339	0.00191631	Medical conditions	health and medical history	2453	general	0.161266	-0.0170299	-0.0298536	-0.00421958
Histology of cancer tumour: Multifocal superficial basal cell carcinoma	-0.242444	-0.361247	-0.123094	0.00758587	Cancer register	health and medical history	40011#8091	Epithelial	0.112069	-0.175426	-0.299384	-0.0526353
Cancer code, self-reported: squamous cell carcinoma	-0.199871	-0.298896	-0.100489	0.0087781	Medical conditions	health and medical history	20001#1062	Skin Cancer	0.760615	-0.0551882	-0.156588	0.0452833
Cancer code, self-reported: skin cancer	-0.117473	-0.17827	-0.056552	0.0155259	Medical conditions	health and medical history	20001#1003	Skin Cancer	0.00157601	-0.133718	-0.19616	-0.0715945
Histology of cancer tumour: Nodular melanoma	-0.208554	-0.339899	-0.0765552	0.122277	Cancer register	health and medical history	40011#8721	Epithelial	0.109422	-0.195129	-0.332247	-0.0594094
Histology of cancer tumour: Adenocarcinoma, intestinal type	0.258707	0.0608537	0.457435	0.344452	Cancer register	health and medical history	40011#8144	Epithelial	0.791434	0.097405	-0.0975825	0.288313
Histology of cancer tumour: Bowen disease	-0.105574	-0.18652	-0.0244068	0.345455	Cancer register	health and medical history	40011#8081	Epithelial	0.00228876	-0.174522	-0.258104	-0.0914748
Cancer code, self-reported: small intestine/small bowel cancer	-0.154903	-0.313608	0.0047167	0.644262	Medical conditions	health and medical history	20001#1019	Gastrointestinal Cancer	0.918594	-0.0423704	-0.205027	0.117851
Histology of cancer tumour: Hodgkin lymphoma, nodular sclerosis	-0.203776	-0.428243	0.0227439	0.665552	Cancer register	health and medical history	40011#9663	Hematologic	0.989949	-0.00960526	-0.240459	0.216234
Histology of cancer tumour: Papillary carcinoma, follicular variant	0.19672	-0.0419768	0.436733	0.728695	Cancer register	health and medical history	40011#8340	Epithelial	0.0372292	0.366437	0.140849	0.585059
Histology of cancer tumour: Adenocarcinoma, NOS	0.0141188	-0.00417116	0.032418	0.788381	Cancer register	health and medical history	40011#8140	Epithelial	0.587954	0.0139232	-0.00433424	0.0321526
Behaviour of cancer tumour: Carcinoma in situ	-0.015605	-0.0363028	0.00510538	0.797906	Cancer register	health and medical history	40012#2	general	0.0306096	-0.0351265	-0.0559632	-0.0143282
Cancer code, self-reported: rodent ulcer	-0.0673577	-0.15734	0.0228904	0.800871	Medical conditions	health and medical history	20001#1073	Skin Cancer	0.513076	-0.0792811	-0.171022	0.0117271
Histology of cancer tumour: Malignant lymphoma, non-Hodgkin	-0.103005	-0.243077	0.0377654	0.805116	Cancer register	health and medical history	40011#9591	Hematologic	0.015337	-0.262342	-0.408801	-0.117323
Histology of cancer tumour: Follicular lymphoma, NOS	-0.095248	-0.228672	0.0387981	0.805116	Cancer register	health and medical history	40011#9690	Hematologic	0.795346	-0.0680856	-0.204524	0.0667088
Histology of cancer tumour: Chronic lymphocytic leukemia/small lymphocytic lymphoma	0.0629024	-0.0313026	0.157359	0.805116	Cancer register	health and medical history	40011#9823	Hematologic	0.892273	0.0284691	-0.0656263	0.121673
Cancer code, self-reported: hodgkins lymphoma / hodgkins disease	-0.065201	-0.176547	0.0465823	0.83724	Medical conditions	health and medical history	20001#1052	Haematological Malignancy	0.95683	0.018009	-0.0942492	0.129028
Histology of cancer tumour: Paget disease, mammary	0.221061	-0.188453	0.634251	0.86033	Cancer register	health and medical history	40011#8540	Epithelial	0.188237	0.479924	0.096868	0.842271
Histology of cancer tumour: Non-small cell carcinoma	-0.0464613	-0.187921	0.0956464	0.947491	Cancer register	health and medical history	40011#8046	Epithelial	0.975541	0.0139761	-0.128862	0.154809
Histology of cancer tumour: Endometrioid carcinoma	0.0198936	-0.0437817	0.0836945	0.947491	Cancer register	health and medical history	40011#8380	Epithelial	0.961543	0.00942907	-0.0543265	0.0727968
Histology of cancer tumour: Adrenal cortical carcinoma	0.1487	-0.43934	0.74708	0.953073	Cancer register	health and medical history	40011#8370	Epithelial	0.902078	-0.173924	-0.788587	0.412959
Histology of cancer tumour: Squamous intraepithelial neoplasia, grade III	0.0115082	-0.0398516	0.0629418	0.961246	Cancer register	health and medical history	40011#8077	Epithelial	0.842844	-0.0219585	-0.0736682	0.0295035
Histology of cancer tumour: Follicular lymphoma, grade 2	-0.0449361	-0.266868	0.178642	0.96564	Cancer register	health and medical history	40011#9691	Hematologic	0.961543	0.0324929	-0.192029	0.251924
Histology of cancer tumour: Malignant lymphoma, large B-cell, diffuse	0.0139446	-0.0731412	0.101261	0.973559	Cancer register	health and medical history	40011#9680	Hematologic	0.751339	-0.0489011	-0.136963	0.0384545
Histology of cancer tumour: Carcinoma, NOS	0.00362037	-0.0329314	0.0402136	0.977285	Cancer register	health and medical history	40011#8010	Epithelial	0.661643	-0.0248798	-0.0616408	0.0117573
Cancer code, self-reported: cervical cancer	-0.000450478	-0.0544648	0.0536543	0.997526	Medical conditions	health and medical history	20001#1041	Genital Tract Cancer	0.961543	-0.00811497	-0.0623893	0.0458822
Histology of cancer tumour: Hodgkin lymphoma, nodular lymphocyte predominance	0.000438233	-0.536724	0.548078	0.99912	Cancer register	health and medical history	40011#9659	Hematologic	0.314792	-0.635968	-1.2119	-0.0705756
Other serious medical condition/disability diagnosed by doctor	0.0197065	0.0111443	0.0282705	0.00110942	Medical conditions	health and medical history	2473	Medical conditions	0.643795	-0.00597911	-0.0145421	0.00257957
Diabetes diagnosed by doctor	0.0197771	0.00365396	0.0359081	0.426148	Medical conditions	health and medical history	2443	Medical conditions	0.8495	0.00650154	-0.00960471	0.0225855
Interpolated Age of participant when non-cancer illness first diagnosed	-0.00397134	-0.00725877	-0.000683909	0.439267	Medical conditions	health and medical history	20009	Medical conditions	0.926996	-0.000820907	-0.00410961	0.00246779
Greatest number of times bowels opened per day	-0.0117807	-0.0224172	-0.00114425	0.517044	Digestive health	health and medical history	21042	Digestive health	0.309948	-0.0119052	-0.0225386	-0.00127183
Mouth/teeth dental problems: Painful gums	0.0228743	0.00199515	0.043767	0.5301	Mouth	health and medical history	6149#2	general	0.805829	0.0101232	-0.0107332	0.0309397
Pain type(s) experienced in last month: Pain all over the body	0.0304086	0.00214651	0.0586955	0.544253	Pain	health and medical history	6159#8	Experience of pain	0.0518416	0.044477	0.0163799	0.0724972
Eye problems/disorders: Diabetes related eye disease	0.0458402	0.00200027	0.0897369	0.579452	Eyesight	health and medical history	6148#1	Medical conditions	0.931911	-0.0096225	-0.0535912	0.0341737
Age hay fever, rhinitis or eczema diagnosed	-0.00752281	-0.0147978	-0.000247788	0.589303	Medical conditions	health and medical history	3761	Medical conditions	0.650901	-0.00503835	-0.0123633	0.00228662
Interpolated Year when non-cancer illness first diagnosed	-0.00404481	-0.0080041	-8.55121e-05	0.591922	Medical conditions	health and medical history	20008	Medical conditions	0.993398	9.5388e-05	-0.00386543	0.0040562
Long-term/recurrent antibiotics as child or teenager	0.0173024	0.000232393	0.0343802	0.602804	Digestive health	health and medical history	21067	Digestive health	0.00967532	0.0318955	0.0148904	0.0488837
Illnesses of siblings: Diabetes	0.0130506	-0.00102605	0.0271329	0.664546	Family history	health and medical history	20111#9	Family history	0.835144	0.0061414	-0.00792746	0.0201947
Stools looser when abdominal discomfort/pain started	-0.0121714	-0.0261778	0.001835	0.688185	Digestive health	health and medical history	21031	Digestive health	0.976686	-0.00134903	-0.0153699	0.0126718
Illnesses of siblings	0.00901068	-0.00168878	0.0197079	0.70758	Family history	health and medical history	20111#101	Family history	0.918594	-0.0028023	-0.0134955	0.00789818
Hearing aid user	-0.0168476	-0.0370806	0.00339574	0.716864	Hearing	health and medical history	3393	general	0.979491	0.00179048	-0.0185328	0.0220802
Age started wearing glasses or contact lenses	0.00253964	-0.00104494	0.00612423	0.805116	Eyesight	health and medical history	2217	Medical conditions	0.000382274	0.00832197	0.00473689	0.0119071
Sensitive stomach	-0.0100263	-0.0241968	0.00414681	0.805116	Digestive health	health and medical history	21064	Digestive health	0.751339	0.00789334	-0.00626225	0.0220392
Illnesses of father: Severe depression	-0.0132867	-0.0323563	0.00579367	0.805116	Family history	health and medical history	20107#12	Family history	0.993398	0.000421103	-0.0186801	0.0194898
Degree bothered by nausea in the last 3 months	-0.0111101	-0.0271092	0.00488905	0.805116	Digestive health	health and medical history	21059	Digestive health	0.623142	0.0115069	-0.00446984	0.0274837
Mouth/teeth dental problems: Toothache	-0.0118629	-0.0293674	0.00565066	0.805116	Mouth	health and medical history	6149#5	general	0.888269	0.00549543	-0.0120271	0.0229908
Age at cancer diagnosis	0.00381834	-0.00202623	0.00966291	0.808415	Cancer register	health and medical history	40008	Medical conditions	0.953606	-0.00108307	-0.00695561	0.00478947
Ever been offered/sought treatment for anxiety	-0.00868657	-0.0223201	0.00494963	0.808415	Digestive health	health and medical history	21062	Medical conditions	0.296385	0.0154351	0.00181459	0.029047
Pain type(s) experienced in last month: Neck or shoulder pain	0.00519301	-0.00296176	0.0133491	0.808415	Pain	health and medical history	6159#3	Experience of pain	0.0615803	0.0126295	0.00448131	0.0207745
Pregnant	0.0851368	-0.0503439	0.220617	0.816925	Medical conditions	health and medical history	3140	Medical conditions	0.17284	0.172738	0.040857	0.304619
Illnesses of siblings	-0.00527943	-0.0137475	0.00318768	0.817784	Family history	health and medical history	20111#100	Family history	0.918594	-0.0028023	-0.0134955	0.00789818
More frequent bowel movements when abdominal discomfort/pain started	-0.00876777	-0.0229988	0.00546325	0.820553	Digestive health	health and medical history	21029	Digestive health	0.856009	0.0055223	-0.0087043	0.0197489
Father still alive	0.00575153	-0.00390383	0.015408	0.835369	Family history	health and medical history	1797	Family history	0.384889	0.0098522	0.000197499	0.0195045
Illnesses of siblings: Severe depression	-0.00899021	-0.0241781	0.0062039	0.83724	Family history	health and medical history	20111#12	Family history	0.714573	0.00927515	-0.00591568	0.0244472
Illnesses of father: Lung cancer	0.00745151	-0.00522682	0.0201342	0.83724	Family history	health and medical history	20107#3	Family history	0.542096	-0.0103964	-0.0230948	0.0022892
Frequency of discomfort/pain in abdomen in last 3 months	-0.00600159	-0.0164034	0.00440024	0.844944	Digestive health	health and medical history	21025	Digestive health	0.339801	0.0111708	0.000775482	0.0215661
Long-standing illness, disability or infirmity	0.00413828	-0.00330725	0.0115845	0.858105	General health	health and medical history	2188	Medical conditions	0.266213	-0.00873002	-0.0161778	-0.00128429
Mother still alive	0.00453588	-0.00373188	0.012804	0.859076	Family history	health and medical history	1835	Family history	0.058986	0.0128824	0.00461841	0.0211457
Vascular/heart problems diagnosed by doctor: Angina	-0.0107657	-0.0307679	0.00924693	0.86033	Medical conditions	health and medical history	6150#2	Medical conditions	0.92881	0.00470552	-0.0153075	0.0246835
Age hayfever or allergic rhinitis diagnosed by doctor	0.00711549	-0.00644252	0.0206735	0.863057	Medical information	health and medical history	22146	Medical conditions	0.147653	0.0183636	0.00482489	0.0319024
Illnesses of father: Alzheimer's disease/dementia	-0.00892664	-0.0260164	0.00817133	0.863057	Family history	health and medical history	20107#10	Family history	0.258295	-0.0203467	-0.0375034	-0.00321582
Diarrhoea when IBS symptoms first began	-0.0171572	-0.050107	0.0157821	0.864149	Digestive health	health and medical history	21074	Digestive health	0.346647	-0.0347979	-0.0675478	-0.00206618
Fractured bone site(s): Wrist	0.012635	-0.0120923	0.0373809	0.870416	Medical conditions	health and medical history	6151#5	Medical conditions	0.927938	-0.00593113	-0.0307018	0.0187832
Degree bothered by urinary frequency/bladder irritability in the last 3 months	0.00547616	-0.00551966	0.016472	0.874555	Digestive health	health and medical history	21058	Digestive health	0.027371	0.0187235	0.00774175	0.0297052
Wears glasses or contact lenses	-0.00573478	-0.0176929	0.00622037	0.883443	Eyesight	health and medical history	2207	general	0.513076	-0.0103673	-0.0223221	0.00159492
Doctor diagnosed hayfever or allergic rhinitis	0.00762847	-0.00841555	0.023678	0.883443	Medical information	health and medical history	22126	Medical conditions	0.719309	-0.00971573	-0.025788	0.00634203
Age diabetes diagnosed	-0.00555318	-0.0180689	0.00696249	0.899093	Medical conditions	health and medical history	2976	Medical conditions	0.196557	0.0159514	0.0034185	0.0284843
Recent medication for bronchiectasis	-0.0611337	-0.204433	0.0813398	0.903609	Medical information	health and medical history	22174	Medical conditions	0.562708	-0.118122	-0.267668	0.0298449
Mouth/teeth dental problems	0.00292117	-0.00412207	0.00996411	0.916921	Mouth	health and medical history	6149#100	general	0.88648	-0.00222963	-0.00927151	0.00481323
Less frequent bowel movements when abdominal discomfort/pain started	0.00619222	-0.00911459	0.021499	0.918824	Digestive health	health and medical history	21030	Digestive health	0.259269	0.0181149	0.00281661	0.0334132
Illnesses of mother: Chronic bronchitis/emphysema	0.00610939	-0.00916695	0.0213924	0.918824	Family history	health and medical history	20110#6	Family history	0.934798	0.00326078	-0.0120222	0.0185239
Satisfaction with bowel habits	0.00384821	-0.00601541	0.0137118	0.923529	Digestive health	health and medical history	21040	Digestive health	0.405168	0.00984219	-1.05784e-05	0.019695
Doctor diagnosed asthma	0.00784063	-0.0122695	0.0279618	0.923529	Medical information	health and medical history	22127	Medical conditions	0.576714	-0.0156461	-0.035825	0.00450236
Ever had prostate specific antigen (PSA) test	-0.0046451	-0.0165678	0.0072787	0.923529	Cancer screening	health and medical history	2365	general	0.997643	0.00010805	-0.0118063	0.0120188
Hearing difficulty/problems with background noise	-0.00278757	-0.00998875	0.00441395	0.925291	Hearing	health and medical history	2257	general	0.309948	0.00806223	0.000861322	0.0152622
Father's age	-0.00162373	-0.00621365	0.0029662	0.941303	Family history	health and medical history	2946	Family history	0.252592	-0.00548616	-0.0100746	-0.000897682
Mouth/teeth dental problems: Bleeding gums	0.00359879	-0.00665928	0.0138594	0.941303	Mouth	health and medical history	6149#3	general	0.748876	0.00576167	-0.00449629	0.0160124
Degree bothered by feeling tired all the time in the last 3 months	-0.00375651	-0.0144884	0.00697538	0.941303	Digestive health	health and medical history	21060	Digestive health	0.959912	0.0016747	-0.00904339	0.0123928
Illnesses of mother: Severe depression	-0.0049335	-0.0192992	0.0094378	0.945178	Family history	health and medical history	20110#12	Family history	0.587114	0.0109895	-0.00337178	0.0253336
Illnesses of siblings: High blood pressure	-0.00311833	-0.0127245	0.00648949	0.947491	Family history	health and medical history	20111#8	Family history	0.617889	0.006965	-0.00264013	0.0165653
Pain type(s) experienced in last month	0.00224862	-0.00470355	0.00920114	0.947491	Pain	health and medical history	6159#100	Experience of pain	0.926265	-0.00174443	-0.00869732	0.00520752
Age asthma diagnosed	-0.00300518	-0.0129113	0.00690095	0.947491	Medical conditions	health and medical history	3786	Medical conditions	0.753184	0.00558855	-0.0044765	0.0156536
Frequency of loose/mushy/watery stools in the last 3 months	-0.00321458	-0.0138394	0.00741022	0.947491	Digestive health	health and medical history	21034	Digestive health	0.928784	0.00250153	-0.00811575	0.0131188
Mouth/teeth dental problems: Mouth ulcers	-0.00337479	-0.0146062	0.00785982	0.947491	Mouth	health and medical history	6149#1	general	0.000407499	0.0258833	0.0146764	0.0370811
Illnesses of mother: Heart disease	-0.0025906	-0.0115688	0.00638903	0.947491	Family history	health and medical history	20110#1	Family history	0.55685	0.00723309	-0.00174414	0.0162059
Overall health rating	-0.00182814	-0.00851612	0.00485983	0.947491	General health	health and medical history	2178	general	0.317055	0.00738027	0.000698345	0.0140622
Illnesses of mother: Diabetes	0.00324321	-0.00897646	0.0154668	0.947491	Family history	health and medical history	20110#9	Family history	0.739482	0.00701159	-0.00520387	0.0192155
Pain type(s) experienced in last month: Headache	-0.00214484	-0.0108016	0.00651327	0.953073	Pain	health and medical history	6159#1	Experience of pain	0.629349	0.00617919	-0.00247784	0.0148323
Degree bothered by headaches in the last 3 months	0.00278659	-0.00893686	0.01451	0.956644	Digestive health	health and medical history	21051	Experience of pain	0.746161	0.00661967	-0.00510066	0.01834
Number of days (out of 10) with abdominal pain	-0.00441368	-0.022985	0.0141576	0.956644	Digestive health	health and medical history	21037	Experience of pain	0.433819	0.0179956	-0.000569525	0.0365607
Chest pain or discomfort	-0.00216072	-0.011648	0.0073285	0.960937	Chest pain	health and medical history	2335	Experience of pain	0.93768	0.00197896	-0.0075093	0.0114613
Bring up phlegm/sputum/mucus on most days	-0.00549971	-0.0298568	0.0188737	0.961181	Medical information	health and medical history	22504	Medical conditions	0.964461	-0.00314531	-0.0275184	0.0211798
Ever been offered/sought treatment for depression	-0.00299716	-0.0163136	0.0103219	0.961246	Digestive health	health and medical history	21063	Medical conditions	0.310253	0.0148755	0.00157581	0.0281677
Doctor diagnosed sarcoidosis	-0.0224605	-0.125118	0.0805683	0.962442	Medical information	health and medical history	22133	Medical conditions	1.38029e-08	-0.354303	-0.461895	-0.247395
Leg pain when walking uphill or hurrying	-0.00561146	-0.0338507	0.0226157	0.96564	Claudication and peripheral artery disease	health and medical history	5474	Experience of pain	0.671515	0.0184175	-0.00964426	0.0465164
Other eye problems	-0.00184976	-0.0116661	0.00796878	0.968444	Eyesight	health and medical history	2227	general	0.404307	-0.0098243	-0.0196537	-1.80136e-06
Reason for glasses/contact lenses: For short-sightedness, i.e. only or mainly for distance viewing such as driving, cinema etc (called 'myopia')	-0.00210302	-0.0145811	0.0103792	0.973559	Eyesight	health and medical history	6147#1	general	0.58484	-0.0096005	-0.0221005	0.00288677
Currently (in last 3 months) suffer from abdominal pain	-0.00211411	-0.0147479	0.0105215	0.973559	Digestive health	health and medical history	21035	Experience of pain	0.379439	0.0129604	0.000337048	0.0255786
Severity of current abdominal distension/tightness	0.00343188	-0.0171821	0.0240459	0.973559	Digestive health	health and medical history	21039	Digestive health	0.798621	0.0101552	-0.0104104	0.0307207
Illnesses of father	-0.00132335	-0.00966422	0.00701638	0.973559	Family history	health and medical history	20107#101	Family history	0.979775	0.000718044	-0.00762064	0.00906008
Cough on most days	-0.00301862	-0.0225896	0.0165617	0.973559	Medical information	health and medical history	22502	general	0.662262	-0.0131595	-0.0327599	0.00641276
Pain type(s) experienced in last month: Knee pain	-0.0012844	-0.00964752	0.00707998	0.973559	Pain	health and medical history	6159#7	Experience of pain	0.664385	-0.00558734	-0.0139566	0.00277785
Ever diagnosed with IBS	-0.00253538	-0.019926	0.0148621	0.973559	Digestive health	health and medical history	21024	Digestive health	0.0853672	0.025702	0.00835414	0.0430305
Illnesses of father: Heart disease	0.00110558	-0.00663708	0.00884895	0.973559	Family history	health and medical history	20107#1	Family history	0.252592	0.00926018	0.00151994	0.0169987
Diagnosed with coeliac disease or gluten sensitivity	-0.00587413	-0.0473478	0.0356525	0.973559	Digestive health	health and medical history	21068	Medical conditions	1.16813e-36	-0.287607	-0.330655	-0.244695
Wheeze or whistling in the chest in last year	-0.00111913	-0.0096412	0.00740429	0.973559	Breathing	health and medical history	2316	general	0.845797	0.0036041	-0.00492104	0.0121252
Mouth/teeth dental problems: Dentures	-0.00122945	-0.0108384	0.0083811	0.973559	Mouth	health and medical history	6149#6	general	0.0414393	-0.015629	-0.025252	-0.00601161
Currently suffer from abdominal distension	0.00140379	-0.0123394	0.0151501	0.977285	Digestive health	health and medical history	21038	Digestive health	0.375608	0.0141348	0.000408041	0.0278538
Least number of times bowels opened per week	0.00101864	-0.00956092	0.0115982	0.977285	Digestive health	health and medical history	21043	Digestive health	0.66278	-0.00711464	-0.0177133	0.00348402
Father's age at death	-0.00035524	-0.0042725	0.00356202	0.977448	Family history	health and medical history	1807	Family history	0.878523	0.00136949	-0.00254951	0.0052885
Pain type(s) experienced in last month: Stomach or abdominal pain	0.00104652	-0.0113661	0.0134633	0.977642	Pain	health and medical history	6159#5	Experience of pain	0.000917985	0.0274013	0.0150178	0.0397731
Reason for glasses/contact lenses: For a 'lazy' eye or an eye with poor vision since childhood (called 'amblyopia')	0.0032066	-0.035034	0.0414932	0.977642	Eyesight	health and medical history	6147#6	general	0.955725	-0.00644415	-0.0447922	0.0317647
Mother's age	0.000262423	-0.00294616	0.003471	0.977642	Family history	health and medical history	1845	Family history	0.993398	-9.2546e-05	-0.00329689	0.0031118
Illnesses of mother: Alzheimer's disease/dementia	0.000840627	-0.011921	0.0136063	0.979374	Family history	health and medical history	20110#10	Family history	0.963162	-0.00181339	-0.0145866	0.0109471
Reason for glasses/contact lenses: For just reading/near work as you are getting older (called 'presbyopia')	0.000723945	-0.0114087	0.0128604	0.980015	Eyesight	health and medical history	6147#3	general	0.666252	0.00805157	-0.00407256	0.0201643
Mother's age at death	5.59276e-05	-0.00418389	0.00429574	0.996185	Family history	health and medical history	3526	Family history	0.496516	0.00381897	-0.000427363	0.0080653
Illnesses of father	8.06468e-05	-0.00745764	0.0076194	0.997296	Family history	health and medical history	20107#100	Family history	0.979775	0.000718044	-0.00762064	0.00906008
Recent medication for asthma	-0.0290343	-0.0682305	0.0101359	0.805116	Medical information	health and medical history	22167	general	0.94431	-0.00768281	-0.0469762	0.0316373
Mean reticulocyte volume	0.0103253	0.00685756	0.0137931	1.39685e-06	Blood count	Biomarkers	30260	Blood count	6.35555e-12	-0.0134069	-0.0168754	-0.00993839
Haematocrit percentage	0.00720834	0.00437969	0.010037	0.000121387	Blood count	Biomarkers	30030	Blood count	3.97244e-09	0.00961939	0.00679086	0.0124479
Mean corpuscular volume	0.00844171	0.00500543	0.011878	0.000274344	Blood count	Biomarkers	30040	Blood count	0.63481	-0.00243405	-0.00587041	0.00100231
Haemoglobin concentration	0.00591877	0.00316406	0.00867347	0.00368047	Blood count	Biomarkers	30020	Blood count	8.02717e-08	0.00870215	0.00594758	0.0114567
Mean sphered cell volume	0.00734271	0.00387084	0.0108146	0.0046638	Blood count	Biomarkers	30270	Blood count	6.89392e-05	-0.00872528	-0.012198	-0.00525259
Platelet crit	-0.00573533	-0.00902095	-0.00244972	0.0541704	Blood count	Biomarkers	30090	Blood count	0.117313	0.00464021	0.00135465	0.00792577
Mean corpuscular haemoglobin	0.00593147	0.00250491	0.00935804	0.056966	Blood count	Biomarkers	30050	Blood count	0.436494	-0.00330912	-0.00673568	0.000117451
Monocyte count	-0.00539717	-0.00875127	-0.00204306	0.11255	Blood count	Biomarkers	30130	Blood count	8.49897e-24	0.0181352	0.0147816	0.0214887
Testosterone	-0.00347519	-0.00568724	-0.00126314	0.126864	Blood biochemistry	Biomarkers	30850	Blood biochemistry	0.0629429	-0.00341275	-0.0056261	-0.00119941
IGF-1	0.00516593	0.00179624	0.00853563	0.152886	Blood biochemistry	Biomarkers	30770	Blood biochemistry	4.98769e-15	0.0145779	0.0112078	0.017948
Glucose	0.00539668	0.00179476	0.00899861	0.176706	Blood biochemistry	Biomarkers	30740	Blood biochemistry	0.928275	0.000860136	-0.00274085	0.00446113
HTLV-1 env antigen for Human T-Lymphotropic Virus 1	-0.0354251	-0.0600638	-0.0107863	0.209484	Infectious Disease Antigens	Biomarkers	23023	Infectious Diseases	0.989424	-0.00116331	-0.0257751	0.0234484
Monocyte percentage	-0.00449672	-0.00783784	-0.0011556	0.290352	Blood count	Biomarkers	30190	Blood count	2.39407e-05	-0.00877568	-0.0121167	-0.00543466
BKV seropositivity for Human Polyomavirus BKV	0.162164	0.0409875	0.283318	0.298472	Infectious Diseases	Biomarkers	23065	Infectious Diseases	0.649791	0.084944	-0.0368097	0.208304
EA-D antigen for Epstein-Barr Virus	0.0320865	0.00767998	0.056493	0.330875	Infectious Disease Antigens	Biomarkers	23006	Infectious Diseases	2.47425e-05	0.0637699	0.0394434	0.0880964
Albumin	0.00447491	0.000888456	0.00806137	0.405472	Blood biochemistry	Biomarkers	30600	Blood biochemistry	0.459215	0.00338932	-0.000196065	0.00697471
High light scatter reticulocyte count	0.00416561	0.00070848	0.00762274	0.439267	Blood count	Biomarkers	30300	Blood count	0.00355777	0.00700433	0.00354639	0.0104623
Mean corpuscular haemoglobin concentration	-0.00410687	-0.00753548	-0.000678268	0.447752	Blood count	Biomarkers	30060	Blood count	0.623159	-0.00246674	-0.00589532	0.000961833
K8.1 antigen for Kaposi's Sarcoma-Associated Herpesvirus	-0.0293835	-0.0540177	-0.00474933	0.452208	Infectious Disease Antigens	Biomarkers	23015	Infectious Diseases	0.616984	0.0180729	-0.00652548	0.0426712
BK VP1 antigen for Human Polyomavirus BKV	0.0284187	0.00390701	0.0529303	0.49593	Infectious Disease Antigens	Biomarkers	23026	Infectious Diseases	0.927938	-0.00598369	-0.0304627	0.0184953
Vitamin D	0.00395661	0.000404099	0.00750912	0.507077	Blood biochemistry	Biomarkers	30890	Blood biochemistry	0.842844	0.00150975	-0.00204324	0.00506274
Platelet count	-0.00354947	-0.0068936	-0.000205347	0.55549	Blood count	Biomarkers	30080	Blood count	0.00988695	0.00626142	0.0029174	0.00960544
L1 antigen for Human Papillomavirus type-18	-0.0258479	-0.0505888	-0.00110705	0.579452	Infectious Disease Antigens	Biomarkers	23032	Infectious Diseases	0.999406	1.37292e-05	-0.0246927	0.0247202
HHV-6 overall seropositivity for Human Herpesvirus-6	-0.0885155	-0.173588	-0.00362723	0.583201	Infectious Diseases	Biomarkers	23055	Infectious Diseases	0.845863	0.035323	-0.0493996	0.120715
Immature reticulocyte fraction	0.0036013	0.000121699	0.0070809	0.589303	Blood count	Biomarkers	30280	Blood count	0.881336	-0.0011541	-0.00463457	0.00232638
Creatinine	0.00283614	2.89599e-05	0.00564332	0.60352	Blood biochemistry	Biomarkers	30700	Blood biochemistry	0.258295	-0.0033385	-0.00614605	-0.000530943
Cystatin C	0.00314397	-1.4572e-05	0.00630251	0.626745	Blood biochemistry	Biomarkers	30720	Blood biochemistry	1.63474e-08	-0.0103846	-0.0135435	-0.00722579
HIV-1 env antigen for Human Immunodeficiency Virus	-0.0244317	-0.0491246	0.000261096	0.629496	Infectious Disease Antigens	Biomarkers	23025	Infectious Diseases	0.662262	0.0165699	-0.00808431	0.0412242
High light scatter reticulocyte percentage	0.0033711	-0.000110682	0.00685289	0.644262	Blood count	Biomarkers	30290	Blood count	0.0955066	0.005074	0.00159139	0.00855662
T. gondii seropositivity for Toxoplasma gondii	-0.0535967	-0.110049	0.00280968	0.656599	Infectious Diseases	Biomarkers	23062	Infectious Diseases	0.993398	-0.0015684	-0.0580127	0.0547125
IE1B antigen for Human Herpesvirus-6	-0.0229386	-0.0476508	0.00177353	0.664546	Infectious Disease Antigens	Biomarkers	23011	Infectious Diseases	0.879837	0.00848901	-0.0161861	0.0331642
Reticulocyte count	0.00315841	-0.000281353	0.00659818	0.664546	Blood count	Biomarkers	30250	Blood count	7.39606e-06	0.00944726	0.00600678	0.0128877
Mean platelet (thrombocyte) volume	-0.00316817	-0.00662283	0.000286496	0.664546	Blood count	Biomarkers	30100	Blood count	0.250489	-0.00414659	-0.00760117	-0.000692022
HSV-2 seropositivity for Herpes Simplex virus-2	-0.0615125	-0.13008	0.00702835	0.668902	Infectious Diseases	Biomarkers	23051	Infectious Diseases	0.610764	-0.0512158	-0.120244	0.0173942
E6 antigen for Human Papillomavirus type-16	-0.0399611	-0.0858369	0.00591467	0.68689	Infectious Disease Antigens	Biomarkers	23030	Infectious Diseases	0.991238	-0.00159884	-0.0469463	0.0437487
Aspartate aminotransferase	-0.00289273	-0.00624128	0.000455829	0.68868	Blood biochemistry	Biomarkers	30650	Blood biochemistry	9.48068e-06	0.00911083	0.00576209	0.0124596
Red blood cell (erythrocyte) count	0.00250471	-0.000467975	0.0054774	0.70758	Blood count	Biomarkers	30010	Blood count	3.0567e-09	0.0101758	0.0072033	0.0131482
SHBG	-0.00281038	-0.00614713	0.000526367	0.70758	Blood biochemistry	Biomarkers	30830	Blood biochemistry	6.52553e-07	-0.00993686	-0.0132738	-0.00659988
sag1 antigen for Toxoplasma gondii	-0.0206263	-0.0451649	0.0039122	0.709712	Infectious Disease Antigens	Biomarkers	23021	Infectious Diseases	0.946211	0.00475153	-0.0197497	0.0292528
HIV-1 seropositivity for Human Immunodeficiency Virus	-0.496241	-1.12187	0.125641	0.758464	Infectious Diseases	Biomarkers	23064	Infectious Diseases	0.962788	-0.0921562	-0.748416	0.523207
HHV-6B seropositivity for Human Herpesvirus-6	-0.0479885	-0.108329	0.0122625	0.758464	Infectious Diseases	Biomarkers	23057	Infectious Diseases	0.661643	0.0408295	-0.0194696	0.101408
tarp-D F2 antigen for Chlamydia trachomatis	0.0185043	-0.00615688	0.0431654	0.799494	Infectious Disease Antigens	Biomarkers	23036	Infectious Diseases	0.560968	0.0197238	-0.00489431	0.0443418
HBV seropositivity for Hepatitis B Virus	-0.149018	-0.352406	0.0547461	0.805116	Infectious Diseases	Biomarkers	23060	Infectious Diseases	0.862692	0.075059	-0.129318	0.274967
ZEBRA antigen for Epstein-Barr Virus	0.0174858	-0.0069546	0.0419262	0.805116	Infectious Disease Antigens	Biomarkers	23005	Infectious Diseases	4.02507e-06	0.0684385	0.0440948	0.0927822
L1 antigen for Human Papillomavirus type-16	-0.0171787	-0.0418768	0.00751936	0.805116	Infectious Disease Antigens	Biomarkers	23029	Infectious Diseases	0.49913	0.0220988	-0.00255436	0.0467519
Reticulocyte percentage	0.00241172	-0.00107031	0.00589374	0.805116	Blood count	Biomarkers	30240	Blood count	0.00263661	0.00721911	0.00373631	0.0107019
EBV seropositivity for Epstein-Barr Virus	0.0722889	-0.032392	0.176919	0.805116	Infectious Diseases	Biomarkers	23053	Infectious Diseases	0.26832	0.124758	0.0184794	0.232217
HHV-6A seropositivity for Human Herpesvirus-6	-0.0397688	-0.0987142	0.0191004	0.805116	Infectious Diseases	Biomarkers	23056	Infectious Diseases	0.508509	0.0517038	-0.00718153	0.110859
Phosphate	-0.00234708	-0.00589119	0.00119704	0.808415	Blood biochemistry	Biomarkers	30810	Blood biochemistry	0.280442	0.00407734	0.000534039	0.00762064
HTLV-1 gag antigen for Human T-Lymphotropic Virus 1	-0.0159072	-0.0403869	0.00857249	0.808415	Infectious Disease Antigens	Biomarkers	23022	Infectious Diseases	0.191889	-0.0312883	-0.0557167	-0.00685978
Eosinophill percentage	0.00220496	-0.00123889	0.0056488	0.808415	Blood count	Biomarkers	30210	Blood count	6.32312e-29	0.0205203	0.0170772	0.0239634
White blood cell (leukocyte) count	-0.00217572	-0.00563017	0.00127874	0.816925	Blood count	Biomarkers	30000	Blood count	3.30219e-89	0.0358823	0.0324301	0.0393345
Platelet distribution width	-0.00199232	-0.00541106	0.00142643	0.839068	Blood count	Biomarkers	30110	Blood count	0.328315	-0.00373345	-0.0071521	-0.000314792
U14 antigen for Human Herpesvirus-7	0.0141866	-0.0101763	0.0385494	0.839446	Infectious Disease Antigens	Biomarkers	23013	Infectious Diseases	0.703184	-0.0150499	-0.0393705	0.00927064
Creatinine (enzymatic) in urine	-0.00185701	-0.00509762	0.0013836	0.848413	Urine assays	Biomarkers	30510	Urine assays	0.00410619	0.00650238	0.00326179	0.00974298
Urate	0.00166227	-0.00129554	0.00462008	0.857978	Blood biochemistry	Biomarkers	30880	Blood biochemistry	2.35534e-05	-0.00778129	-0.0107394	-0.00482314
IE1A antigen for Human Herpesvirus-6	-0.0137761	-0.0384547	0.0109026	0.858105	Infectious Disease Antigens	Biomarkers	23010	Infectious Diseases	0.110161	0.0351694	0.0105462	0.0597926
MC VP1 antigen for Merkel Cell Polyomavirus	-0.0135827	-0.0382833	0.011118	0.858105	Infectious Disease Antigens	Biomarkers	23028	Infectious Diseases	0.83181	0.0111697	-0.0134891	0.0358285
EBNA-1 antigen for Epstein-Barr Virus	0.0134478	-0.011289	0.0381846	0.859935	Infectious Disease Antigens	Biomarkers	23004	Infectious Diseases	0.890964	-0.00758804	-0.0322837	0.0171076
p22 antigen for Toxoplasma gondii	-0.0133072	-0.0379285	0.0113142	0.86033	Infectious Disease Antigens	Biomarkers	23020	Infectious Diseases	0.824963	0.0114274	-0.0131522	0.0360069
Apolipoprotein B	0.00185753	-0.00163679	0.00535184	0.863057	Blood biochemistry	Biomarkers	30640	Blood biochemistry	0.161266	0.00464264	0.00114746	0.00813783
Lipoprotein A	-0.00204212	-0.00595343	0.00186919	0.863057	Blood biochemistry	Biomarkers	30790	Blood biochemistry	0.916121	0.00104595	-0.00286722	0.00495912
1gG antigen for Herpes Simplex virus-1	0.0125446	-0.0120189	0.0371081	0.870416	Infectious Disease Antigens	Biomarkers	23000	Infectious Diseases	0.734978	0.0142993	-0.0102212	0.0388199
H. pylori Definition I seropositivity for Helicobacter pylori	0.0368152	-0.0400292	0.113749	0.883443	Infectious Diseases	Biomarkers	23073	Infectious Diseases	0.720281	0.0454899	-0.030751	0.121631
Neutrophill count	-0.00165262	-0.00511115	0.0018059	0.883443	Blood count	Biomarkers	30140	Blood count	1.0225e-49	0.0268774	0.0234201	0.0303347
MCV seropositivity for Merkel Cell Polyomavirus	-0.0249065	-0.077269	0.0274125	0.883443	Infectious Diseases	Biomarkers	23067	Infectious Diseases	0.931911	0.0113949	-0.0407773	0.0636749
H. pylori Definition II seropositivity for Helicobacter pylori	0.0263965	-0.0295895	0.0824386	0.883636	Infectious Diseases	Biomarkers	23074	Infectious Diseases	0.981011	0.00448252	-0.0514623	0.0602837
Potassium in urine	-0.00161034	-0.00503319	0.00181251	0.883636	Urine assays	Biomarkers	30520	Urine assays	0.0192453	0.00603722	0.00261442	0.00946002
2mgG unique antigen for Herpes Simplex virus-2	-0.0115797	-0.0363163	0.0131569	0.883732	Infectious Disease Antigens	Biomarkers	23001	Infectious Diseases	0.868363	0.00889296	-0.0158017	0.0335876
GroEL antigen for Helicobacter pylori	0.0112982	-0.0132566	0.0358529	0.892373	Infectious Disease Antigens	Biomarkers	23042	Infectious Diseases	0.964461	0.00304843	-0.0214655	0.0275623
Sodium in urine	-0.00151493	-0.00484592	0.00181606	0.892373	Urine assays	Biomarkers	30530	Urine assays	0.262754	0.00392655	0.000595622	0.00725748
Direct bilirubin	0.00165641	-0.00198646	0.00529928	0.892373	Blood biochemistry	Biomarkers	30660	Blood biochemistry	0.888269	-0.0011408	-0.00478588	0.00250428
Microalbumin in urine	-0.00281633	-0.00901443	0.00338178	0.892373	Urine assays	Biomarkers	30500	Urine assays	0.772647	-0.00327	-0.00950148	0.00296149
pGP3 antigen for Chlamydia trachomatis	-0.0203772	-0.0657694	0.0250151	0.893387	Infectious Disease Antigens	Biomarkers	23038	Infectious Diseases	0.955725	0.00770993	-0.0377855	0.0532054
HBc antigen for Hepatitis B Virus	-0.0198331	-0.0652673	0.025601	0.903486	Infectious Disease Antigens	Biomarkers	23016	Infectious Diseases	0.992844	-0.00137042	-0.0469288	0.044188
KSHV seropositivity for Kaposi's Sarcoma-Associated Herpesvirus	0.0410482	-0.0548222	0.137081	0.903609	Infectious Diseases	Biomarkers	23059	Infectious Diseases	0.787306	0.0484117	-0.0470417	0.143054
Oestradiol	0.00307458	-0.00424293	0.0103921	0.912066	Blood biochemistry	Biomarkers	30800	Blood biochemistry	0.886128	0.00234104	-0.00502947	0.00971154
Eosinophill count	0.00139326	-0.00205039	0.00483691	0.918824	Blood count	Biomarkers	30150	Blood count	1.52817e-72	0.0322823	0.0288405	0.0357242
Alkaline phosphatase	0.00133	-0.00208927	0.00474926	0.923555	Blood biochemistry	Biomarkers	30610	Blood biochemistry	0.984157	-0.000203495	-0.00362307	0.00321608
Total protein	0.00141393	-0.00223175	0.00505962	0.924488	Blood biochemistry	Biomarkers	30860	Blood biochemistry	1.98083e-05	0.00965572	0.00601104	0.0133004
Basophill count	0.00239176	-0.00408094	0.00886446	0.931794	Blood count	Biomarkers	30160	Blood count	6.50441e-07	0.019295	0.0128217	0.0257682
C-reactive protein	0.00126878	-0.0021936	0.00473116	0.932111	Blood biochemistry	Biomarkers	30710	Blood biochemistry	0.0115649	0.00638957	0.00292673	0.00985242
Core antigen for Hepatitis C Virus	-0.0163892	-0.0618672	0.0290888	0.937243	Infectious Disease Antigens	Biomarkers	23018	Infectious Diseases	0.981033	0.0031262	-0.0425513	0.0488037
Apolipoprotein A	-0.00120368	-0.00456317	0.00215581	0.937294	Blood biochemistry	Biomarkers	30630	Blood biochemistry	3.00595e-06	0.0095256	0.00616809	0.0128831
CagA antigen for Helicobacter pylori	-0.0120555	-0.0470264	0.0229154	0.944898	Infectious Disease Antigens	Biomarkers	23039	Infectious Diseases	0.764777	0.018669	-0.0160211	0.0533591
pp 28 antigen for Human Cytomegalovirus	-0.00790148	-0.0323921	0.0165891	0.947491	Infectious Disease Antigens	Biomarkers	23009	Infectious Diseases	0.835144	0.0106748	-0.013773	0.0351226
Lymphocyte count	-0.00108647	-0.00452532	0.00235238	0.947491	Blood count	Biomarkers	30120	Blood count	1.42147e-64	0.0304085	0.0269713	0.0338458
HIV-1 gag antigen for Human Immunodeficiency Virus	-0.00776359	-0.0324867	0.0169595	0.947491	Infectious Disease Antigens	Biomarkers	23024	Infectious Diseases	0.963162	0.00338582	-0.0212953	0.0280669
OMP antigen for Helicobacter pylori	0.00738182	-0.0171895	0.0319532	0.947491	Infectious Disease Antigens	Biomarkers	23041	Infectious Diseases	0.922614	-0.00624773	-0.0307769	0.0182815
momp A antigen for Chlamydia trachomatis	-0.00719709	-0.0318842	0.01749	0.947491	Infectious Disease Antigens	Biomarkers	23034	Infectious Diseases	0.918594	-0.00647426	-0.0311189	0.0181704
VCA p18 antigen for Epstein-Barr Virus	-0.00714237	-0.0318196	0.0175348	0.947491	Infectious Disease Antigens	Biomarkers	23003	Infectious Diseases	0.926265	0.00618735	-0.0184475	0.0308222
Calcium	-0.00105236	-0.00468878	0.00258405	0.947491	Blood biochemistry	Biomarkers	30680	Blood biochemistry	0.513076	0.00311778	-0.000517805	0.00675336
Rheumatoid factor	0.00324885	-0.00839859	0.0148963	0.947491	Blood biochemistry	Biomarkers	30820	Blood biochemistry	0.876508	-0.00400634	-0.0154147	0.00740205
LDL direct	0.000960133	-0.00251873	0.004439	0.947491	Blood biochemistry	Biomarkers	30780	Blood biochemistry	0.316075	0.00385096	0.000371534	0.00733038
gE / gI antigen for Varicella Zoster Virus	-0.00673932	-0.0312127	0.0177341	0.947491	Infectious Disease Antigens	Biomarkers	23002	Infectious Diseases	0.000832478	-0.0543497	-0.0787447	-0.0299547
HHV-7 seropositivity for Human Herpesvirus-7	-0.03094	-0.143794	0.0816989	0.947491	Infectious Diseases	Biomarkers	23058	Infectious Diseases	0.845863	-0.04727	-0.158834	0.0654442
pp150 Nter antigen for Human Cytomegalovirus	0.00663762	-0.0177639	0.0310392	0.947491	Infectious Disease Antigens	Biomarkers	23007	Infectious Diseases	0.963162	0.00324347	-0.0211165	0.0276034
HTLV-1 seropositivity for Human T-Lymphotropic Virus 1	0.0474079	-0.159029	0.25412	0.960937	Infectious Diseases	Biomarkers	23063	Infectious Diseases	0.989949	-0.00844029	-0.217525	0.195858
Nucleated red blood cell percentage	0.00832432	-0.0288816	0.0455302	0.961246	Blood count	Biomarkers	30230	Blood count	0.850159	-0.0149532	-0.0522205	0.0223141
Lymphocyte percentage	0.000764073	-0.00266359	0.00419173	0.961246	Blood count	Biomarkers	30180	Blood count	0.791434	0.00172923	-0.00169843	0.00515689
Urea	-0.000720111	-0.00405258	0.00261236	0.962797	Blood biochemistry	Biomarkers	30670	Blood biochemistry	0.991238	-0.000109945	-0.00344285	0.00322296
Nucleated red blood cell count	0.00770631	-0.0294906	0.0449032	0.964458	Blood count	Biomarkers	30170	Blood count	0.845863	-0.0156662	-0.052928	0.0215957
Cholesterol	0.000708527	-0.00272362	0.00414068	0.964458	Blood biochemistry	Biomarkers	30690	Blood biochemistry	0.000166662	0.00829465	0.00486245	0.0117269
Triglycerides	0.000652153	-0.00273831	0.00404262	0.967088	Blood biochemistry	Biomarkers	30870	Blood biochemistry	1.06528e-22	0.017898	0.0145077	0.0212883
E7 antigen for Human Papillomavirus type-16	-0.00467681	-0.0293114	0.0199578	0.967088	Infectious Disease Antigens	Biomarkers	23031	Infectious Diseases	0.370813	0.0254368	0.00085235	0.0500213
pp 52 antigen for Human Cytomegalovirus	-0.00432303	-0.0287605	0.0201145	0.973559	Infectious Disease Antigens	Biomarkers	23008	Infectious Diseases	0.993398	-0.000626123	-0.0250218	0.0237695
HPV 18 seropositivity for Human Papillomavirus type-18	0.0291201	-0.137142	0.195705	0.973559	Infectious Diseases	Biomarkers	23069	Infectious Diseases	0.987216	0.00831841	-0.157997	0.171937
NS3 antigen for Hepatitis C Virus	-0.00410704	-0.028795	0.020581	0.973559	Infectious Disease Antigens	Biomarkers	23019	Infectious Diseases	0.4876	0.0224405	-0.00219897	0.0470799
Gamma glutamyltransferase	0.000518924	-0.00272323	0.00376108	0.973559	Blood biochemistry	Biomarkers	30730	Blood biochemistry	0.000153487	0.0078705	0.00462796	0.011113
p101 k antigen for Human Herpesvirus-6	-0.00383818	-0.0284179	0.0207416	0.973559	Infectious Disease Antigens	Biomarkers	23012	Infectious Diseases	0.61382	-0.0181912	-0.0427247	0.00634229
VacA antigen for Helicobacter pylori	-0.00363772	-0.0282467	0.0209713	0.973559	Infectious Disease Antigens	Biomarkers	23040	Infectious Diseases	0.989949	-0.00103704	-0.0256038	0.0235297
JC VP1 antigen for Human Polyomavirus JCV	-0.00344813	-0.0280965	0.0212002	0.973559	Infectious Disease Antigens	Biomarkers	23027	Infectious Diseases	0.00776203	0.0470081	0.0224294	0.0715869
HPV 16 Definition II seropositivity for Human Papillomavirus type-16	0.0164406	-0.102344	0.135423	0.973559	Infectious Diseases	Biomarkers	23075	Infectious Diseases	0.845863	0.0486803	-0.0700151	0.166024
HDL cholesterol	-0.0004309	-0.00373493	0.00287313	0.973559	Blood biochemistry	Biomarkers	30760	Blood biochemistry	0.00320452	0.0067583	0.00345536	0.0100612
tarp-D F1 antigen for Chlamydia trachomatis	0.00540379	-0.0401404	0.050948	0.976199	Infectious Disease Antigens	Biomarkers	23035	Infectious Diseases	0.616984	0.0331665	-0.0120938	0.0784267
Basophill percentage	-0.000393422	-0.00385226	0.00306541	0.976199	Blood count	Biomarkers	30220	Blood count	0.961543	-0.00050963	-0.00396847	0.00294921
C. trachomatis Definition I seropositivity for Chlamydia trachomatis	-0.00705396	-0.0703228	0.056241	0.976199	Infectious Diseases	Biomarkers	23070	Infectious Diseases	0.587114	0.0480608	-0.0147433	0.110681
Total bilirubin	-0.000365263	-0.00369741	0.00296689	0.976199	Blood biochemistry	Biomarkers	30840	Blood biochemistry	0.981033	0.00025726	-0.00307511	0.00358963
HBe antigen for Hepatitis B Virus	-0.00239917	-0.0271232	0.0223248	0.977285	Infectious Disease Antigens	Biomarkers	23017	Infectious Diseases	0.895735	0.00737688	-0.0173039	0.0320577
CMV seropositivity for Human Cytomegalovirus	0.00483056	-0.0456571	0.055321	0.977285	Infectious Diseases	Biomarkers	23054	Infectious Diseases	0.999406	-7.25306e-05	-0.0504707	0.0503612
HPV 16 Definition I seropositivity for Human Papillomavirus type-16	-0.011496	-0.137481	0.114673	0.977448	Infectious Diseases	Biomarkers	23068	Infectious Diseases	0.981903	-0.00807284	-0.133865	0.116243
C. trachomatis Definition II seropositivity for Chlamydia trachomatis	0.0135713	-0.140733	0.168253	0.977448	Infectious Diseases	Biomarkers	23071	Infectious Diseases	0.668084	0.101615	-0.0531452	0.254288
Red blood cell (erythrocyte) distribution width	-0.000288356	-0.00372681	0.0031501	0.977642	Blood count	Biomarkers	30070	Blood count	0.0193912	-0.00605683	-0.00949518	-0.00261848
Neutrophill percentage	0.000262381	-0.00319628	0.00372104	0.977642	Blood count	Biomarkers	30200	Blood count	0.513772	-0.00292691	-0.00638556	0.000531744
Alanine aminotransferase	0.000236664	-0.00304862	0.00352194	0.977642	Blood biochemistry	Biomarkers	30620	Blood biochemistry	9.94347e-08	0.010314	0.0070284	0.0135996
PorB antigen for Chlamydia trachomatis	0.00176258	-0.022972	0.0264972	0.977648	Infectious Disease Antigens	Biomarkers	23037	Infectious Diseases	0.963162	0.00330053	-0.0213913	0.0279924
HSV-1 seropositivity for Herpes Simplex virus-1	0.00359795	-0.0494186	0.0566053	0.979018	Infectious Diseases	Biomarkers	23050	Infectious Diseases	0.828513	0.0242174	-0.0287483	0.0773229
Catalase antigen for Helicobacter pylori	0.00139988	-0.0232051	0.0260048	0.980537	Infectious Disease Antigens	Biomarkers	23043	Infectious Diseases	0.993398	-0.000675188	-0.0252378	0.0238874
LANA antigen for Kaposi's Sarcoma-Associated Herpesvirus	-0.00138821	-0.0260592	0.0232828	0.980537	Infectious Disease Antigens	Biomarkers	23014	Infectious Diseases	0.382161	0.0252049	0.000584187	0.0498256
JCV seropositivity for Human Polyomavirus JCV	-0.00261023	-0.0527137	0.0474872	0.982603	Infectious Diseases	Biomarkers	23066	Infectious Diseases	0.0255799	0.0862878	0.036098	0.13663
HCV seropositivity for Hepatitis C Virus	0.0248794	-0.485156	0.536853	0.982603	Infectious Diseases	Biomarkers	23061	Infectious Diseases	0.922614	-0.131385	-0.660942	0.368871
momp D antigen for Chlamydia trachomatis	-0.00102903	-0.0256614	0.0236033	0.985868	Infectious Disease Antigens	Biomarkers	23033	Infectious Diseases	0.778252	0.012792	-0.011796	0.0373799
UreA antigen for Helicobacter pylori	-0.000253683	-0.0248286	0.0243212	0.997526	Infectious Disease Antigens	Biomarkers	23044	Infectious Diseases	0.577946	-0.0189955	-0.0435236	0.00553258
Glycated haemoglobin (HbA1c)	-1.32635e-05	-0.00334781	0.00332128	0.997526	Blood biochemistry	Biomarkers	30750	Blood biochemistry	0.993648	6.92733e-05	-0.00326496	0.00340351
Body mass index (BMI)	-0.00173608	-0.00511616	0.001644	0.868917	Body size measures	Physical measures	21001	Anthropometry	0.719309	-0.00204085	-0.00542086	0.00133916
Systolic blood pressure, automated reading	-0.00154278	-0.00479878	0.00171323	0.883636	Blood pressure	Physical measures	4080	Blood pressure	0.720281	0.0019473	-0.00131091	0.00520551
Height	-0.00228719	-0.00965439	0.00508	0.947491	Body size measures	Physical measures	12144	Anthropometry	0.0683364	-0.0112185	-0.0185737	-0.00386341
Pulse rate, automated reading	-0.00101426	-0.00448675	0.00245823	0.947491	Blood pressure	Physical measures	102	Blood pressure	0.751339	-0.00193982	-0.00541466	0.00153502
Weight	0.000828978	-0.00216203	0.00381998	0.947491	Body size measures	Physical measures	21002	Anthropometry	0.0115649	-0.00551893	-0.00850968	-0.00252818
Diastolic blood pressure, automated reading	-0.000844768	-0.00428291	0.00259337	0.953073	Blood pressure	Physical measures	4079	Blood pressure	2.50216e-05	0.00899971	0.00555938	0.01244
Skin colour	0.264361	0.256698	0.272024	0	Sun exposure	Lifestyle	1717	Sun exposure	0	0.148658	0.141089	0.156226
Ease of skin tanning	-0.231333	-0.237661	-0.225006	0	Sun exposure	Lifestyle	1727	Sun exposure	0	-0.123047	-0.129338	-0.116756
Childhood sunburn occasions	-0.130056	-0.137748	-0.122365	3.33306e-237	Sun exposure	Lifestyle	1737	Sun exposure	3.73393e-67	-0.0693483	-0.0770327	-0.0616638
Use of sun/uv protection	-0.0542987	-0.0605915	-0.0480059	3.79876e-61	Sun exposure	Lifestyle	2267	Sun exposure	6.73995e-25	-0.0348169	-0.041112	-0.0285218
Facial ageing	-0.0260297	-0.0341219	-0.0179375	8.08136e-08	Sun exposure	Lifestyle	1757	Sun exposure	1.1579e-06	-0.0237284	-0.031838	-0.0156187
Number of cigarettes previously smoked daily (current cigar/pipe smokers)	0.192222	0.0819428	0.302502	0.0557773	Smoking	Lifestyle	6183		0.262754	0.123361	0.0186609	0.228061
Frequency of walking for pleasure in last 4 weeks	0.0108838	0.00374982	0.0180178	0.155768	Physical activity	Lifestyle	971	Physical activity	0.117214	0.0100881	0.00295019	0.017226
Frequency of solarium/sunlamp use	0.0247327	0.00798785	0.0414776	0.190138	Sun exposure	Lifestyle	2277	Sun exposure	0.00333908	0.0339809	0.0172873	0.0506745
Bread intake	-0.00473518	-0.00800978	-0.00146059	0.208014	Diet	Lifestyle	1438	Diet	0.224685	-0.0040445	-0.00731804	-0.00077097
Ever taken cannabis	0.0210319	0.00611915	0.0359446	0.223176	Cannabis use	Lifestyle	20453	Mental health	0.0466198	0.023828	0.00897188	0.0386841
Salad / raw vegetable intake	0.00896827	0.00200226	0.0159343	0.363695	Diet	Lifestyle	1299	Diet	0.000975812	0.0153692	0.00839933	0.0223391
Why stopped smoking	-0.0205971	-0.0378489	-0.00334187	0.452208	Smoking	Lifestyle	6157#100	Smoking	0.0306096	-0.0291792	-0.0464892	-0.011889
Weekly usage of mobile phone in last 3 months	0.00754859	0.000775235	0.0143219	0.507077	Electronic device use	Lifestyle	1120	Electronic device use	0.119309	0.00953681	0.00276636	0.0163073
Nap during day	-0.00733528	-0.0142018	-0.000468749	0.549942	Sleep	Lifestyle	1190	Sleep	0.295639	-0.00779565	-0.0146662	-0.000925124
Never eat eggs, dairy, wheat, sugar: I eat all of the above	-0.00860791	-0.0168875	-0.000329693	0.583201	Diet	Lifestyle	6144#5	Diet	0.875335	0.00291804	-0.00535787	0.0111976
Daytime dozing / sleeping (narcolepsy)	-0.00814034	-0.0162937	1.29743e-05	0.625292	Sleep	Lifestyle	1220	Sleep	0.361307	-0.00854571	-0.0167033	-0.000388081
Frequency of other exercises in last 4 weeks	0.00877865	-5.22216e-05	0.0176095	0.626745	Physical activity	Lifestyle	3637	Physical activity	0.470766	0.0082024	-0.000618399	0.0170232
Tea intake	-0.00342927	-0.00688612	2.75797e-05	0.626745	Diet	Lifestyle	1488	Diet	0.946768	-0.000667041	-0.00412554	0.00279146
Average weekly fortified wine intake	-0.0130948	-0.0263858	0.000196176	0.633869	Alcohol	Lifestyle	1608	Alcohol	0.301745	-0.0149973	-0.0283056	-0.00168898
Above moderate/vigorous recommendation	0.00719504	-0.00041141	0.0148015	0.662946	MET Scores	Lifestyle	22035	Physical activity	0.0623229	0.0117769	0.00416166	0.0193931
Cheese intake	-0.00595917	-0.0123176	0.000399312	0.664546	Diet	Lifestyle	1408	Diet	0.00643319	-0.0123518	-0.0187084	-0.00599514
Time spend outdoors in summer	0.00594111	-0.00091895	0.0128012	0.68868	Sun exposure	Lifestyle	1050	Sun exposure	0.0108386	0.0127749	0.00589952	0.0196502
Pork intake	-0.00574884	-0.0124562	0.000958525	0.699252	Diet	Lifestyle	1389	Diet	0.325864	-0.00735199	-0.0140584	-0.000645585
MET minutes per week for vigorous activity	0.00599582	-0.00100769	0.0129993	0.699252	MET Scores	Lifestyle	22039	Physical activity	0.0331692	0.0117134	0.00470618	0.0187206
Age started smoking in former smokers	0.00536424	-0.00143244	0.0121609	0.77012	Smoking	Lifestyle	2867	Smoking	0.244018	0.00823862	0.00143325	0.015044
Alcohol usually taken with meals	0.00826323	-0.00229859	0.0188245	0.783714	Alcohol	Lifestyle	1618	Alcohol	0.981903	0.000700024	-0.00983768	0.0112414
Sleep duration	0.00471916	-0.00149639	0.0109347	0.792609	Sleep	Lifestyle	1160	Sleep	0.561815	0.00495891	-0.00125272	0.0111705
Frequency of memory loss due to drinking alcohol in last year	-0.0176575	-0.0414976	0.0061826	0.805116	Alcohol use	Lifestyle	20408	Mental health	0.508287	-0.0211882	-0.045186	0.00280963
Duration of vigorous activity	0.0033684	-0.00122784	0.00796463	0.805116	Physical activity	Lifestyle	914	Physical activity	0.373955	0.00474459	0.000144639	0.00934454
Age first had sexual intercourse	-0.00238498	-0.00590316	0.0011332	0.805116	Sexual factors	Lifestyle	2139	Sexual factors	0.00225369	-0.00738348	-0.0109025	-0.00386442
Non-oily fish intake	0.00410399	-0.0023466	0.0105546	0.808415	Diet	Lifestyle	1339	Diet	0.000553397	0.0146784	0.00822749	0.0211293
Types of physical activity in last 4 weeks: Other exercises (eg: swimming, cycling, keep fit, bowling)	0.00429142	-0.0025899	0.0111729	0.817784	Physical activity	Lifestyle	6164#2	Physical activity	0.436494	0.00663843	-0.000242577	0.0135195
Age stopped smoking	0.00384286	-0.00272732	0.010413	0.83724	Smoking	Lifestyle	2897	Smoking	0.00275954	0.0135823	0.00700738	0.0201573
Number of days/week of vigorous physical activity 10+ minutes	0.00354438	-0.00270619	0.00979494	0.848413	Physical activity	Lifestyle	904	Physical activity	0.0114381	0.0115599	0.00530877	0.0178111
Oily fish intake	0.00348786	-0.0027602	0.00973592	0.858105	Diet	Lifestyle	1329	Diet	0.0743121	0.00943709	0.00318388	0.0156903
Why stopped smoking: Health precaution	0.00796278	-0.00634646	0.0222712	0.858105	Smoking	Lifestyle	6157#3	Smoking	0.0253086	0.024637	0.0103136	0.0389681
Water intake	0.00367648	-0.00297067	0.0103236	0.858105	Diet	Lifestyle	1528	Diet	0.311435	0.00741669	0.000766363	0.014067
Drive faster than motorway speed limit	0.00362088	-0.00326103	0.0105028	0.863057	Physical activity	Lifestyle	1100	Physical activity	0.120272	-0.00968733	-0.0165755	-0.00279916
Hot drink temperature	-0.00373472	-0.0109422	0.00347279	0.866154	Diet	Lifestyle	1518	Diet	0.00424249	0.0144259	0.00721647	0.0216353
Types of physical activity in last 4 weeks	0.00745933	-0.00739229	0.0223174	0.87359	Physical activity	Lifestyle	6164#100	Physical activity	0.963162	-0.00206012	-0.0169267	0.0127876
Alcohol intake frequency.	-0.00302403	-0.0090785	0.00303044	0.874555	Alcohol	Lifestyle	1558	Alcohol	0.835144	0.0026602	-0.00338675	0.00870716
Lifetime number of sexual partners	0.00324088	-0.0038137	0.0102955	0.892373	Sexual factors	Lifestyle	2149	Sexual factors	0.0053167	0.0139075	0.00685338	0.0209617
Time spent using computer	-0.00294501	-0.0101243	0.00423427	0.918653	Physical activity	Lifestyle	1080	Physical activity	0.981033	-0.000513932	-0.00769089	0.00666302
Number of unsuccessful stop-smoking attempts	0.00484777	-0.00848961	0.0181852	0.934511	Smoking	Lifestyle	2926	Smoking	0.00333908	0.0272462	0.0138566	0.0406358
Types of transport used (excluding work): Walk	-0.00246879	-0.00930565	0.00436803	0.936245	Physical activity	Lifestyle	6162#2	Physical activity	0.795346	-0.0034183	-0.0102551	0.00341841
Time spent watching television (TV)	-0.00234527	-0.00919398	0.00450344	0.945178	Physical activity	Lifestyle	1070	Physical activity	0.388076	0.00695532	0.00010934	0.0138013
Beef intake	-0.00214502	-0.00852801	0.00423797	0.947491	Diet	Lifestyle	1369	Diet	0.991238	0.000212391	-0.00616969	0.00659447
Morning/evening person (chronotype)	0.00199573	-0.00455483	0.00854629	0.947491	Sleep	Lifestyle	1180	Sleep	0.562708	0.00522232	-0.00133342	0.011778
Frequency of light DIY in last 4 weeks	-0.00251501	-0.0110161	0.00598613	0.947491	Physical activity	Lifestyle	1011	Physical activity	0.400148	0.00854654	3.46445e-05	0.0170584
MET minutes per week for moderate activity	-0.000949908	-0.00471417	0.00281435	0.953073	MET Scores	Lifestyle	22038	Physical activity	0.20519	0.00475847	0.000990581	0.00852636
Number of days/week of moderate physical activity 10+ minutes	-0.0015301	-0.00763719	0.00457699	0.953073	Physical activity	Lifestyle	884	Physical activity	0.00853002	0.011597	0.00548371	0.0177103
Types of transport used (excluding work): Cycle	-0.00324861	-0.0164845	0.009992	0.953073	Physical activity	Lifestyle	6162#4	Physical activity	0.969149	-0.00153942	-0.0147909	0.011698
Lamb/mutton intake	-0.00158487	-0.00826378	0.00509404	0.957042	Diet	Lifestyle	1379	Diet	0.396292	-0.00673133	-0.0134095	-5.31756e-05
Types of transport used (excluding work): Car/motor vehicle	-0.00136909	-0.00998529	0.00724563	0.973559	Physical activity	Lifestyle	6162#1	Physical activity	0.79752	-0.00427982	-0.0128899	0.00433449
IPAQ activity group	0.000978581	-0.00609466	0.00805182	0.973559	MET Scores	Lifestyle	22032	Physical activity	0.439348	0.00679958	-0.000277668	0.0138768
Average weekly beer plus cider intake	-0.00110404	-0.00955902	0.00735094	0.973559	Alcohol	Lifestyle	1588	Alcohol	0.616984	0.00621878	-0.00223303	0.0146706
Duration walking for pleasure	0.000912362	-0.00629711	0.00812184	0.973902	Physical activity	Lifestyle	981	Physical activity	0.778079	-0.00376068	-0.0109788	0.00345742
Never eat eggs, dairy, wheat, sugar: Wheat products	0.00253688	-0.018977	0.0240648	0.976199	Diet	Lifestyle	6144#3	Diet	1.21149e-15	-0.0961601	-0.117976	-0.0743852
Ever smoked	0.000806272	-0.00622149	0.00783374	0.976199	Smoking	Lifestyle	20160	Smoking	0.625936	0.00504148	-0.00198853	0.0120726
Dried fruit intake	0.000749236	-0.0063222	0.00782068	0.976199	Diet	Lifestyle	1319	Diet	0.513076	0.00605944	-0.00100972	0.0131286
Salt added to food	0.000664927	-0.00597655	0.0073064	0.977285	Diet	Lifestyle	1478	Diet	0.926996	0.00166226	-0.00498514	0.00830967
Summed minutes activity	-0.000307688	-0.00408854	0.00347317	0.977642	MET Scores	Lifestyle	22034	Physical activity	0.275859	0.00438098	0.000596473	0.00816549
Summed days activity	-0.00025556	-0.00398374	0.00347262	0.979018	MET Scores	Lifestyle	22033	Physical activity	0.133754	0.00514123	0.00141011	0.00887235
Getting up in morning	-0.000384294	-0.00689551	0.00612692	0.980078	Sleep	Lifestyle	1170	Sleep	0.153751	-0.00876343	-0.0152742	-0.00225263
Past tobacco smoking	-0.000158604	-0.00668622	0.00636902	0.992919	Smoking	Lifestyle	1249	Smoking	0.607242	-0.00488398	-0.0114132	0.00164523
Average total household income before tax	0.0162402	0.00964919	0.0228312	0.000267888	Household	Sociodemographics	738	Sociodemographics	0.651248	-0.00452998	-0.0111274	0.00206748
Job code - historical: Labourers in process and plant operations n.e.c.	-0.131812	-0.195966	-0.0675204	0.00725982	Employment history	Sociodemographics	22617#9139	Sociodemographics	0.288734	-0.0745177	-0.139947	-0.00946736
Employment score (England)	-0.00740669	-0.0110346	-0.00377876	0.00746357	Indices of Multiple Deprivation	Sociodemographics	26412	Sociodemographics	0.963162	0.000521908	-0.00310295	0.00414676
Income score (England)	-0.00717295	-0.0108035	-0.00354241	0.0113954	Indices of Multiple Deprivation	Sociodemographics	26411	Sociodemographics	0.930509	0.000821076	-0.00280638	0.00444853
Education score (England)	-0.00663417	-0.0102699	-0.00299839	0.0324509	Indices of Multiple Deprivation	Sociodemographics	26414	Sociodemographics	0.981033	0.000288337	-0.00334434	0.00392101
Job coding: vocational or industrial trainer/instructor	-0.365674	-0.567856	-0.161606	0.0380689	Employment history	Sociodemographics	22601#35633247	Sociodemographics	0.964461	0.0189387	-0.135628	0.171171
Relative age of first facial hair	-0.0221216	-0.0349589	-0.00928425	0.0583952	Male-specific factors	Sociodemographics	2375	Sociodemographics	0.00633812	-0.0249957	-0.0378369	-0.0121546
Job coding: sewing machinist	-0.157231	-0.249236	-0.0649204	0.0633517	Employment history	Sociodemographics	22601#81372713	Sociodemographics	0.361307	-0.0987786	-0.193467	-0.00485982
Job code - historical: Sewing machinists	-0.157231	-0.249236	-0.0649204	0.0633517	Employment history	Sociodemographics	22617#8137	Sociodemographics	0.361307	-0.0987786	-0.193467	-0.00485982
Index of Multiple Deprivation (England)	-0.00613077	-0.00976123	-0.00250032	0.0702243	Indices of Multiple Deprivation	Sociodemographics	26410	Sociodemographics	0.989851	0.000166569	-0.00346078	0.00379392
Job coding: rehabilitation unit manager, children's home manager	0.433353	0.163168	0.704549	0.114613	Employment history	Sociodemographics	22601#11853101	Sociodemographics	0.173539	0.32953	0.0732014	0.577259
Job coding: director or chief executive of private organisation/company, company chairman or president, general manager	0.0635383	0.0237662	0.103364	0.114613	Employment history	Sociodemographics	22601#11123211	Sociodemographics	0.246169	0.0475863	0.00810757	0.0869216
Job code - historical: Directors and chief executives of major organisations	0.0635383	0.0237662	0.103364	0.114613	Employment history	Sociodemographics	22617#1112	Sociodemographics	0.246169	0.0475863	0.00810757	0.0869216
How are people in household related to participant: Husband, wife or partner	0.0125795	0.00469769	0.0204606	0.114613	Household	Sociodemographics	6141#1	Sociodemographics	0.900842	-0.00228272	-0.0101638	0.00560124
Job coding: veterinary nurse or assistant, animal technician	0.378234	0.139187	0.618409	0.124944	Employment history	Sociodemographics	22601#61312509	Sociodemographics	0.793704	0.184273	-0.189633	0.541303
Number of children fathered	0.0157752	0.00520238	0.0263479	0.177611	Male-specific factors	Sociodemographics	2405	Sociodemographics	0.527686	0.00883382	-0.00173585	0.0194035
Job code - historical: Crane drivers	-0.464573	-0.775454	-0.149221	0.185035	Employment history	Sociodemographics	22617#8221	Sociodemographics	0.316355	-0.371487	-0.710057	-0.0391696
Job coding: stores/warehouse porter	0.258985	0.0833429	0.435305	0.192065	Employment history	Sociodemographics	22601#91493354	Sociodemographics	0.562708	0.134397	-0.0382485	0.303813
Health score (England)	-0.00525396	-0.00887399	-0.00163393	0.207036	Indices of Multiple Deprivation	Sociodemographics	26413	Sociodemographics	0.883229	0.00118537	-0.00243154	0.00480228
Job coding: rail line inspector	0.553437	0.171436	0.935685	0.208014	Employment history	Sociodemographics	22601#82162633	Sociodemographics	0.252592	0.418188	0.0601982	0.758712
Job coding: other work in this industry: factory hand, mate, assistant, handler, loader, finisher	-0.252595	-0.428584	-0.0753021	0.210109	Employment history	Sociodemographics	22601#91392721	Sociodemographics	0.719309	-0.10931	-0.292473	0.0710149
Job coding: childminder, au pair, children's nanny	0.129874	0.0379754	0.222034	0.223176	Employment history	Sociodemographics	22601#61223105	Sociodemographics	0.97024	0.0111004	-0.0876367	0.108901
Job coding: other work in this industry: factory hand, mate, assistant, handler, loader	-0.318457	-0.546179	-0.0884505	0.242687	Employment history	Sociodemographics	22601#91392813	Sociodemographics	0.993648	-0.00568731	-0.329507	0.308405
Distance (Euclidean) to coast	-0.00430827	-0.00755927	-0.00105727	0.314025	Greenspace and coastal proximity	Sociodemographics	24508	Sociodemographics	0.361307	-0.0034052	-0.00665638	-0.00015403
Number in household	0.00841014	0.00178563	0.0150346	0.386148	Household	Sociodemographics	709	Sociodemographics	0.986741	0.000371838	-0.00625043	0.0069941
Job coding: receptionist, doctor's/dental receptionist	-0.0770188	-0.137988	-0.0159299	0.397359	Employment history	Sociodemographics	22601#42163303	Sociodemographics	0.849594	-0.046051	-0.160757	0.0674669
Living environment score (England)	-0.0045808	-0.00821575	-0.000945846	0.397359	Indices of Multiple Deprivation	Sociodemographics	26417	Sociodemographics	0.764777	-0.00194834	-0.00558015	0.00168346
Water percentage, buffer 1000m	-0.00451536	-0.00812238	-0.000908339	0.40384	Greenspace and coastal proximity	Sociodemographics	24502	Sociodemographics	0.15478	-0.00483598	-0.00844044	-0.00123152
Job coding: driveway paver or asphalter	-0.484123	-0.868608	-0.0930887	0.405472	Employment history	Sociodemographics	22601#81422589	Sociodemographics	0.617889	-0.3027	-0.724404	0.107894
Job coding: packer, wrapper, foreman	-0.464646	-0.838425	-0.0838677	0.416969	Employment history	Sociodemographics	22601#91342744	Sociodemographics	0.963162	-0.0332537	-0.271807	0.200135
Distance between home and job workplace	0.00590074	0.00107494	0.0107265	0.428677	Employment	Sociodemographics	796	Sociodemographics	0.509196	0.00421879	-0.000603441	0.00904102
Job coding: customer care/relations manager, help desk manager	-0.118158	-0.216333	-0.0196307	0.444855	Employment history	Sociodemographics	22601#11423230	Sociodemographics	0.871065	0.0694163	-0.126827	0.261745
Workplace very noisy	-0.0207237	-0.0381	-0.00334308	0.452208	Employment history	Sociodemographics	22606#2	Sociodemographics	0.930509	-0.00312313	-0.0167741	0.0105297
Job code - historical: Civil engineers	0.079376	0.0116492	0.147253	0.494755	Employment history	Sociodemographics	22617#2121	Sociodemographics	0.161266	0.0884497	0.0217363	0.154716
Job code - historical: Agricultural and fishing trades n.e.c.	0.230933	0.033271	0.429477	0.495814	Employment history	Sociodemographics	22617#5119	Sociodemographics	0.845863	0.0814785	-0.114777	0.273656
Job coding: personnel or industrial relations officer, recruitment consultant	-0.285315	-0.530461	-0.0374376	0.49593	Employment history	Sociodemographics	22601#35623260	Sociodemographics	0.981033	0.0151538	-0.182485	0.209
Job coding: crane driver/operator, gantry operator, banksman (coalmine, salt works)	-0.491627	-0.913857	-0.0614473	0.49593	Employment history	Sociodemographics	22601#82212617	Sociodemographics	0.204003	-0.587046	-1.05413	-0.127898
Job coding: merchandiser, window dresser	-0.168614	-0.314442	-0.0219534	0.49593	Employment history	Sociodemographics	22601#71253330	Sociodemographics	0.0384841	-0.249873	-0.402821	-0.0985548
Job code - historical: Merchandisers and window dressers	-0.168614	-0.314442	-0.0219534	0.49593	Employment history	Sociodemographics	22617#7125	Sociodemographics	0.0384841	-0.249873	-0.402821	-0.0985548
Job coding: restaurant/canteen cashier	0.318688	0.0416204	0.597403	0.498057	Employment history	Sociodemographics	22601#71123388	Sociodemographics	0.154604	0.346948	0.0841187	0.600622
Job coding: librarian, assistant librarian	-0.184317	-0.344714	-0.0228892	0.498057	Employment history	Sociodemographics	22601#24513035	Sociodemographics	0.449806	-0.105971	-0.217914	0.00492004
Job coding: ship's engineer, ship's purser	-0.186985	-0.350705	-0.0222739	0.498057	Employment history	Sociodemographics	22601#35132648	Sociodemographics	0.466037	-0.158522	-0.328308	0.00900102
Consecutive night shifts during mixed shift periods	-0.016609	-0.0311998	-0.00201814	0.498057	Employment history	Sociodemographics	22644	Sociodemographics	0.0645431	-0.0224698	-0.0370877	-0.00785183
Job coding: dental technician, dental hygienist	-0.25451	-0.477424	-0.0294097	0.498057	Employment history	Sociodemographics	22601#32183089	Sociodemographics	0.795346	-0.116019	-0.3498	0.113326
Job code - historical: Receptionists	-0.0615871	-0.115825	-0.00725708	0.498183	Employment history	Sociodemographics	22617#4216	Sociodemographics	0.466037	-0.0515895	-0.106611	0.00316216
Job coding: heavy goods vehicle (hgv) driver, lorry or truck driver, tanker driver, haulage driver	-0.0894184	-0.168732	-0.00989568	0.498848	Employment history	Sociodemographics	22601#82112603	Sociodemographics	0.344095	-0.085907	-0.166854	-0.00552867
Job coding: fruit and vegetable picker, hedger and ditcher	0.448635	0.0513699	0.848741	0.498848	Employment history	Sociodemographics	22601#91192481	Sociodemographics	0.931911	0.0860926	-0.308231	0.463247
Job coding: kennel/cattery owner	0.476298	0.0534357	0.901154	0.498848	Employment history	Sociodemographics	22601#12192510	Sociodemographics	0.883229	0.134296	-0.282814	0.532637
Job coding: cleaner, industrial cleaner	0.70224	0.074936	1.32367	0.498848	Employment history	Sociodemographics	22601#91322706	Sociodemographics	0.238753	0.666691	0.097355	1.19372
Job code - historical: Electrical engineers	-0.0884695	-0.167282	-0.00945457	0.498848	Employment history	Sociodemographics	22617#2123	Sociodemographics	0.42377	-0.0782986	-0.15836	0.00118199
Job coding: housing officer, welfare officer, refuge/rescue worker, probation assistant, nspcc inspector, day centre supervisor	-0.139012	-0.26302	-0.0144122	0.502528	Employment history	Sociodemographics	22601#32323111	Sociodemographics	0.80985	0.0596586	-0.0654682	0.183181
Ever had hysterectomy (womb removed)	0.0203938	0.00197815	0.0388189	0.517044	Female-specific factors	Sociodemographics	3591	Sociodemographics	0.126942	0.0255733	0.00717683	0.0439469
Job coding: school/student counsellor, school attendance officer	-0.216404	-0.411459	-0.0197427	0.518945	Employment history	Sociodemographics	22601#32323410	Sociodemographics	0.964461	-0.0257938	-0.227155	0.171881
Age started hormone-replacement therapy (HRT)	-0.00813599	-0.0155013	-0.00077063	0.518945	Female-specific factors	Sociodemographics	3536	Sociodemographics	0.845863	-0.0030479	-0.0104424	0.00434659
Job code - historical: Managers in animal husbandry, forestry and fishing n.e.c.	0.276238	0.0247554	0.529098	0.5301	Employment history	Sociodemographics	22617#1219	Sociodemographics	0.9753	0.0255614	-0.22524	0.270131
Job code - historical: Veterinary nurses and assistants	0.185095	0.0163047	0.354638	0.530535	Employment history	Sociodemographics	22617#6131	Sociodemographics	0.867488	0.0612127	-0.107036	0.226607
Job coding: hotel and other accommodation porter, bell hop	-0.247889	-0.476086	-0.0175412	0.544253	Employment history	Sociodemographics	22601#92223394	Sociodemographics	0.999406	0.000940538	-0.234767	0.231263
Job coding: other work in this industry: factory hand, mate, assistant, handler, loader	-0.491648	-0.945386	-0.0283036	0.544253	Employment history	Sociodemographics	22601#91392792	Sociodemographics	0.993648	-0.00568731	-0.329507	0.308405
Breathing problems responsible for leaving job: Yes	-0.108357	-0.209246	-0.00709633	0.544253	Employment history	Sociodemographics	22619#1	Sociodemographics	0.964461	0.0125718	-0.0893284	0.113445
Number of live births	0.00912102	0.000611723	0.0176303	0.544253	Female-specific factors	Sociodemographics	2734	Sociodemographics	0.26956	0.00992357	0.00141036	0.0184368
Job coding: secondary school teacher or teaching professional (including head teacher)	0.0266011	0.00179271	0.0514292	0.544253	Employment history	Sociodemographics	22601#23143401	Sociodemographics	0.746161	0.0139403	-0.0107832	0.038615
Job code - historical: Secondary education teaching professionals	0.0266011	0.00179271	0.0514292	0.544253	Employment history	Sociodemographics	22617#2314	Sociodemographics	0.746161	0.0139403	-0.0107832	0.038615
Job coding: energy plant operator, stoker, boiler operator, substation or power station attendant	-0.217287	-0.419242	-0.0137776	0.544253	Employment history	Sociodemographics	22601#81242853	Sociodemographics	0.617889	-0.151925	-0.362303	0.0550123
Job code - historical: Energy plant operatives	-0.217287	-0.419242	-0.0137776	0.544253	Employment history	Sociodemographics	22617#8124	Sociodemographics	0.617889	-0.151925	-0.362303	0.0550123
Job code - historical: Vocational and industrial trainers and instructors	-0.0691492	-0.133964	-0.00418629	0.552297	Employment history	Sociodemographics	22617#3563	Sociodemographics	0.868296	-0.02379	-0.0893415	0.04136
Job coding: driving instructor, hgv instructor	-0.189535	-0.367982	-0.00976193	0.559978	Employment history	Sociodemographics	22601#82152612	Sociodemographics	0.527993	-0.154356	-0.340661	0.0292605
Job code - historical: Driving instructors	-0.189535	-0.367982	-0.00976193	0.559978	Employment history	Sociodemographics	22617#8215	Sociodemographics	0.527993	-0.154356	-0.340661	0.0292605
Job code - historical: Leisure and travel service occupations n.e.c.	0.160779	0.00905928	0.313148	0.559978	Employment history	Sociodemographics	22617#6219	Sociodemographics	0.928819	0.0349508	-0.116043	0.183631
Job code - historical: Heavy goods vehicle drivers	-0.0825465	-0.16119	-0.0036983	0.57614	Employment history	Sociodemographics	22617#8211	Sociodemographics	0.364787	-0.0833626	-0.16357	-0.00371452
Job code - historical: Archivists and curators	-0.129621	-0.253326	-0.00532012	0.579452	Employment history	Sociodemographics	22617#2452	Sociodemographics	0.978342	-0.0113449	-0.137347	0.113172
Job coding: animals trainer, including horse, greyhound, etc.	0.348705	0.0132683	0.686621	0.589303	Employment history	Sociodemographics	22601#51192514	Sociodemographics	0.92881	0.0772493	-0.257748	0.400245
Job coding: other assembler, routine operative	0.594091	0.0204793	1.16868	0.589303	Employment history	Sociodemographics	22601#81392730	Sociodemographics	0.993398	-0.00495763	-0.218935	0.204722
Heating type(s) in home	-0.0445424	-0.0877877	-0.00123858	0.589303	Household	Sociodemographics	6140#100	Sociodemographics	0.964461	0.00546301	-0.037986	0.0487415
Job code - historical: Hotel porters	-0.194554	-0.383224	-0.00448476	0.590328	Employment history	Sociodemographics	22617#9222	Sociodemographics	0.95711	-0.0309277	-0.225391	0.16008
Number of pregnancy terminations	0.0171184	0.000426125	0.0338107	0.591071	Female-specific factors	Sociodemographics	3849	Sociodemographics	0.0134485	0.0302805	0.0136431	0.046918
Townsend deprivation index at recruitment	-0.00347684	-0.0068751	-7.8587e-05	0.591142	Baseline characteristics	Sociodemographics	189	Sociodemographics	0.878523	0.00118484	-0.00221367	0.00458335
Job coding: chiropodist, podiatrist	-0.181715	-0.362031	-0.000162961	0.612692	Employment history	Sociodemographics	22601#32153081	Sociodemographics	0.649791	-0.129127	-0.316909	0.0558095
Job code - historical: Chiropodists	-0.181715	-0.362031	-0.000162961	0.612692	Employment history	Sociodemographics	22617#3215	Sociodemographics	0.649791	-0.129127	-0.316909	0.0558095
Job coding: manager in mining, energy production or water supply	0.121573	-0.000484384	0.244068	0.626745	Employment history	Sociodemographics	22601#11232861	Sociodemographics	0.75297	0.06666	-0.0539982	0.185783
Number of vehicles in household	0.006285	-9.43981e-05	0.0126644	0.633869	Household	Sociodemographics	728	Sociodemographics	0.975541	0.000627789	-0.00575285	0.00700843
Job coding: routine inspector, tester	-0.427824	-0.857343	0.0117613	0.635081	Employment history	Sociodemographics	22601#81332826	Sociodemographics	0.993648	-0.00484402	-0.266026	0.249885
Job coding: conference/events/exhibition manager	0.224171	-0.00476817	0.454212	0.641978	Employment history	Sociodemographics	22601#12223226	Sociodemographics	0.34775	0.233701	0.0105962	0.450774
Job code - historical: Retail and wholesale managers	-0.0478581	-0.0969875	0.0013506	0.644262	Employment history	Sociodemographics	22617#1163	Sociodemographics	0.981033	-0.00371502	-0.0532024	0.0455454
Qualifications: CSEs or equivalent	-0.010282	-0.0208645	0.0003024	0.644262	Education	Sociodemographics	6138#4	Sociodemographics	0.9753	0.00107786	-0.00951654	0.0116661
Job coding: publican or manager of licensed premises, licensee, wine bar manager	-0.0988829	-0.200933	0.00355789	0.644262	Employment history	Sociodemographics	22601#12243390	Sociodemographics	0.964461	0.0755169	-0.550925	0.66001
Job coding: electrical engineer, generating engineer, power engineer, power transmission engineer	-0.182531	-0.370713	0.00701213	0.644262	Employment history	Sociodemographics	22601#21232866	Sociodemographics	0.675811	-0.0597789	-0.152096	0.0317513
Job coding: gaming club/casino inspector	-0.505461	-1.02144	0.0241668	0.644262	Employment history	Sociodemographics	22601#35663193	Sociodemographics	0.537644	-0.468065	-1.04124	0.0909933
Attendance/disability/mobility allowance: Attendance allowance	0.040995	-0.00142672	0.0834711	0.644262	Other sociodemographic factors	Sociodemographics	6146#1	Sociodemographics	0.766938	0.0224194	-0.0198955	0.0645581
Age at first live birth	-0.00530425	-0.0107988	0.000190288	0.644262	Female-specific factors	Sociodemographics	2754	Sociodemographics	0.445028	-0.00524279	-0.0107298	0.000244175
Job coding: civil engineer, transport engineer, structural engineer, borough surveyor	0.105818	-0.00484414	0.216869	0.655204	Employment history	Sociodemographics	22601#21213038	Sociodemographics	0.316075	0.119665	0.011019	0.227027
Job coding: public relations manager, media director, publicity manager	-0.200244	-0.409154	0.0105054	0.655204	Employment history	Sociodemographics	22601#11343163	Sociodemographics	0.668084	-0.143533	-0.362311	0.0714846
Job coding: other work in this industry: factory hand, mate, assistant, handler, loader	-0.159006	-0.325646	0.00870011	0.655204	Employment history	Sociodemographics	22601#91392832	Sociodemographics	0.993648	-0.00568731	-0.329507	0.308405
Job coding: other assembler, routine operative	0.152144	-0.00786153	0.312857	0.658616	Employment history	Sociodemographics	22601#81392831	Sociodemographics	0.993398	-0.00495763	-0.218935	0.204722
Job code - historical: Database assistants/clerks	-0.0758276	-0.156044	0.00461512	0.662946	Employment history	Sociodemographics	22617#4136	Sociodemographics	0.610764	-0.0606579	-0.142416	0.0205107
Ever had stillbirth, spontaneous miscarriage or termination	0.00949242	-0.00057124	0.0195577	0.662946	Female-specific factors	Sociodemographics	2774	Sociodemographics	0.539495	0.00828013	-0.00178342	0.0183405
Age completed full time education	-0.00728282	-0.0150349	0.000469221	0.662946	Education	Sociodemographics	845	Sociodemographics	9.83825e-05	-0.0191538	-0.0268936	-0.011414
Job code - historical: Managers in mining and energy	0.108307	-0.00678198	0.223791	0.662946	Employment history	Sociodemographics	22617#1123	Sociodemographics	0.82553	0.0523125	-0.061669	0.164941
Job coding: it user support technician, help desk or helpline operator (computing), support technician (computing), systems support officer	-0.0723599	-0.149283	0.00477386	0.662946	Employment history	Sociodemographics	22601#31323061	Sociodemographics	0.55174	-0.0634019	-0.14201	0.0146682
Job code - historical: IT user support technicians	-0.0723599	-0.149283	0.00477386	0.662946	Employment history	Sociodemographics	22617#3132	Sociodemographics	0.55174	-0.0634019	-0.14201	0.0146682
Job coding: other work in this industry: factory hand, mate, assistant, handler, loader	-0.191261	-0.394194	0.0133736	0.664017	Employment history	Sociodemographics	22601#91392708	Sociodemographics	0.993648	-0.00568731	-0.329507	0.308405
Job coding: electrical or electronics technician, signals officer	-0.0815814	-0.168599	0.00569159	0.664546	Employment history	Sociodemographics	22601#31123049	Sociodemographics	0.954298	-0.0154113	-0.103291	0.0717353
Job code - historical: Publicans and managers of licensed premises	-0.0938419	-0.194561	0.00725508	0.664546	Employment history	Sociodemographics	22617#1224	Sociodemographics	0.661643	-0.0694764	-0.172583	0.0326942
Job coding: sales or marketing manager/director, export/import manager, business development manager, advertising/commercial manager	0.0413461	-0.00329038	0.0860484	0.664546	Employment history	Sociodemographics	22601#11323222	Sociodemographics	0.110172	0.0630719	0.0187575	0.107201
Job code - historical: Marketing and sales managers	0.0413461	-0.00329038	0.0860484	0.664546	Employment history	Sociodemographics	22617#1132	Sociodemographics	0.110172	0.0630719	0.0187575	0.107201
Job coding: leather worker, shoe maker/repairer, clicker, laster, saddler	0.3772	-0.0286539	0.786367	0.664546	Employment history	Sociodemographics	22601#54132879	Sociodemographics	0.858999	0.147282	-0.25103	0.527444
Job code - historical: Leather and related trades	0.3772	-0.0286539	0.786367	0.664546	Employment history	Sociodemographics	22617#5413	Sociodemographics	0.858999	0.147282	-0.25103	0.527444
Job coding: electrical/electronics technician	0.302098	-0.0233114	0.629447	0.664546	Employment history	Sociodemographics	22601#31122687	Sociodemographics	0.856942	-0.126698	-0.458757	0.19648
Job involves heavy manual or physical work	-0.0086474	-0.0180065	0.000711653	0.664546	Employment	Sociodemographics	816	Sociodemographics	0.981033	-0.000665635	-0.0100351	0.00870383
Job coding: textile, cloth or soft furnishings designer	0.288421	-0.023749	0.602555	0.664546	Employment history	Sociodemographics	22601#34223155	Sociodemographics	0.850159	0.121595	-0.18772	0.420953
Job code - historical: Furniture makers, other craft woodworkers	0.144924	-0.0122714	0.302814	0.664546	Employment history	Sociodemographics	22617#5492	Sociodemographics	0.748484	0.0866894	-0.0687133	0.239494
Job coding: retail or wholesale shop manager, showroom manager	-0.0457938	-0.0955788	0.00407297	0.664546	Employment history	Sociodemographics	22601#11633322	Sociodemographics	0.976686	-0.00476949	-0.0549251	0.0451529
Job coding: database assistant/clerk, computer clerk, data entry clerk/processor, book keeping/accounts machinist	-0.0877121	-0.183019	0.00792109	0.664546	Employment history	Sociodemographics	22601#41363318	Sociodemographics	0.869369	-0.0532623	-0.202769	0.0942077
Job coding: pensions and insurance clerk/administrator, claims handler	0.0530062	-0.0046475	0.110768	0.664546	Employment history	Sociodemographics	22601#41323255	Sociodemographics	0.993398	0.0013888	-0.0563529	0.0588157
Job code - historical: Pensions and insurance clerks	0.0530062	-0.0046475	0.110768	0.664546	Employment history	Sociodemographics	22617#4132	Sociodemographics	0.993398	0.0013888	-0.0563529	0.0588157
Job code - historical: Other goods handling and storage occupations n.e.c.	0.0530818	-0.00467596	0.11095	0.664546	Employment history	Sociodemographics	22617#9149	Sociodemographics	0.976686	0.00539886	-0.0524835	0.062976
Age at last live birth	-0.00506135	-0.0105746	0.000451905	0.664546	Female-specific factors	Sociodemographics	2764	Sociodemographics	0.492099	-0.0049705	-0.0104757	0.000534701
Education score (Wales)	-0.0150701	-0.0314947	0.0013545	0.664546	Indices of Multiple Deprivation	Sociodemographics	26421	Sociodemographics	0.798621	-0.00816517	-0.0246991	0.00836881
Job coding: other work in this industry: factory hand, mate, assistant, handler, loader	-0.210398	-0.438822	0.0201461	0.664546	Employment history	Sociodemographics	22601#91392822	Sociodemographics	0.993648	-0.00568731	-0.329507	0.308405
Job coding: welder	0.337205	-0.0309384	0.707472	0.664546	Employment history	Sociodemographics	22601#52152689	Sociodemographics	0.963162	0.0493866	-0.318507	0.403811
Job coding: accounts and wages clerk/assistant/supervisor, bookkeeper, cost or ledger clerk, audit assistant, budget officer, student loans officer, paymaster	-0.0425777	-0.0892887	0.00420257	0.664546	Employment history	Sociodemographics	22601#41223241	Sociodemographics	0.995302	0.000905692	-0.0665883	0.0679665
Index of Multiple Deprivation (Wales)	-0.0149835	-0.0314339	0.00146699	0.664546	Indices of Multiple Deprivation	Sociodemographics	26426	Sociodemographics	0.684638	-0.0106547	-0.0272143	0.00590488
Job coding: railway man, shunter, signalman, pointsman, level crossing keeper	-0.228876	-0.478995	0.0241599	0.664546	Employment history	Sociodemographics	22601#82162625	Sociodemographics	0.890181	-0.0803399	-0.340855	0.174456
Job code - historical: Conference and exhibition managers	0.186162	-0.0180735	0.39142	0.664546	Employment history	Sociodemographics	22617#1222	Sociodemographics	0.280442	0.22611	0.0272195	0.42019
Job coding: archivist, curator, conservator, inspector of ancient monuments, museum officer	-0.152509	-0.319882	0.0160023	0.664546	Employment history	Sociodemographics	22601#24523188	Sociodemographics	0.904472	-0.0488255	-0.221128	0.120831
Job coding: pipe fitter	0.165548	-0.0176174	0.349645	0.666377	Employment history	Sociodemographics	22601#52162926	Sociodemographics	0.961543	0.0518834	-0.297021	0.387942
Job coding: refuse or rubbish truck driver	0.494365	-0.0520704	1.04404	0.666377	Employment history	Sociodemographics	22601#82112604	Sociodemographics	0.858894	0.20037	-0.341364	0.711587
Job code - historical: Transport and distribution managers	0.0831718	-0.00909361	0.175702	0.666377	Employment history	Sociodemographics	22617#1161	Sociodemographics	0.929024	0.021325	-0.0707657	0.11259
Job coding: insurance underwriter, insurance inspector, insurance account handler	-0.151536	-0.319559	0.0176195	0.668698	Employment history	Sociodemographics	22601#35333266	Sociodemographics	0.964461	-0.0131649	-0.119199	0.0918004
Job code - historical: Ship and hovercraft officers	-0.0999691	-0.211223	0.011708	0.668902	Employment history	Sociodemographics	22617#3513	Sociodemographics	0.702069	-0.0701205	-0.183453	0.0420541
Job coding: photographer and audio-visual equipment operator, cameraman, film technician, sound or light engineer, projectionist	0.0968548	-0.011318	0.205371	0.668902	Employment history	Sociodemographics	22601#34343161	Sociodemographics	0.530767	0.200489	-0.0438482	0.43769
Job code - historical: Childminders and related occupations	0.0603203	-0.00717554	0.127963	0.668902	Employment history	Sociodemographics	22617#6122	Sociodemographics	0.825873	0.031027	-0.0365109	0.0981311
Job coding: buyer, purchasing/procurement officer, supply officer	0.0909783	-0.0111467	0.193424	0.668902	Employment history	Sociodemographics	22601#35413236	Sociodemographics	0.0518416	0.157543	0.0575718	0.256371
Job code - historical: Buyers and purchasing officers	0.0909783	-0.0111467	0.193424	0.668902	Employment history	Sociodemographics	22617#3541	Sociodemographics	0.0518416	0.157543	0.0575718	0.256371
Age when last used oral contraceptive pill	-0.00478923	-0.0101755	0.000597002	0.668902	Female-specific factors	Sociodemographics	2804	Sociodemographics	0.965627	-0.00065407	-0.00603771	0.00472957
Job coding: waste collector, salvage worker, dustman, recycling operative	0.206152	-0.0250671	0.438629	0.668902	Employment history	Sociodemographics	22601#92353008	Sociodemographics	0.613191	0.166629	-0.060607	0.388196
Job code - historical: Refuse and salvage occupations	0.206152	-0.0250671	0.438629	0.668902	Employment history	Sociodemographics	22617#9235	Sociodemographics	0.613191	0.166629	-0.060607	0.388196
Bilateral oophorectomy (both ovaries removed)	0.0152305	-0.00190621	0.0323756	0.668902	Female-specific factors	Sociodemographics	2834	Sociodemographics	0.400148	0.0171618	5.27761e-05	0.0342486
Job code - historical: Housing and welfare officers	-0.0790878	-0.16812	0.0102284	0.670295	Employment history	Sociodemographics	22617#3232	Sociodemographics	0.410605	0.0879294	-0.00103972	0.176068
Job coding: packer, wrapper, foreman	0.216424	-0.0289835	0.46344	0.67837	Employment history	Sociodemographics	22601#91342825	Sociodemographics	0.963162	-0.0332537	-0.271807	0.200135
Job coding: other assembler, routine operative	-0.420743	-0.894918	0.0632246	0.67837	Employment history	Sociodemographics	22601#81392843	Sociodemographics	0.993398	-0.00495763	-0.218935	0.204722
Place of birth in UK - north co-ordinate	-0.00288258	-0.00617085	0.000405677	0.680395	Early life factors	Sociodemographics	129	Sociodemographics	0.927938	0.000801385	-0.00248658	0.00408935
Job coding: road inspector	0.371701	-0.0514621	0.796277	0.680536	Employment history	Sociodemographics	22601#81422593	Sociodemographics	0.93768	0.0866275	-0.336897	0.492759
Breathing problems improved/stopped away from workplace or on holiday: No	0.0279642	-0.00405937	0.0600209	0.684886	Employment history	Sociodemographics	22618#0	Sociodemographics	0.845863	-0.0132408	-0.0453577	0.018785
Job code - historical: Electrical/electronics technicians	-0.0580556	-0.124526	0.00855639	0.684886	Employment history	Sociodemographics	22617#3112	Sociodemographics	0.830824	-0.0304385	-0.0975575	0.0362651
Workplace had a lot of diesel exhaust	-0.0174521	-0.0375302	0.00263239	0.688185	Employment history	Sociodemographics	22615#1	Sociodemographics	0.800593	-0.0179806	-0.0546466	0.0185695
Job coding: further education teaching professional, college lecturer/professor	0.0363188	-0.00559398	0.0782904	0.68868	Employment history	Sociodemographics	22601#23123400	Sociodemographics	0.623159	0.0299179	-0.0117874	0.0714589
Job code - historical: Further education teaching professionals	0.0363188	-0.00559398	0.0782904	0.68868	Employment history	Sociodemographics	22617#2312	Sociodemographics	0.623159	0.0299179	-0.0117874	0.0714589
Job coding: ambulance staff (not paramedic), ambulance driver, ambulance technician	0.344001	-0.0517274	0.742526	0.68868	Employment history	Sociodemographics	22601#61123090	Sociodemographics	0.126942	0.500823	0.131622	0.850772
Job coding: health and safety officer, occupational hygienist, safety adviser	0.18443	-0.0284137	0.398394	0.68868	Employment history	Sociodemographics	22601#35672697	Sociodemographics	0.982438	-0.0198567	-0.339484	0.290136
Job coding: motor mechanic, auto engineer	-0.111295	-0.240484	0.0184957	0.695247	Employment history	Sociodemographics	22601#52312660	Sociodemographics	0.868357	-0.0473856	-0.178885	0.0825062
Job coding: beautician, make-up artist, manicurist, nail technician	0.231272	-0.0378912	0.502404	0.699252	Employment history	Sociodemographics	22601#62223360	Sociodemographics	0.838736	0.113618	-0.154101	0.373863
Job code - historical: Biological scientists and biochemists	-0.0528024	-0.114693	0.00922054	0.70387	Employment history	Sociodemographics	22617#2112	Sociodemographics	0.332405	-0.0683065	-0.131263	-0.00569982
Job coding: educational assistant, classroom assistant, special needs helper	0.0366595	-0.00637721	0.0797574	0.704092	Employment history	Sociodemographics	22601#61243409	Sociodemographics	0.764777	0.023215	-0.0198376	0.0661015
Job code - historical: Educational assistants	0.0366595	-0.00637721	0.0797574	0.704092	Employment history	Sociodemographics	22617#6124	Sociodemographics	0.764777	0.023215	-0.0198376	0.0661015
Night shifts worked: Shift pattern was worked for some (but not all) of job	-0.062806	-0.136619	0.0111978	0.704363	Employment history	Sociodemographics	22650#0	Sociodemographics	0.672723	0.0481529	-0.0257279	0.121485
Job coding: tailor, dressmaker, milliner	-0.131849	-0.286808	0.0240481	0.704363	Employment history	Sociodemographics	22601#54142880	Sociodemographics	0.764777	-0.0850579	-0.244662	0.0723462
Job code - historical: Tailors and dressmakers	-0.131849	-0.286808	0.0240481	0.704363	Employment history	Sociodemographics	22617#5414	Sociodemographics	0.764777	-0.0850579	-0.244662	0.0723462
Age at hysterectomy	0.00873171	-0.0015837	0.0190471	0.705129	Female-specific factors	Sociodemographics	2824	Sociodemographics	0.479243	0.00947281	-0.000807009	0.0197526
Workplace had a lot of cigarette smoke from other people smoking	0.0115535	-0.00214308	0.0252513	0.70758	Employment history	Sociodemographics	22611#1	Sociodemographics	0.804826	0.00898891	-0.00946482	0.027421
Physical environment score (Wales)	-0.0138435	-0.0303221	0.00263514	0.709862	Indices of Multiple Deprivation	Sociodemographics	26424	Sociodemographics	0.993398	-0.000412139	-0.0170007	0.0161765
Job coding: library assistant/clerk, press cuttings clerk	-0.0681753	-0.149319	0.0131989	0.710137	Employment history	Sociodemographics	22601#41353316	Sociodemographics	0.0837404	-0.123278	-0.206498	-0.0406381
Place of birth in UK - east co-ordinate	-0.00269865	-0.00596209	0.000564791	0.727298	Early life factors	Sociodemographics	130	Sociodemographics	0.845863	0.0013364	-0.00192674	0.00459954
Job coding: biochemist, medical laboratory scientific officer	-0.0780754	-0.172555	0.0167351	0.727422	Employment history	Sociodemographics	22601#21123022	Sociodemographics	0.686126	-0.0616342	-0.158003	0.03391
Gap coding: Paid work for less than 15 hours per week on average or lasting less than 6 months	-0.0153156	-0.0339435	0.00331751	0.728695	Employment history	Sociodemographics	22660#101	Sociodemographics	0.562708	-0.0148579	-0.0335391	0.00380096
Workplace very hot	-0.0177483	-0.0394632	0.00397732	0.733697	Employment history	Sociodemographics	22608#2	Sociodemographics	0.845863	0.00567666	-0.00805919	0.0194157
Job coding: medical technician, audiologist, cardiographer, prosthesist, ecg technician, eeg technician	0.098104	-0.023067	0.219725	0.751907	Employment history	Sociodemographics	22601#32183085	Sociodemographics	0.562708	0.0943476	-0.0255452	0.212721
Job code - historical: Air travel assistants	0.0922973	-0.0218932	0.206881	0.753016	Employment history	Sociodemographics	22617#6214	Sociodemographics	0.76002	0.0617235	-0.0516439	0.173771
Job coding: sales assistant, retail/shop assistant, counter assistant, sub post office assistant, takeaway food worker	-0.0246299	-0.0552598	0.00602597	0.7535	Employment history	Sociodemographics	22601#71113328	Sociodemographics	0.724495	-0.018242	-0.0490622	0.0124964
Job code - historical: Sales and retail assistants	-0.0246299	-0.0552598	0.00602597	0.7535	Employment history	Sociodemographics	22617#7111	Sociodemographics	0.724495	-0.018242	-0.0490622	0.0124964
Job coding: inspector of weights and measures, trading standards officer, hotel/pub inspector, planning inspector	0.340288	-0.0812864	0.765085	0.7535	Employment history	Sociodemographics	22601#35653463	Sociodemographics	0.883395	0.133383	-0.284127	0.531851
Job coding: design and development engineer, ergonomist	-0.0700105	-0.157139	0.0173711	0.7535	Employment history	Sociodemographics	22601#21263044	Sociodemographics	0.349454	-0.093597	-0.182298	-0.00558496
Job coding: mason, stonemason, monumental mason	0.399351	-0.0965329	0.898059	0.7535	Employment history	Sociodemographics	22601#53122525	Sociodemographics	0.941305	0.0975979	-0.393786	0.562987
Job coding: weigher, grader, sorter, picker; weighbridge clerk/controller	-0.250294	-0.561417	0.0649918	0.758464	Employment history	Sociodemographics	22601#81342704	Sociodemographics	0.986741	-0.0306732	-0.592333	0.501866
Job code - historical: Research and development managers	-0.0460216	-0.103638	0.0117032	0.758464	Employment history	Sociodemographics	22617#1137	Sociodemographics	0.616984	-0.0425988	-0.100836	0.015328
Job code - historical: Occupational hygienists and safety officers (health and safety)	0.0885783	-0.0225093	0.200037	0.758464	Employment history	Sociodemographics	22617#3567	Sociodemographics	0.904472	0.0315101	-0.0793324	0.141138
Job coding: other assembler, routine operative	-0.220437	-0.495937	0.0582846	0.758464	Employment history	Sociodemographics	22601#81392740	Sociodemographics	0.993398	-0.00495763	-0.218935	0.204722
Job coding: routine inspector, tester	0.327741	-0.0831303	0.741145	0.759099	Employment history	Sociodemographics	22601#81332745	Sociodemographics	0.993648	-0.00484402	-0.266026	0.249885
Job coding: school secretary	-0.0831565	-0.188441	0.022524	0.771609	Employment history	Sociodemographics	22601#42133300	Sociodemographics	0.0818088	-0.161328	-0.269958	-0.0536572
Job code - historical: School secretaries	-0.0453914	-0.103105	0.0124305	0.776809	Employment history	Sociodemographics	22617#4213	Sociodemographics	0.492099	-0.0526674	-0.111154	0.00551031
Job coding: storesman, warehouseman, porter	-0.299751	-0.680547	0.0877809	0.787003	Employment history	Sociodemographics	22601#91492779	Sociodemographics	0.995302	-0.00517748	-0.412161	0.38687
Job coding: school secretary, clerical assistant, school registry assistant	0.131338	-0.0366246	0.300139	0.787003	Employment history	Sociodemographics	22601#42133407	Sociodemographics	0.823517	-0.0346379	-0.109066	0.0392805
Job coding: ship or hovercraft steward, cabin boy	0.365266	-0.101398	0.835972	0.788381	Employment history	Sociodemographics	22601#62192650	Sociodemographics	0.8902	0.140939	-0.322262	0.580873
Job coding: public relations officer, press officer, information officer, publicity assistant	-0.0802142	-0.183303	0.0232606	0.788381	Employment history	Sociodemographics	22601#34333239	Sociodemographics	0.981033	0.00762016	-0.0966421	0.110829
Workplace had a lot of diesel exhaust	-0.0283039	-0.0647521	0.00818133	0.788381	Employment history	Sociodemographics	22615#2	Sociodemographics	0.800593	-0.0179806	-0.0546466	0.0185695
Job coding: van driver, delivery driver, courier driver	-0.0557495	-0.127785	0.0164602	0.788381	Employment history	Sociodemographics	22601#82122605	Sociodemographics	0.916121	-0.0194152	-0.092225	0.0529041
Job code - historical: Van drivers	-0.0557495	-0.127785	0.0164602	0.788381	Employment history	Sociodemographics	22617#8212	Sociodemographics	0.916121	-0.0194152	-0.092225	0.0529041
Job coding: benefits advisor, citizens advice bureau adviser, debt counsellor	0.137937	-0.0403344	0.317101	0.788381	Employment history	Sociodemographics	22601#32323112	Sociodemographics	0.066635	0.260617	0.088444	0.428994
Day shifts worked: Shift pattern was worked for some (but not all) of job	0.038072	-0.0112255	0.0874494	0.788381	Employment history	Sociodemographics	22630#0	Sociodemographics	0.95711	0.0079013	-0.0414458	0.057019
Job coding: author, writer, biographer, book editor, novelist, dramatist, playwright, poet	0.097893	-0.0288181	0.225102	0.788479	Employment history	Sociodemographics	22601#34123157	Sociodemographics	0.330234	0.135144	0.0102874	0.258253
Job coding: aircraft engineer, aircraft fitter, aircraft ground engineer	0.194431	-0.0569724	0.447416	0.788479	Employment history	Sociodemographics	22601#52232640	Sociodemographics	0.787297	0.287251	-0.295313	0.828045
Job coding: other assembler, routine operative	0.164173	-0.0484696	0.378119	0.788479	Employment history	Sociodemographics	22601#81392720	Sociodemographics	0.993398	-0.00495763	-0.218935	0.204722
Job coding: other work in these industries: attendant, hand, mate, assistant, handler, loader	-0.152599	-0.350154	0.0465674	0.788479	Employment history	Sociodemographics	22601#91392859	Sociodemographics	0.778252	-0.105385	-0.309888	0.0956592
Job code - historical: Authors, writers	0.0919059	-0.0279849	0.212244	0.789365	Employment history	Sociodemographics	22617#3412	Sociodemographics	0.267888	0.13721	0.0191397	0.253709
Job code - historical: Electroplaters	0.311645	-0.0937995	0.720277	0.789365	Employment history	Sociodemographics	22617#8118	Sociodemographics	0.508287	0.331477	-0.0552137	0.698161
Job code - historical: Customer care managers	-0.067167	-0.155221	0.0211595	0.792609	Employment history	Sociodemographics	22617#1142	Sociodemographics	0.927938	-0.021538	-0.110959	0.0671443
Job code - historical: Personnel and industrial relations officers	-0.0413658	-0.095667	0.0130322	0.792609	Employment history	Sociodemographics	22617#3562	Sociodemographics	0.54408	-0.0448277	-0.0998577	0.00993012
Job coding: road construction worker, asphalter, layer, ganger (road), road worker foreman	0.234645	-0.0729165	0.544292	0.792609	Employment history	Sociodemographics	22601#81422572	Sociodemographics	0.975504	-0.0309998	-0.342676	0.271958
Job coding: planning and quality control engineer	0.34625	-0.10785	0.801867	0.792609	Employment history	Sociodemographics	22601#21282685	Sociodemographics	0.942436	0.0883091	-0.366743	0.522151
Adopted as a child	0.0229174	-0.00724958	0.053113	0.792609	Early life factors	Sociodemographics	1767	Sociodemographics	0.130145	0.0414811	0.0114586	0.0714161
Job code - historical: Scaffolders, stagers, riggers	-0.266558	-0.614584	0.0873081	0.792609	Employment history	Sociodemographics	22617#8141	Sociodemographics	0.508046	-0.329877	-0.7056	0.0379627
Workplace very cold	-0.0103342	-0.0239484	0.00327937	0.792609	Employment history	Sociodemographics	22607#1	Sociodemographics	0.890331	-0.00423214	-0.0178479	0.00938198
Job coding: painter, decorator	0.087136	-0.0280171	0.202694	0.796772	Employment history	Sociodemographics	22601#53232556	Sociodemographics	0.922433	0.029398	-0.0856365	0.143148
Job coding: packer, wrapper, foreman	-0.360958	-0.83542	0.122486	0.797906	Employment history	Sociodemographics	22601#91342816	Sociodemographics	0.963162	-0.0332537	-0.271807	0.200135
Job coding: floorer, floor layer, floor or wall tiler, floor polisher	0.244355	-0.0787047	0.569843	0.798082	Employment history	Sociodemographics	22601#53222553	Sociodemographics	0.904561	0.090284	-0.232098	0.402128
Job coding: building site foreman or supervisor	-0.114918	-0.267606	0.0386188	0.799494	Employment history	Sociodemographics	22601#81492535	Sociodemographics	0.95683	-0.0319914	-0.231735	0.163997
Comparative height size at age 10	0.00491137	-0.00167706	0.0114998	0.801693	Early life factors	Sociodemographics	1697	Sociodemographics	0.252592	-0.00787551	-0.0144665	-0.00128454
Job coding: welder	-0.423418	-0.986647	0.156548	0.805116	Employment history	Sociodemographics	22601#52152527	Sociodemographics	0.963162	0.0493866	-0.318507	0.403811
Health score (Wales)	-0.0121351	-0.0285791	0.00430885	0.805116	Indices of Multiple Deprivation	Sociodemographics	26420	Sociodemographics	0.989949	0.000683513	-0.0158699	0.0172369
Job coding: rail construction worker, rail maintenance worker/examiner, plate layer, trackman, foreman-ganger (rail)	-0.391229	-0.916877	0.146986	0.805116	Employment history	Sociodemographics	22601#81432576	Sociodemographics	0.859696	-0.210524	-0.780643	0.336825
Job code - historical: Rail construction and maintenance operatives	-0.391229	-0.916877	0.146986	0.805116	Employment history	Sociodemographics	22617#8143	Sociodemographics	0.859696	-0.210524	-0.780643	0.336825
Job code - historical: Musical instrument makers and tuners	-0.373029	-0.874706	0.140695	0.805116	Employment history	Sociodemographics	22617#5494	Sociodemographics	0.989949	0.0218637	-0.513528	0.530258
Water percentage, buffer 300m	-0.0026424	-0.00624781	0.000963008	0.805116	Greenspace and coastal proximity	Sociodemographics	24505	Sociodemographics	0.466989	-0.00337478	-0.00697763	0.000228069
Job coding: other ambulance staff (not paramedic), ambulance driver, ambulance technician	-0.197004	-0.465248	0.0741928	0.805116	Employment history	Sociodemographics	22601#61123437	Sociodemographics	0.981033	0.020076	-0.255524	0.288334
Job coding: bar staff, cellarman (public house)	-0.0610799	-0.144765	0.0228343	0.805116	Employment history	Sociodemographics	22601#92253391	Sociodemographics	0.513076	-0.0722482	-0.157757	0.0126406
Job code - historical: Bar staff	-0.0610799	-0.144765	0.0228343	0.805116	Employment history	Sociodemographics	22617#9225	Sociodemographics	0.513076	-0.0722482	-0.157757	0.0126406
Job coding: electroplater, anodiser, galvaniser, plater	0.303292	-0.110729	0.720823	0.805116	Employment history	Sociodemographics	22601#81182836	Sociodemographics	0.513076	0.328607	-0.0665852	0.702875
Job coding: pharmacist, pharmacologist, pharmaceutical chemist	-0.0728395	-0.172704	0.0273833	0.805116	Employment history	Sociodemographics	22601#22133068	Sociodemographics	0.55685	-0.0818276	-0.183951	0.0194035
Job code - historical: Pharmacists/pharmacologists	-0.0728395	-0.172704	0.0273833	0.805116	Employment history	Sociodemographics	22617#2213	Sociodemographics	0.55685	-0.0818276	-0.183951	0.0194035
Job coding: careers adviser or vocational guidance specialist, placement advisor	-0.161187	-0.381599	0.0611708	0.805116	Employment history	Sociodemographics	22601#35643215	Sociodemographics	0.986741	-0.0188074	-0.36601	0.317523
Job coding: metal working production or maintenance fitter, machine fitter, fitter and turner, bench fitter, plant fitter	0.0646682	-0.0244225	0.154019	0.805116	Employment history	Sociodemographics	22601#52232929	Sociodemographics	0.981033	0.00669644	-0.0822563	0.0948758
Job coding: primary /junior school teacher or teaching professional, nursery school teacher (including head teacher)	-0.020603	-0.049047	0.00786119	0.805116	Employment history	Sociodemographics	22601#23153402	Sociodemographics	0.719309	-0.0173058	-0.0458421	0.0111642
Job code - historical: Primary and nursery education teaching professionals	-0.020603	-0.049047	0.00786119	0.805116	Employment history	Sociodemographics	22617#2315	Sociodemographics	0.719309	-0.0173058	-0.0458421	0.0111642
Job coding: research and development manager	-0.133526	-0.317901	0.0521368	0.805116	Employment history	Sociodemographics	22601#11373228	Sociodemographics	0.596957	-0.144074	-0.335577	0.0445449
Email access	-0.0119463	-0.0285113	0.00462578	0.805116	Ongoing characteristics	Sociodemographics	20005	Sociodemographics	0.934798	0.00354306	-0.0130314	0.0200949
Job coding: regulation compliance inspector/examiner including fishery or pollution control officer, water bailiff, rspca inspector, refuse inspector	0.348124	-0.132361	0.832338	0.805116	Employment history	Sociodemographics	22601#35663465	Sociodemographics	0.89777	-0.143425	-0.63916	0.333243
Job coding: pharmaceutical dispenser, pharmacy technician	-0.110835	-0.264282	0.0435509	0.805116	Employment history	Sociodemographics	22601#32173088	Sociodemographics	0.845863	-0.065376	-0.223733	0.0908232
Job code - historical: Pharmaceutical dispensers	-0.110835	-0.264282	0.0435509	0.805116	Employment history	Sociodemographics	22617#3217	Sociodemographics	0.845863	-0.065376	-0.223733	0.0908232
Job coding: furniture maker/fitter, cabinet maker	0.122915	-0.047513	0.294139	0.805116	Employment history	Sociodemographics	22601#54922904	Sociodemographics	0.764777	0.0898329	-0.078743	0.255366
Gas or solid-fuel cooking/heating: A gas fire that you use regularly in winter time	-0.00498725	-0.011944	0.00196971	0.805116	Household	Sociodemographics	6139#2	Sociodemographics	0.746839	-0.00392191	-0.0108801	0.00303534
Job coding: storage manager, stock control manager, container terminal manager	-0.108276	-0.259507	0.0438209	0.805116	Employment history	Sociodemographics	22601#11623349	Sociodemographics	0.981033	-0.0112528	-0.165082	0.140335
Job code - historical: Storage and warehouse managers	-0.108276	-0.259507	0.0438209	0.805116	Employment history	Sociodemographics	22617#1162	Sociodemographics	0.981033	-0.0112528	-0.165082	0.140335
Job coding: chemist (analytic, developmental, industrial, research)	-0.0443715	-0.106649	0.0180348	0.805116	Employment history	Sociodemographics	22601#21113020	Sociodemographics	0.984157	-0.00376513	-0.0662907	0.0583853
Job code - historical: Chemists	-0.0443715	-0.106649	0.0180348	0.805116	Employment history	Sociodemographics	22617#2111	Sociodemographics	0.984157	-0.00376513	-0.0662907	0.0583853
Attendance/disability/mobility allowance	-0.0106002	-0.0255785	0.00437155	0.805116	Other sociodemographic factors	Sociodemographics	6146#100	Sociodemographics	0.884455	-0.00482594	-0.0197739	0.0101411
Job coding: railway conductor, train guard	-0.238485	-0.572863	0.100747	0.805116	Employment history	Sociodemographics	22601#62152628	Sociodemographics	0.99432	0.00529353	-0.341549	0.340394
Job code - historical: Transport and distribution clerks	-0.0684488	-0.165049	0.0284802	0.805116	Employment history	Sociodemographics	22617#4134	Sociodemographics	0.848684	-0.0395477	-0.137697	0.0577218
Job coding: commercial/industrial designer	-0.278863	-0.67013	0.118838	0.805116	Employment history	Sociodemographics	22601#34223154	Sociodemographics	0.600595	-0.314172	-0.734907	0.0956862
Work hours - lumped category	0.00999951	-0.00419005	0.0241912	0.805116	Employment history	Sociodemographics	22604#4	Sociodemographics	0.95683	0.00222916	-0.0116273	0.0160883
How are people in household related to participant: Son and/or daughter (include step-children)	0.00573585	-0.00240518	0.0138775	0.805116	Household	Sociodemographics	6141#2	Sociodemographics	0.871107	0.00290487	-0.00523485	0.0110431
Job coding: general office assistant/clerk, clerical officer, clerk-typist, office supervisor, press/newspaper corrector/reader	-0.0231046	-0.0559259	0.00974766	0.805116	Employment history	Sociodemographics	22601#41503307	Sociodemographics	0.806302	0.0159004	-0.0169663	0.0486733
Job code - historical: General office assistants/clerks	-0.0231046	-0.0559259	0.00974766	0.805116	Employment history	Sociodemographics	22617#4150	Sociodemographics	0.806302	0.0159004	-0.0169663	0.0486733
Job code - historical: Advertising and public relations managers	-0.0584472	-0.141552	0.024898	0.805116	Employment history	Sociodemographics	22617#1134	Sociodemographics	0.835144	-0.0370855	-0.121523	0.0467079
Job coding: storesman, warehouseman, porter	-0.281139	-0.677201	0.123234	0.805116	Employment history	Sociodemographics	22601#91492819	Sociodemographics	0.995302	-0.00517748	-0.412161	0.38687
Day shifts worked: Shift pattern was worked for whole of job	-0.0191144	-0.0464573	0.00824889	0.805116	Employment history	Sociodemographics	22630#1	Sociodemographics	0.941361	-0.00556612	-0.0330321	0.0218364
Job coding: estimator, valuer, building estimator/assessor, insurance assessor, costing engineer, surveyor/valuer, lottery officer, rating officer, marine/naval surveyor	0.167299	-0.0713	0.407502	0.805116	Employment history	Sociodemographics	22601#35313257	Sociodemographics	0.963162	-0.0324828	-0.273518	0.203119
Job coding: tool maker, tool fitter, jig and tool fitter, marker out, die sinker	0.0817697	-0.0353603	0.199339	0.805116	Employment history	Sociodemographics	22601#52222928	Sociodemographics	0.869369	0.0415301	-0.074846	0.156508
Job code - historical: Tool makers, tool fitters and markers-out	0.0817697	-0.0353603	0.199339	0.805116	Employment history	Sociodemographics	22617#5222	Sociodemographics	0.869369	0.0415301	-0.074846	0.156508
Job coding: civil engineer	0.065112	-0.0285408	0.159045	0.805116	Employment history	Sociodemographics	22601#21212592	Sociodemographics	0.768568	0.0489489	-0.0440123	0.141034
Job coding: filing clerk, records assistant/clerk, technical clerk, lottery clerk, courts administrator, checker, census enumerator, progress/document controller	-0.0905016	-0.220935	0.0405814	0.805116	Employment history	Sociodemographics	22601#41313317	Sociodemographics	0.33307	-0.144998	-0.279827	-0.0116141
Job coding: electrical engineer	-0.1506	-0.367285	0.0679817	0.805116	Employment history	Sociodemographics	22601#21232680	Sociodemographics	0.964461	0.0279129	-0.19273	0.24357
Job coding: fitness instructor, aerobics teacher, yoga teacher	-0.15937	-0.388798	0.0721232	0.805116	Employment history	Sociodemographics	22601#34433141	Sociodemographics	0.845863	-0.0980262	-0.337827	0.137319
Job code - historical: Fitness instructors	-0.15937	-0.388798	0.0721232	0.805116	Employment history	Sociodemographics	22617#3443	Sociodemographics	0.845863	-0.0980262	-0.337827	0.137319
Job coding: forester, forestry contractor, lumberjack	0.20885	-0.0920854	0.512235	0.805116	Employment history	Sociodemographics	22601#91122491	Sociodemographics	0.999384	-0.001384	-0.303271	0.292344
Job code - historical: Forestry workers	0.20885	-0.0920854	0.512235	0.805116	Employment history	Sociodemographics	22617#9112	Sociodemographics	0.999384	-0.001384	-0.303271	0.292344
Job coding: window fitter, window fabricator, glazier, double glazing installer	-0.22647	-0.552945	0.104042	0.805116	Employment history	Sociodemographics	22601#53162547	Sociodemographics	0.672723	-0.222772	-0.567269	0.11353
Job code - historical: Glaziers, window fabricators and fitters	-0.22647	-0.552945	0.104042	0.805116	Employment history	Sociodemographics	22617#5316	Sociodemographics	0.672723	-0.222772	-0.567269	0.11353
Job coding: hospital porter	0.157909	-0.071037	0.388306	0.805116	Employment history	Sociodemographics	22601#92213091	Sociodemographics	0.949789	0.0533962	-0.234824	0.333201
Nitrogen dioxide air pollution; 2005	-0.00235134	-0.00577948	0.00107681	0.805116	Residential air pollution	Sociodemographics	24016	Sociodemographics	0.942404	-0.000686714	-0.00411308	0.00273965
Job coding: air hostess, air steward, air travel assistant, cabin/flight attendant, cabin crew, air purser, passenger services agent, check-in-staff	0.136436	-0.0620503	0.335966	0.805116	Employment history	Sociodemographics	22601#62143372	Sociodemographics	0.948301	0.0372317	-0.161003	0.23156
Job coding: road transport/traffic clerk, distribution clerk/controller, shipping clerk/controller, fleet controller/administrator, traffic officer (road haulage)	-0.0903255	-0.221822	0.0418076	0.805116	Employment history	Sociodemographics	22601#41342670	Sociodemographics	0.856644	-0.0516541	-0.185963	0.0810503
Job coding: school secretary, clerical assistant, school registry assistant	-0.0503369	-0.123783	0.0232942	0.805116	Employment history	Sociodemographics	22601#42133423	Sociodemographics	0.823517	-0.0346379	-0.109066	0.0392805
Job coding: road transport/traffic manager, haulage contractor/manager, taxi/courier service manager, bus/coach station manager, removals manager, shipping manager	0.0792133	-0.0364683	0.195311	0.805116	Employment history	Sociodemographics	22601#11612669	Sociodemographics	0.91728	0.0304247	-0.085103	0.144627
Job coding: stable manager	0.312654	-0.142066	0.772012	0.805116	Employment history	Sociodemographics	22601#51192519	Sociodemographics	0.935159	0.0946713	-0.361112	0.526214
Nitrogen dioxide air pollution; 2006	-0.00234114	-0.00576786	0.00108558	0.805116	Residential air pollution	Sociodemographics	24017	Sociodemographics	0.969149	-0.0004001	-0.00382504	0.00302484
Job coding: musical instrument maker/repairer	-0.412331	-1.00772	0.198966	0.805116	Employment history	Sociodemographics	22601#54942909	Sociodemographics	0.825043	0.273762	-0.340147	0.838614
Job coding: police officer (inspector or above)	0.0732045	-0.03393	0.180703	0.805116	Employment history	Sociodemographics	22601#11723441	Sociodemographics	0.879837	-0.036689	-0.14477	0.070311
Job code - historical: Police officers (inspectors and above)	0.0732045	-0.03393	0.180703	0.805116	Employment history	Sociodemographics	22617#1172	Sociodemographics	0.879837	-0.036689	-0.14477	0.070311
Job coding: medical secretary	-0.0466268	-0.115004	0.0219063	0.805116	Employment history	Sociodemographics	22601#42113298	Sociodemographics	0.719309	-0.101685	-0.270572	0.0648417
Job coding: vocational or industrial trainer/instructor	-0.12574	-0.310014	0.059895	0.805116	Employment history	Sociodemographics	22601#35633218	Sociodemographics	0.964461	0.0189387	-0.135628	0.171171
Job code - historical: Photographers and audio-visual equipment operators	0.0681692	-0.0321834	0.168831	0.805116	Employment history	Sociodemographics	22617#3434	Sociodemographics	0.161124	0.13113	0.0322975	0.2289
Job code - historical: Librarians	-0.0396993	-0.0982056	0.0189212	0.805116	Employment history	Sociodemographics	22617#2451	Sociodemographics	0.0558711	-0.0934214	-0.152988	-0.0341647
Job coding: non-commissioned officers or other rank of armed forces	0.0313429	-0.0150261	0.0777818	0.805116	Employment history	Sociodemographics	22601#33113434	Sociodemographics	0.942436	0.00913008	-0.037211	0.0552759
Job code - historical: NCOs and other ranks	0.0313429	-0.0150261	0.0777818	0.805116	Employment history	Sociodemographics	22617#3311	Sociodemographics	0.942436	0.00913008	-0.037211	0.0552759
Ever taken oral contraceptive pill	0.00858444	-0.00414349	0.0213099	0.805116	Female-specific factors	Sociodemographics	2784	Sociodemographics	0.209444	0.0159862	0.00324299	0.0287389
Job coding: building or civil engineering technician, structural engineering technician, survey technician	0.121346	-0.0585128	0.302178	0.805116	Employment history	Sociodemographics	22601#31143051	Sociodemographics	0.963162	0.0251999	-0.154362	0.201528
Job code - historical: Building and civil engineering technicians	0.121346	-0.0585128	0.302178	0.805116	Employment history	Sociodemographics	22617#3114	Sociodemographics	0.963162	0.0251999	-0.154362	0.201528
Workplace had a lot of cigarette smoke from other people smoking: Rarely/never	-0.0128399	-0.0319372	0.00624809	0.805116	Employment history	Sociodemographics	22611#0	Sociodemographics	0.392561	-0.019214	-0.0382133	-0.000193243
Workplace had a lot of cigarette smoke from other people smoking	-0.0124089	-0.0308588	0.00604774	0.805116	Employment history	Sociodemographics	22611#2	Sociodemographics	0.804826	0.00898891	-0.00946482	0.027421
Job coding: archivist, curator, conservator, inspector of ancient monuments, museum officer, public records officer	-0.174308	-0.43251	0.0866427	0.805116	Employment history	Sociodemographics	22601#24523315	Sociodemographics	0.930509	0.0593987	-0.203649	0.315536
Job coding: petrol station manager	-0.180687	-0.44864	0.0902268	0.805116	Employment history	Sociodemographics	22601#11633326	Sociodemographics	0.883229	-0.0910114	-0.370238	0.181871
Job coding: crane operator	-0.390111	-0.965972	0.200351	0.805116	Employment history	Sociodemographics	22601#82212533	Sociodemographics	0.964461	-0.0760966	-0.68735	0.505525
Workplace very noisy: Rarely/never	-0.0106161	-0.0265107	0.00527288	0.805116	Employment history	Sociodemographics	22606#0	Sociodemographics	0.513076	-0.013762	-0.0296253	0.0021129
Job coding: speech and language therapist	0.112976	-0.0557615	0.282586	0.805116	Employment history	Sociodemographics	22601#32233080	Sociodemographics	0.981903	-0.0110027	-0.182053	0.157363
Job code - historical: Speech and language therapists	0.112976	-0.0557615	0.282586	0.805116	Employment history	Sociodemographics	22617#3223	Sociodemographics	0.981903	-0.0110027	-0.182053	0.157363
Breathing problems responsible for leaving job: No	0.0193969	-0.00965666	0.048477	0.805116	Employment history	Sociodemographics	22619#0	Sociodemographics	0.857773	-0.0111099	-0.0402267	0.0179333
Usual length of each night shift during night shift periods	-0.0565331	-0.141232	0.028166	0.805116	Employment history	Sociodemographics	22652	Sociodemographics	0.879837	-0.0285081	-0.111671	0.0546545
Job coding: bus conductor	0.129266	-0.0650738	0.32469	0.808415	Employment history	Sociodemographics	22601#62192607	Sociodemographics	0.972658	-0.0203922	-0.215661	0.171174
Job coding: medical doctor, general practitioner, hospital consultant	0.0359351	-0.0183686	0.0903338	0.808415	Employment history	Sociodemographics	22601#22113066	Sociodemographics	0.262754	0.0633565	0.00938012	0.117045
Job code - historical: Medical practitioners	0.0359351	-0.0183686	0.0903338	0.808415	Employment history	Sociodemographics	22617#2211	Sociodemographics	0.262754	0.0633565	0.00938012	0.117045
Natural environment percentage, buffer 300m	0.00225464	-0.00115845	0.00566774	0.808415	Greenspace and coastal proximity	Sociodemographics	24507	Sociodemographics	0.922433	0.000877052	-0.00253622	0.00429032
Job coding: nursing auxiliary or assistant, steriliser of medical equipment, occupational therapy assistant, phlebotomist, physiotherapy assistant, ward orderly, ward assistant	-0.0382603	-0.0961373	0.0197247	0.808415	Employment history	Sociodemographics	22601#61113073	Sociodemographics	0.989851	0.0026988	-0.0555784	0.0606618
Job code - historical: Nursing auxiliaries and assistants	-0.0382603	-0.0961373	0.0197247	0.808415	Employment history	Sociodemographics	22617#6111	Sociodemographics	0.989851	0.0026988	-0.0555784	0.0606618
Job code - historical: Leisure and sports managers	-0.072692	-0.182578	0.0376408	0.808415	Employment history	Sociodemographics	22617#1225	Sociodemographics	0.981033	-0.00885664	-0.120332	0.101451
Job code - historical: Medical secretaries	-0.0420553	-0.1057	0.0217231	0.808415	Employment history	Sociodemographics	22617#4211	Sociodemographics	0.49913	-0.0576248	-0.122134	0.00651467
Health score (Scotland)	-0.00934749	-0.0235663	0.00487127	0.808415	Indices of Multiple Deprivation	Sociodemographics	26430	Sociodemographics	0.850159	0.00574062	-0.00856894	0.0200502
Home location - north co-ordinate (rounded)	-0.00217107	-0.00547879	0.00113665	0.808415	Home locations	Sociodemographics	22704	Sociodemographics	0.931911	0.000723931	-0.00258376	0.00403162
Job coding: packer, wrapper, foreman	0.270466	-0.139239	0.684106	0.808415	Employment history	Sociodemographics	22601#91342734	Sociodemographics	0.963162	-0.0332537	-0.271807	0.200135
Job coding: telephone salesperson, telephone canvasser	-0.158875	-0.400298	0.085049	0.808415	Employment history	Sociodemographics	22601#71133342	Sociodemographics	0.484863	-0.232126	-0.488333	0.0197148
Job code - historical: Telephone salespersons	-0.158875	-0.400298	0.085049	0.808415	Employment history	Sociodemographics	22617#7113	Sociodemographics	0.484863	-0.232126	-0.488333	0.0197148
Job coding: bus or coach driver, minibus driver	-0.262866	-0.662331	0.143266	0.808415	Employment history	Sociodemographics	22601#82133380	Sociodemographics	0.970159	-0.0117363	-0.114802	0.0903327
Transport type for commuting to job workplace: Cycle	-0.0114823	-0.0291083	0.0061521	0.808415	Employment	Sociodemographics	6143#4	Sociodemographics	0.963162	-0.00243952	-0.0201093	0.0152065
Job coding: housekeeper, butler, valet, cook-housekeeper, companion-housekeeper	0.0782734	-0.0417398	0.198736	0.808415	Employment history	Sociodemographics	22601#62312996	Sociodemographics	0.470766	0.109564	-0.00914011	0.226727
Job code - historical: Housekeepers and related occupations	0.0782734	-0.0417398	0.198736	0.808415	Employment history	Sociodemographics	22617#6231	Sociodemographics	0.470766	0.109564	-0.00914011	0.226727
Income score (Scotland)	-0.00925233	-0.023492	0.00498738	0.808415	Indices of Multiple Deprivation	Sociodemographics	26428	Sociodemographics	0.927938	0.00348621	-0.0108446	0.017817
Job coding: customer care/relations manager, help desk manager	0.127963	-0.0683544	0.325448	0.808415	Employment history	Sociodemographics	22601#11423324	Sociodemographics	0.871065	0.0694163	-0.126827	0.261745
Job coding: routine laboratory tester	-0.266191	-0.672771	0.147389	0.808415	Employment history	Sociodemographics	22601#81382827	Sociodemographics	0.981033	-0.0289253	-0.457515	0.382884
Job coding: financial adviser/agent/consultant, investment analyst, mortgage consultant, financier, pension advisor	-0.0455055	-0.115926	0.0250852	0.808415	Employment history	Sociodemographics	22601#35343267	Sociodemographics	0.84854	-0.0288855	-0.100171	0.0419349
Job code - historical: Finance and investment analysts/advisers	-0.0455055	-0.115926	0.0250852	0.808415	Employment history	Sociodemographics	22617#3534	Sociodemographics	0.84854	-0.0288855	-0.100171	0.0419349
Workplace very dusty	0.00927804	-0.00509846	0.0236575	0.808415	Employment history	Sociodemographics	22609#1	Sociodemographics	0.927938	0.00351365	-0.0108617	0.0178834
Crime score (Scotland)	-0.00960395	-0.0244875	0.00527957	0.808415	Indices of Multiple Deprivation	Sociodemographics	26434	Sociodemographics	0.971245	-0.00161934	-0.0165975	0.0133588
Job coding: counter clerk, bank clerk, cashier, post office clerk	-0.023774	-0.0606588	0.0131519	0.808415	Employment history	Sociodemographics	22601#41233254	Sociodemographics	0.666252	-0.0246558	-0.0618215	0.0123869
Job coding: ramp agent, airport hand, aircraft refueller	0.232716	-0.127343	0.59593	0.808415	Employment history	Sociodemographics	22601#82182642	Sociodemographics	0.55174	0.277311	-0.0719666	0.611908
Housing score (Wales)	-0.0105343	-0.0269793	0.00591061	0.808415	Indices of Multiple Deprivation	Sociodemographics	26423	Sociodemographics	0.812287	-0.0079004	-0.0244539	0.00865314
Gas or solid-fuel cooking/heating	0.00573094	-0.00325687	0.0147206	0.808415	Household	Sociodemographics	6139#100	Sociodemographics	0.514135	0.00759418	-0.00138807	0.0165716
How are people in household related to participant: Grandchild	-0.024596	-0.0632287	0.0140838	0.808415	Household	Sociodemographics	6141#6	Sociodemographics	0.954298	0.00681143	-0.0319194	0.0453992
Job coding: social science researcher, anthropologist, sociologist, archaeologist, behavioural scientist, epidemiologist, government survey officer	0.0665441	-0.0378907	0.171327	0.808415	Employment history	Sociodemographics	22601#23223027	Sociodemographics	0.999406	0.00039038	-0.104438	0.104156
Job coding: forge worker, brass stamper, farrier, blacksmith	0.257963	-0.145692	0.665352	0.808415	Employment history	Sociodemographics	22601#52112921	Sociodemographics	0.596957	0.288261	-0.101201	0.659285
Job coding: festival organiser, events coordinator	0.14786	-0.0839763	0.381181	0.808415	Employment history	Sociodemographics	22601#35393175	Sociodemographics	0.95683	0.0377608	-0.195479	0.265522
Job code - historical: Residential and day care managers	0.0645389	-0.0381419	0.167548	0.816925	Employment history	Sociodemographics	22617#1185	Sociodemographics	0.83338	0.0458158	-0.0565978	0.147179
Job coding: weigher, grader, sorter, picker; weighbridge clerk/controller	-0.337565	-0.869239	0.206692	0.816925	Employment history	Sociodemographics	22601#81342840	Sociodemographics	0.986741	-0.0306732	-0.592333	0.501866
Workplace very cold: Rarely/never	0.0116459	-0.00694881	0.0302338	0.816925	Employment history	Sociodemographics	22607#0	Sociodemographics	0.888269	-0.00584194	-0.024416	0.0127548
Cascot confidence score	0.0125654	-0.00753671	0.0326676	0.817784	Employment	Sociodemographics	20121	Sociodemographics	0.95683	0.00330094	-0.0168104	0.0234123
Job coding: veterinary nurse or assistant, animal technician	-0.180993	-0.469263	0.110693	0.817784	Employment history	Sociodemographics	22601#61313125	Sociodemographics	0.793704	0.184273	-0.189633	0.541303
Job code - historical: Seafarers (merchant navy); barge, lighter and boat operatives	-0.141669	-0.368324	0.087064	0.817784	Employment history	Sociodemographics	22617#8217	Sociodemographics	0.883395	-0.0755715	-0.309499	0.153382
Job coding: quarry worker, surface miner (not coal), underground miner (not coal)	0.194558	-0.116768	0.508427	0.817784	Employment history	Sociodemographics	22601#81232851	Sociodemographics	0.975504	0.0305054	-0.281455	0.332363
Job code - historical: Quarry workers and related operatives	0.194558	-0.116768	0.508427	0.817784	Employment history	Sociodemographics	22617#8123	Sociodemographics	0.975504	0.0305054	-0.281455	0.332363
Job coding: draughtsperson, cartographer, designer-detailer/draughtsperson, drawing office checker, engineering draughtsperson	0.0742815	-0.0450919	0.194093	0.817784	Employment history	Sociodemographics	22601#31223293	Sociodemographics	0.436494	0.112657	-0.00474737	0.228523
Job code - historical: Draughtspersons	0.0742815	-0.0450919	0.194093	0.817784	Employment history	Sociodemographics	22617#3122	Sociodemographics	0.436494	0.112657	-0.00474737	0.228523
Job coding: farmer, farming contractor, herd manager, smallholder, bailiff	-0.0915438	-0.238675	0.0564009	0.817784	Employment history	Sociodemographics	22601#51112476	Sociodemographics	0.66334	-0.100664	-0.251747	0.0484877
Job code - historical: Farmers	-0.0915438	-0.238675	0.0564009	0.817784	Employment history	Sociodemographics	22617#5111	Sociodemographics	0.66334	-0.100664	-0.251747	0.0484877
Qualifications: NVQ or HND or HNC or equivalent	-0.00549611	-0.0143742	0.00338331	0.817784	Education	Sociodemographics	6138#5	Sociodemographics	0.902078	-0.00256256	-0.0114479	0.00631817
Job coding: architectural technologist/technician/assistant, town planning technician, planning enforcement officer	0.0987561	-0.0603968	0.25868	0.817784	Employment history	Sociodemographics	22601#31213292	Sociodemographics	0.732234	0.0916454	-0.0659614	0.246567
Job code - historical: Architectural technologists and town planning technicians	0.0987561	-0.0603968	0.25868	0.817784	Employment history	Sociodemographics	22617#3121	Sociodemographics	0.732234	0.0916454	-0.0659614	0.246567
Number of night shifts worked monthly during night shift periods	-0.0266372	-0.069752	0.0164776	0.817784	Employment history	Sociodemographics	22653	Sociodemographics	0.814515	-0.0201832	-0.062737	0.0223705
Private healthcare	-0.00790189	-0.0207006	0.00489684	0.817784	Other sociodemographic factors	Sociodemographics	4674	Sociodemographics	0.997922	9.06263e-05	-0.0127055	0.0128867
Job coding: agricultural machine driver, tractor driver	0.339449	-0.207888	0.893595	0.820896	Employment history	Sociodemographics	22601#82232622	Sociodemographics	0.981033	0.038514	-0.513709	0.559738
Ever had breast cancer screening / mammogram	-0.0107181	-0.0281997	0.00676	0.821735	Female-specific factors	Sociodemographics	2674	Sociodemographics	0.879837	0.00604267	-0.0114273	0.0235173
Job coding: school inspector, education inspector	0.0801873	-0.0505154	0.211435	0.823101	Employment history	Sociodemographics	22601#23133421	Sociodemographics	0.875335	0.0455061	-0.0844658	0.173711
Job code - historical: Brokers	0.0496064	-0.0314681	0.130889	0.823101	Employment history	Sociodemographics	22617#3532	Sociodemographics	0.688123	0.051393	-0.0293947	0.13153
Job code - historical: Weighers, graders, sorters	-0.0957772	-0.252114	0.0614871	0.823101	Employment history	Sociodemographics	22617#8134	Sociodemographics	0.845863	-0.0666063	-0.226757	0.0912979
Transport type for commuting to job workplace: Public transport	-0.0071624	-0.0189165	0.00459432	0.823362	Employment	Sociodemographics	6143#3	Sociodemographics	0.617889	-0.00854755	-0.0203206	0.00321738
Job coding: mechanical engineer	-0.121365	-0.32002	0.0787783	0.823362	Employment history	Sociodemographics	22601#21222865	Sociodemographics	0.971245	0.0117018	-0.0967266	0.118975
Workplace full of chemical or other fumes	-0.00989879	-0.0261653	0.00637096	0.823362	Employment history	Sociodemographics	22610#1	Sociodemographics	0.906029	-0.00454902	-0.0208298	0.0117187
Job coding: flying instructor	0.284923	-0.180981	0.754754	0.823362	Employment history	Sociodemographics	22601#35122637	Sociodemographics	0.993648	0.00804742	-0.462052	0.456516
Job coding: company secretary, club secretary	0.0941141	-0.060432	0.249383	0.823362	Employment history	Sociodemographics	22601#42143301	Sociodemographics	0.835144	-0.0697913	-0.226651	0.0848712
Job code - historical: Company secretaries	0.0941141	-0.060432	0.249383	0.823362	Employment history	Sociodemographics	22617#4214	Sociodemographics	0.835144	-0.0697913	-0.226651	0.0848712
Job coding: metal working machine operator, fettler, grinder, metal cutter, metal machinist, metal polisher, press operator, shot blaster, tool room machinist	0.109489	-0.0703594	0.290283	0.823362	Employment history	Sociodemographics	22601#81252835	Sociodemographics	0.879837	0.0608251	-0.118134	0.236439
Job code - historical: Metal working machine operatives	0.109489	-0.0703594	0.290283	0.823362	Employment history	Sociodemographics	22617#8125	Sociodemographics	0.879837	0.0608251	-0.118134	0.236439
Job coding: plasterer	0.194154	-0.125003	0.515294	0.823362	Employment history	Sociodemographics	22601#53212552	Sociodemographics	0.423898	0.297563	-0.0118042	0.595828
Job code - historical: Plasterers	0.194154	-0.125003	0.515294	0.823362	Employment history	Sociodemographics	22617#5321	Sociodemographics	0.423898	0.297563	-0.0118042	0.595828
Job coding: veterinary nurse or assistant, animal technician	0.230848	-0.148251	0.613334	0.823475	Employment history	Sociodemographics	22601#61312483	Sociodemographics	0.793704	0.184273	-0.189633	0.541303
Job coding: bookmaker	0.249458	-0.162091	0.665525	0.829392	Employment history	Sociodemographics	22601#62113194	Sociodemographics	0.810036	0.189754	-0.215204	0.575925
Job coding: research or laboratory manager	-0.0363558	-0.0967897	0.0241986	0.830505	Employment history	Sociodemographics	22601#11373019	Sociodemographics	0.772659	-0.0318792	-0.0928457	0.028744
Job code - historical: Higher education teaching professionals	0.0230003	-0.0153547	0.0614036	0.833398	Employment history	Sociodemographics	22617#2311	Sociodemographics	0.470766	0.035367	-0.00280052	0.0733985
Job coding: fire service officer (leading fire officer and below)	-0.0876677	-0.234117	0.0595791	0.835369	Employment history	Sociodemographics	22601#33133440	Sociodemographics	0.927938	-0.0367424	-0.18637	0.110892
Job code - historical: Fire service officers (leading fire officer and below)	-0.0876677	-0.234117	0.0595791	0.835369	Employment history	Sociodemographics	22617#3313	Sociodemographics	0.927938	-0.0367424	-0.18637	0.110892
Job code - historical: Rail travel assistants	-0.122375	-0.326688	0.0835501	0.835369	Employment history	Sociodemographics	22617#6215	Sociodemographics	0.931911	-0.0458739	-0.255823	0.160087
Job coding: arts officer, producer, director; entertainment/artists'/theatrical agent; studio manager, prompter	-0.0767924	-0.205478	0.0524904	0.835369	Employment history	Sociodemographics	22601#34163176	Sociodemographics	0.969149	-0.0150797	-0.146004	0.114251
Job code - historical: Arts officers, producers and directors	-0.0767924	-0.205478	0.0524904	0.835369	Employment history	Sociodemographics	22617#3416	Sociodemographics	0.969149	-0.0150797	-0.146004	0.114251
Breathing problems during period of job: Yes	0.015631	-0.0107074	0.0419907	0.8371	Employment history	Sociodemographics	22616#1	Sociodemographics	0.955725	-0.00444388	-0.0308376	0.0218915
Job coding: hairdressing or beauty salon manager or proprietor/owner	0.0760632	-0.052197	0.204841	0.83724	Employment history	Sociodemographics	22601#12333358	Sociodemographics	0.489095	0.114236	-0.0125849	0.23934
Job code - historical: Hairdressing and beauty salon managers and proprietors	0.0760632	-0.052197	0.204841	0.83724	Employment history	Sociodemographics	22617#1233	Sociodemographics	0.489095	0.114236	-0.0125849	0.23934
Job coding: building site foreman or supervisor	0.374894	-0.255427	1.01089	0.83724	Employment history	Sociodemographics	22601#81492560	Sociodemographics	0.95683	-0.0319914	-0.231735	0.163997
Job coding: other work in this industry: factory hand, mate, assistant, handler, loader	-0.132331	-0.355369	0.092543	0.83724	Employment history	Sociodemographics	22601#91392845	Sociodemographics	0.993648	-0.00568731	-0.329507	0.308405
Job coding: other sports and fitness jobs including riding school instructor, balloonist, outdoor pursuits instructor	-0.162013	-0.434747	0.113848	0.83724	Employment history	Sociodemographics	22601#34493143	Sociodemographics	0.858999	-0.106415	-0.391496	0.172319
Job code - historical: Sports and fitness occupations n.e.c.	-0.162013	-0.434747	0.113848	0.83724	Employment history	Sociodemographics	22617#3449	Sociodemographics	0.858999	-0.106415	-0.391496	0.172319
Job coding: picture frame maker	0.285658	-0.194197	0.77263	0.83724	Employment history	Sociodemographics	22601#54922906	Sociodemographics	0.804826	0.224733	-0.249452	0.671035
Job coding: wireman, coil winder, wirer	-0.127862	-0.344598	0.0907036	0.83724	Employment history	Sociodemographics	22601#81312795	Sociodemographics	0.506758	-0.20016	-0.426666	0.0225597
Job coding: design and development engineer	0.188716	-0.1312	0.511264	0.83724	Employment history	Sociodemographics	22601#21262683	Sociodemographics	0.835401	-0.14166	-0.471623	0.179717
Job coding: machine operator, plastics moulder, foreman	-0.0852497	-0.2303	0.0606043	0.83724	Employment history	Sociodemographics	22601#81162743	Sociodemographics	0.976686	0.0139079	-0.133195	0.158915
Job code - historical: Plastics process operatives	-0.0852497	-0.2303	0.0606043	0.83724	Employment history	Sociodemographics	22617#8116	Sociodemographics	0.976686	0.0139079	-0.133195	0.158915
Job coding: broker, financial/insurance broker, foreign exchange dealer, ship/marine broker, stockbroker, commodity trader	0.0557234	-0.0395011	0.151231	0.83724	Employment history	Sociodemographics	22601#35323258	Sociodemographics	0.928784	0.0331267	-0.108213	0.172456
Job coding: auto electrician	0.350505	-0.247608	0.953712	0.840339	Employment history	Sociodemographics	22601#52332662	Sociodemographics	0.906991	0.0851763	-0.225434	0.385808
Job coding: geographer, historian, philosopher, linguist, political scientist	-0.162921	-0.442119	0.119272	0.841878	Employment history	Sociodemographics	22601#23223028	Sociodemographics	0.922614	-0.0729389	-0.362471	0.209438
Inverse distance to the nearest major road	0.00198886	-0.00143936	0.00541708	0.841878	Residential air pollution	Sociodemographics	24012	Sociodemographics	0.859696	0.00128672	-0.00213973	0.00471316
Job coding: railway shop mechanic, fitter or stripper, wheeler	0.145838	-0.106121	0.399582	0.844944	Employment history	Sociodemographics	22601#52232634	Sociodemographics	0.648066	-0.178991	-0.438889	0.0759822
Current employment status	-0.0288941	-0.0789935	0.0212869	0.844944	Employment	Sociodemographics	6142#100	Sociodemographics	0.931911	-0.0109389	-0.0613387	0.0392203
Job coding: funeral parlour manager, crematorium or cemetery manager	0.305519	-0.222409	0.839881	0.847487	Employment history	Sociodemographics	22601#12393117	Sociodemographics	0.845863	0.211339	-0.312106	0.70238
Job code - historical: Undertakers and mortuary assistants	0.164725	-0.122148	0.453808	0.848413	Employment history	Sociodemographics	22617#6291	Sociodemographics	0.764777	0.151125	-0.132425	0.42569
Consecutive night shifts during night shift periods	0.0502056	-0.0376077	0.138019	0.848413	Employment history	Sociodemographics	22654	Sociodemographics	0.953606	-0.0154025	-0.101543	0.070738
Job coding: judge's or barrister's clerk, conveyancer, data protection officer, legal assistant or executive, coroner's officer, land registrar, tribunal member	0.0972672	-0.0726023	0.26802	0.848413	Employment history	Sociodemographics	22601#35203279	Sociodemographics	0.930509	0.0380427	-0.132305	0.205501
Job code - historical: Legal associate professionals	0.0972672	-0.0726023	0.26802	0.848413	Employment history	Sociodemographics	22617#3520	Sociodemographics	0.930509	0.0380427	-0.132305	0.205501
Job code - historical: Library assistants/clerks	-0.0422056	-0.116202	0.0319795	0.848413	Employment history	Sociodemographics	22617#4135	Sociodemographics	0.12977	-0.104361	-0.17995	-0.0292589
Job code - historical: Design and development engineers	-0.048117	-0.13252	0.0365203	0.848413	Employment history	Sociodemographics	22617#2126	Sociodemographics	0.33307	-0.0926599	-0.178503	-0.00746344
Job coding: rail transport/traffic manager, haulage contractor/manager, shipping manager, railway station manager	0.138494	-0.104429	0.382973	0.848413	Employment history	Sociodemographics	22601#11612671	Sociodemographics	0.835144	0.103965	-0.136332	0.337923
Heating type(s) in home: Gas central heating	0.0122539	-0.0093312	0.033827	0.848413	Household	Sociodemographics	6140#1	Sociodemographics	0.892783	-0.00649403	-0.0280544	0.0151027
Job involves shift work	-0.00704179	-0.0194551	0.00537149	0.848413	Employment	Sociodemographics	826	Sociodemographics	0.981903	0.000816606	-0.0115993	0.0132326
Years since last breast cancer screening / mammogram	0.00690634	-0.00540035	0.019213	0.857978	Female-specific factors	Sociodemographics	2684	Sociodemographics	0.79752	-0.0061112	-0.0183894	0.00616696
Nitrogen dioxide air pollution; 2007	-0.00192043	-0.00534886	0.00150799	0.858105	Residential air pollution	Sociodemographics	24018	Sociodemographics	0.962358	-0.000496698	-0.00392334	0.00292995
Job coding: other animal care worker including dog beautician, dog walker, dog warden; kennel or cattery assistant; groom, huntsman, stable worker; zoo keeper	0.308683	-0.239876	0.862077	0.858105	Employment history	Sociodemographics	22601#61393126	Sociodemographics	0.513076	0.439228	-0.0834802	0.927852
Job coding: routine inspector, tester	-0.312553	-0.865001	0.252488	0.858105	Employment history	Sociodemographics	22601#81332755	Sociodemographics	0.993648	-0.00484402	-0.266026	0.249885
Job code - historical: Planning and quality control engineers	0.063628	-0.0502915	0.17796	0.858105	Employment history	Sociodemographics	22617#2128	Sociodemographics	0.997744	0.000905435	-0.113342	0.113884
Job coding: other animal care work including dog beautician, dog walker, dog warden; kennel or cattery assistant; groom, huntsman, stable worker; zoo keeper	-0.0910967	-0.254034	0.0728176	0.858105	Employment history	Sociodemographics	22601#61392517	Sociodemographics	0.795346	-0.0835623	-0.251703	0.0821966
Job coding: other travel assistants, other travel hostess/steward	0.170172	-0.133907	0.476759	0.858105	Employment history	Sociodemographics	22601#62193379	Sociodemographics	0.850159	0.118498	-0.184318	0.411325
Job coding: builder, building contractor	0.189243	-0.149093	0.530979	0.858105	Employment history	Sociodemographics	22601#53192561	Sociodemographics	0.95683	-0.0549991	-0.399213	0.279287
Job code - historical: Public relations officers	-0.0504377	-0.141035	0.0404456	0.858105	Employment history	Sociodemographics	22617#3433	Sociodemographics	0.939176	0.0187313	-0.0725008	0.109144
Job coding: computer engineer, computer service or maintenance technician	-0.102322	-0.28609	0.0827505	0.858105	Employment history	Sociodemographics	22601#52452948	Sociodemographics	0.881336	-0.0625433	-0.251299	0.123052
Home location at assessment - north co-ordinate (rounded)	-0.00183304	-0.0051556	0.00148953	0.858105	Reception	Sociodemographics	20075	Sociodemographics	0.878523	0.00116006	-0.00216267	0.00448279
Worked with materials containing asbestos	-0.0135456	-0.038096	0.0110166	0.858105	Employment history	Sociodemographics	22612#1	Sociodemographics	0.9753	0.00591538	-0.0526468	0.064151
Job coding: scaffolder, rigger	-0.201277	-0.563163	0.166606	0.858105	Employment history	Sociodemographics	22601#81412565	Sociodemographics	0.561611	-0.307181	-0.695434	0.0724484
Job code - historical: Security guards and related occupations	0.0674735	-0.0552695	0.190686	0.859076	Employment history	Sociodemographics	22617#9241	Sociodemographics	0.961543	-0.0180912	-0.141891	0.104316
Income score (Wales)	-0.00901345	-0.0254602	0.0074333	0.859202	Indices of Multiple Deprivation	Sociodemographics	26418	Sociodemographics	0.787297	-0.00843696	-0.024992	0.00811808
Job coding: storesman, warehouseman, porter	0.151459	-0.123994	0.42911	0.859337	Employment history	Sociodemographics	22601#91492799	Sociodemographics	0.995302	-0.00517748	-0.412161	0.38687
Nitrogen oxides air pollution; 2010	-0.00186572	-0.00527662	0.00154518	0.859337	Residential air pollution	Sociodemographics	24004	Sociodemographics	0.932414	0.000737427	-0.0026717	0.00414656
Job coding: prosthetic limb maker or adapter	-0.263817	-0.742593	0.225353	0.859935	Employment history	Sociodemographics	22601#54992962	Sociodemographics	0.835144	-0.227461	-0.74312	0.269632
Job coding: dinner lady	-0.0848615	-0.240272	0.0714359	0.859935	Employment history	Sociodemographics	22601#92233412	Sociodemographics	0.963162	-0.021726	-0.179888	0.134083
Work hours - lumped category	0.0101795	-0.00853637	0.0289033	0.859935	Employment history	Sociodemographics	22604#2	Sociodemographics	0.95683	0.00222916	-0.0116273	0.0160883
Job code - historical: Mobile machine drivers and operatives n.e.c.	-0.110479	-0.313138	0.0937	0.859935	Employment history	Sociodemographics	22617#8229	Sociodemographics	0.856942	0.0777842	-0.125758	0.276938
Job coding: restaurant or catering manager, restaurateur; canteen manager; takeaway food shop manager	0.046665	-0.0391777	0.132738	0.859935	Employment history	Sociodemographics	22601#12233383	Sociodemographics	0.79752	0.0424797	-0.0433717	0.127607
Job code - historical: Restaurant and catering managers	0.046665	-0.0391777	0.132738	0.859935	Employment history	Sociodemographics	22617#1223	Sociodemographics	0.79752	0.0424797	-0.0433717	0.127607
Job coding: dentist, dental surgeon, orthodontist, periodontist	0.0664387	-0.0562917	0.189641	0.86033	Employment history	Sociodemographics	22601#22153070	Sociodemographics	0.993648	0.0023752	-0.120965	0.124244
Job code - historical: Dental practitioners	0.0664387	-0.0562917	0.189641	0.86033	Employment history	Sociodemographics	22617#2215	Sociodemographics	0.993648	0.0023752	-0.120965	0.124244
Job coding: air transport/traffic clerk, distribution clerk/controller, shipping clerk/controller, aircraft load controller/clerk, traffic officer (airlines)	-0.204573	-0.580329	0.17721	0.86033	Employment history	Sociodemographics	22601#41342674	Sociodemographics	0.874808	-0.138538	-0.535925	0.24631
Job code - historical: Hospital porters	0.096923	-0.0823008	0.277131	0.86033	Employment history	Sociodemographics	22617#9221	Sociodemographics	0.0617443	0.264909	0.0920339	0.43402
Job coding: electrical/electronics technician	-0.057525	-0.164214	0.0495684	0.86033	Employment history	Sociodemographics	22601#31122951	Sociodemographics	0.856942	-0.126698	-0.458757	0.19648
Job coding: welder	-0.20146	-0.573647	0.17534	0.86033	Employment history	Sociodemographics	22601#52152541	Sociodemographics	0.963162	0.0493866	-0.318507	0.403811
Job coding: forestry manager	0.20875	-0.178055	0.599506	0.86033	Employment history	Sociodemographics	22601#12192492	Sociodemographics	0.857773	0.143734	-0.239421	0.509888
Age at bilateral oophorectomy (both ovaries removed)	0.0081022	-0.00702401	0.0232284	0.860361	Female-specific factors	Sociodemographics	3882	Sociodemographics	0.663473	0.0101451	-0.00500022	0.0252905
Job coding: other work in this industry: factory hand, mate, assistant, handler, loader	0.124542	-0.107266	0.357943	0.860361	Employment history	Sociodemographics	22601#91392802	Sociodemographics	0.993648	-0.00568731	-0.329507	0.308405
Job coding: storesman, warehouseman, porter	-0.163188	-0.466662	0.144225	0.860599	Employment history	Sociodemographics	22601#91492810	Sociodemographics	0.995302	-0.00517748	-0.412161	0.38687
Qualifications: A levels/AS levels or equivalent	-0.00414192	-0.0118976	0.00361451	0.860599	Education	Sociodemographics	6138#2	Sociodemographics	0.133754	-0.0106921	-0.0184562	-0.00293075
Job coding: care assistant, home care assistant, residential social worker, home carer, nursing home assistant	-0.0311955	-0.0898328	0.0275532	0.863057	Employment history	Sociodemographics	22601#61153104	Sociodemographics	0.883395	0.0191313	-0.0398791	0.077814
Job code - historical: Care assistants and home carers	-0.0311955	-0.0898328	0.0275532	0.863057	Employment history	Sociodemographics	22617#6115	Sociodemographics	0.883395	0.0191313	-0.0398791	0.077814
Job coding: careers adviser or vocational guidance specialist, placement advisor	0.305522	-0.265297	0.88264	0.863057	Employment history	Sociodemographics	22601#35643234	Sociodemographics	0.986741	-0.0188074	-0.36601	0.317523
Job code - historical: Painters and decorators	0.0577748	-0.0509647	0.166884	0.863057	Employment history	Sociodemographics	22617#5323	Sociodemographics	0.858999	0.0407885	-0.067826	0.14825
Job coding: call centre operator, sales order clerk, telephone adviser	0.156034	-0.136928	0.45132	0.863057	Employment history	Sociodemographics	22601#72113341	Sociodemographics	0.946753	-0.0151483	-0.0937693	0.0628994
Job coding: other work handling or storing goods including: store keeper, warehouseman, order assembler, goods despatcher	0.0442949	-0.0391684	0.127982	0.863057	Employment history	Sociodemographics	22601#91493355	Sociodemographics	0.963162	0.0117921	-0.071917	0.0948329
Job code - historical: Metal plate workers, shipwrights, riveters	0.0690603	-0.0611785	0.199851	0.863057	Employment history	Sociodemographics	22617#5214	Sociodemographics	0.942436	0.0258724	-0.104439	0.154499
Job coding: other legal professional including: court clerk, legal officer/advisor, clerk to the justices, legal services registrar	-0.082245	-0.237582	0.0739667	0.863057	Employment history	Sociodemographics	22601#24193278	Sociodemographics	0.947981	0.0296267	-0.127393	0.184201
Job code - historical: Legal professionals n.e.c.	-0.082245	-0.237582	0.0739667	0.863057	Employment history	Sociodemographics	22617#2419	Sociodemographics	0.947981	0.0296267	-0.127393	0.184201
Job coding: routine laboratory tester	0.206263	-0.182977	0.599743	0.863057	Employment history	Sociodemographics	22601#81382716	Sociodemographics	0.981033	-0.0289253	-0.457515	0.382884
Job coding: customer care adviser/officer/assistant, store guide, customer relations officer/representative	0.0490631	-0.044226	0.142633	0.863057	Employment history	Sociodemographics	22601#72123325	Sociodemographics	0.981903	0.00384075	-0.0550131	0.0623724
Job coding: officer of ngo, trade union organiser/official, charity administrator, secretary of research or charity or political or professional or trade association or trade union	0.0274764	-0.0249547	0.0799986	0.863057	Employment history	Sociodemographics	22601#41143216	Sociodemographics	0.905069	-0.0148178	-0.0675442	0.0376533
Job code - historical: Officers of non-governmental organisations	0.0274764	-0.0249547	0.0799986	0.863057	Employment history	Sociodemographics	22617#4114	Sociodemographics	0.905069	-0.0148178	-0.0675442	0.0376533
Job code - historical: Floorers and wall tilers	0.158932	-0.14325	0.463611	0.863057	Employment history	Sociodemographics	22617#5322	Sociodemographics	0.964461	0.0386737	-0.266048	0.334572
Job coding: it strategy or planning professional, computer consultant, software consultant	-0.025537	-0.0743789	0.0233786	0.863057	Employment history	Sociodemographics	22601#21313058	Sociodemographics	0.439348	-0.0473461	-0.0967687	0.00186202
Job code - historical: IT strategy and planning professionals	-0.025537	-0.0743789	0.0233786	0.863057	Employment history	Sociodemographics	22617#2131	Sociodemographics	0.439348	-0.0473461	-0.0967687	0.00186202
Job coding: registrar or senior administrator of educational establishment, bursar, registrar, university administrator	-0.0281331	-0.0819409	0.0257711	0.863057	Employment history	Sociodemographics	22601#23173422	Sociodemographics	0.436494	-0.0524264	-0.106939	0.00181848
Job code - historical: Registrars and senior administrators of educational establishments	-0.0281331	-0.0819409	0.0257711	0.863057	Employment history	Sociodemographics	22617#2317	Sociodemographics	0.436494	-0.0524264	-0.106939	0.00181848
Night shifts worked: Shift pattern was worked for whole of job	-0.0300265	-0.0875502	0.0276073	0.863057	Employment history	Sociodemographics	22650#1	Sociodemographics	0.993648	-0.0011663	-0.0590426	0.0563935
Gas or solid-fuel cooking/heating: A gas hob or gas cooker	-0.00386864	-0.0113352	0.00359708	0.866154	Household	Sociodemographics	6139#1	Sociodemographics	0.662262	-0.00502353	-0.0124852	0.0024401
Job coding: personnel or industrial relations officer, recruitment consultant	-0.0453249	-0.132748	0.0423573	0.866154	Employment history	Sociodemographics	22601#35623246	Sociodemographics	0.981033	0.0151538	-0.182485	0.209
Job coding: school crossing patrol attendant, lollipop man/woman	-0.266354	-0.777828	0.254534	0.868273	Employment history	Sociodemographics	22601#92433414	Sociodemographics	0.92881	0.120475	-0.406832	0.619313
Job code - historical: School crossing patrol attendants	-0.266354	-0.777828	0.254534	0.868273	Employment history	Sociodemographics	22617#9243	Sociodemographics	0.92881	0.120475	-0.406832	0.619313
Relative age voice broke	-0.00884268	-0.0260431	0.00835771	0.868917	Male-specific factors	Sociodemographics	2385	Sociodemographics	0.993398	-0.00048808	-0.0176687	0.0166926
Job coding: heating engineer, gas service engineer, air conditioning engineer	0.0696011	-0.0656067	0.205387	0.868917	Employment history	Sociodemographics	22601#53142540	Sociodemographics	0.9753	-0.0137626	-0.149468	0.120175
Job coding: merchant seaman, seafarer, deckhand, boatman	-0.123129	-0.361725	0.117732	0.868917	Employment history	Sociodemographics	22601#82172651	Sociodemographics	0.981033	-0.0165045	-0.260642	0.221785
Job code - historical: Pipe fitters	0.0716633	-0.0675805	0.211514	0.868917	Employment history	Sociodemographics	22617#5216	Sociodemographics	0.957816	-0.0222195	-0.162333	0.11602
Job coding: planning and quality control engineer, industrial engineer, quality engineer	0.0617778	-0.0584594	0.182477	0.868917	Employment history	Sociodemographics	22601#21283046	Sociodemographics	0.971334	0.012919	-0.1075	0.131906
Close to major road	0.00695108	-0.00666189	0.0205694	0.870416	Residential air pollution	Sociodemographics	24014	Sociodemographics	0.699235	0.00849864	-0.00509923	0.0220811
Job coding: vocational or industrial trainer/instructor	-0.16466	-0.485102	0.160132	0.870416	Employment history	Sociodemographics	22601#35633233	Sociodemographics	0.964461	0.0189387	-0.135628	0.171171
Job coding: air travel assistant, cabin/flight attendant, air hostess, air purser, air steward, cabin crew; passenger services agent; check-in staff	0.0705927	-0.0679662	0.209751	0.871299	Employment history	Sociodemographics	22601#62142638	Sociodemographics	0.825043	0.0635038	-0.0743875	0.199418
Job coding: other researchers including in broadcasting, journalism, photography, printing and publishing	0.0821947	-0.0791337	0.244304	0.871299	Employment history	Sociodemographics	22601#23293031	Sociodemographics	0.981033	0.0115361	-0.150601	0.171133
Job coding: architect, landscape architect/designer, structural designer	0.0503187	-0.0487192	0.149675	0.871299	Employment history	Sociodemographics	22601#24313288	Sociodemographics	0.776227	-0.0572152	-0.167342	0.0518078
Job coding: senior officer in fire service including captain, commander, controller, firemaster, inspector, salvage officer, station officer, superintendent	0.0865718	-0.0838537	0.257892	0.871575	Employment history	Sociodemographics	22601#11733439	Sociodemographics	0.963854	-0.0223984	-0.194569	0.147074
Job coding: plant and machine operative such as pumpsman, duct erector, oilman, etc	0.174721	-0.168532	0.521427	0.871575	Employment history	Sociodemographics	22601#81292858	Sociodemographics	0.955494	-0.0602817	-0.411031	0.27998
Nitrogen dioxide air pollution; 2010	-0.00172669	-0.00513933	0.00168595	0.871575	Residential air pollution	Sociodemographics	24003	Sociodemographics	0.885666	0.00109183	-0.00231904	0.00450271
Job coding: manager of theatre, cinema, museum	-0.0732451	-0.217969	0.0722592	0.87359	Employment history	Sociodemographics	22601#12253173	Sociodemographics	0.981033	0.0100377	-0.136785	0.154795
Job coding: holiday camp worker/entertainer/redcoat	-0.172822	-0.513107	0.172314	0.87359	Employment history	Sociodemographics	22601#92263393	Sociodemographics	0.850159	0.13577	-0.21021	0.468454
Job code - historical: Electricians, electrical fitters	-0.0316335	-0.0944617	0.0313201	0.87359	Employment history	Sociodemographics	22617#5241	Sociodemographics	0.35386	-0.0669131	-0.130509	-0.00368043
Job coding: brewer or distiller	-0.162766	-0.484479	0.162788	0.87359	Employment history	Sociodemographics	22601#21292897	Sociodemographics	0.959913	-0.0510845	-0.382975	0.271293
Job coding: carpenter, carpenter and joiner, builder's joiner	-0.0505831	-0.151044	0.050232	0.87359	Employment history	Sociodemographics	22601#53152546	Sociodemographics	0.961543	0.0222005	-0.125704	0.167965
Job code - historical: Retail cashiers and check-out operators	0.0339702	-0.0335863	0.101675	0.87359	Employment history	Sociodemographics	22617#7112	Sociodemographics	0.993648	-0.00120063	-0.0691129	0.0662822
Job coding: other teaching professional including private tutor, tefl (teaching english as a foreign language) teacher; tutor at adult education centre, etc.	0.0277376	-0.0274398	0.0830132	0.87359	Employment history	Sociodemographics	22601#23193405	Sociodemographics	0.316075	0.0606244	0.00575307	0.1152
Year gap ended	-0.00447493	-0.0133965	0.0044466	0.873875	Employment history	Sociodemographics	22664	Sociodemographics	0.999406	-3.47353e-05	-0.00891494	0.00884547
Heating type(s) in home: Open fire without central heating	-0.0471364	-0.141326	0.0473656	0.874555	Household	Sociodemographics	6140#6	Sociodemographics	0.920929	-0.0247186	-0.120062	0.0698164
Job coding: vocational or industrial trainer/instructor	-0.132241	-0.395499	0.133829	0.874555	Employment history	Sociodemographics	22601#35633285	Sociodemographics	0.964461	0.0189387	-0.135628	0.171171
Job coding: management information officer, conference/events co-ordinator/organiser, exhibition officer, work study engineer/officer/analyst, contract adviser/agent, election agent, business system analyst	-0.0237318	-0.0712966	0.0239062	0.874555	Employment history	Sociodemographics	22601#35393271	Sociodemographics	0.720281	-0.0285909	-0.0765887	0.0191989
Job coding: machine operator, processor, foreman	0.0797349	-0.0798583	0.240125	0.874555	Employment history	Sociodemographics	22601#81212774	Sociodemographics	0.985844	0.00782206	-0.128228	0.142112
Job code - historical: Paper and wood machine operatives	0.0797349	-0.0798583	0.240125	0.874555	Employment history	Sociodemographics	22617#8121	Sociodemographics	0.675811	0.102532	-0.0563008	0.258694
Job coding: vocational trainer/instructor, craft instructor, apprentice instructor	-0.160805	-0.482678	0.165502	0.874803	Employment history	Sociodemographics	22601#35632596	Sociodemographics	0.956302	-0.0547316	-0.388783	0.269175
Job coding: routine examiner, tester	-0.205647	-0.617387	0.212452	0.874803	Employment history	Sociodemographics	22601#81332873	Sociodemographics	0.506758	-0.387643	-0.828029	0.0422839
Job code - historical: Insurance underwriters	-0.0450506	-0.135904	0.0460916	0.874803	Employment history	Sociodemographics	22617#3533	Sociodemographics	0.929111	-0.0212617	-0.113146	0.0698298
Job code - historical: Bus and coach drivers	-0.0485849	-0.146561	0.0497218	0.874803	Employment history	Sociodemographics	22617#8213	Sociodemographics	0.964461	-0.012211	-0.111222	0.0858806
Number of stillbirths	0.015805	-0.0161487	0.0477588	0.874803	Female-specific factors	Sociodemographics	3829	Sociodemographics	0.617889	-0.0233264	-0.0553033	0.00865051
Job coding: packer, wrapper, foreman	-0.115381	-0.347527	0.118981	0.874803	Employment history	Sociodemographics	22601#91342714	Sociodemographics	0.963162	-0.0332537	-0.271807	0.200135
Job coding: railway controller	-0.124903	-0.377747	0.130373	0.874803	Employment history	Sociodemographics	22601#82162627	Sociodemographics	0.508287	-0.232005	-0.497449	0.0283012
Job code - historical: Filing and other records assistants/clerks	-0.0254629	-0.0772607	0.026423	0.874803	Employment history	Sociodemographics	22617#4131	Sociodemographics	0.856009	-0.0202219	-0.0724217	0.0317273
Job code - historical: Metal working production and maintenance fitters	0.029519	-0.0305843	0.0897412	0.874803	Employment history	Sociodemographics	22617#5223	Sociodemographics	0.848684	-0.0244086	-0.0847059	0.0355512
Job coding: personnel, human resources, training or industrial relations manager/director, recruitment manager/director	0.0299962	-0.0311198	0.0912337	0.874803	Employment history	Sociodemographics	22601#11353225	Sociodemographics	0.766917	0.032341	-0.0287276	0.0930472
Job code - historical: Personnel, training and industrial relations managers	0.0299962	-0.0311198	0.0912337	0.874803	Employment history	Sociodemographics	22617#1135	Sociodemographics	0.766917	0.032341	-0.0287276	0.0930472
Job coding: cleaner in restaurants, bars, pubs, hotels and other accommodation; chambermaid	-0.0856832	-0.259928	0.0895973	0.874803	Employment history	Sociodemographics	22601#92333396	Sociodemographics	0.941361	-0.0355862	-0.213722	0.139728
Job coding: traffic warden, wheel clamper	0.248526	-0.257391	0.759749	0.878956	Employment history	Sociodemographics	22601#92423456	Sociodemographics	0.984157	0.0372042	-0.597959	0.634963
Job coding: leisure/sports centre manager	-0.282409	-0.855145	0.30498	0.880653	Employment history	Sociodemographics	22601#12253227	Sociodemographics	0.665687	-0.413792	-1.04254	0.195595
Job code - historical: Welding trades	-0.0622549	-0.190198	0.0662655	0.880653	Employment history	Sociodemographics	22617#5215	Sociodemographics	0.650901	-0.0894421	-0.220221	0.0398733
Job coding: quantity surveyor, quantity survey technician	0.0549339	-0.0581279	0.168393	0.880653	Employment history	Sociodemographics	22601#24332598	Sociodemographics	0.979491	-0.0099355	-0.123473	0.102387
Job coding: upholsterer, coach trimmer, curtain maker, mattress maker	0.0942046	-0.10028	0.289867	0.880891	Employment history	Sociodemographics	22601#54122878	Sociodemographics	0.942436	0.0382498	-0.156838	0.229502
Job code - historical: Upholsterers	0.0942046	-0.10028	0.289867	0.880891	Employment history	Sociodemographics	22617#5412	Sociodemographics	0.942436	0.0382498	-0.156838	0.229502
Job coding: software professional, analyst-programmer, computer programmer, software analyst or engineer, systems designer or programmer	0.0170757	-0.018325	0.0525158	0.880891	Employment history	Sociodemographics	22601#21323059	Sociodemographics	0.835144	-0.0155721	-0.0511508	0.0198968
Job code - historical: Software professionals	0.0170757	-0.018325	0.0525158	0.880891	Employment history	Sociodemographics	22617#2132	Sociodemographics	0.835144	-0.0155721	-0.0511508	0.0198968
Job coding: travel agent, travel agency/booking/reservations clerk, tour organiser	0.0513506	-0.0550062	0.158073	0.880891	Employment history	Sociodemographics	22601#62123369	Sociodemographics	0.764777	0.0568932	-0.0493104	0.16196
Job code - historical: Travel agents	0.0513506	-0.0550062	0.158073	0.880891	Employment history	Sociodemographics	22617#6212	Sociodemographics	0.764777	0.0568932	-0.0493104	0.16196
Job coding: electrical/electronics technician	-0.227419	-0.695112	0.248617	0.880891	Employment history	Sociodemographics	22601#31122867	Sociodemographics	0.856942	-0.126698	-0.458757	0.19648
Job coding: sports centre manager, riding school owner, sports ground manager, baths manager	-0.0919478	-0.282352	0.0998714	0.882125	Employment history	Sociodemographics	22601#12253140	Sociodemographics	0.97024	-0.0217963	-0.216495	0.169401
Job coding: other cleaner including in offices, hospitals, schools, shops, warehouses, ships, aircraft, stations	-0.052533	-0.161618	0.0569777	0.882629	Employment history	Sociodemographics	22601#92332986	Sociodemographics	0.436806	-0.107295	-0.219209	0.00357727
Job code - historical: Architects	0.0357025	-0.0387326	0.110318	0.883443	Employment history	Sociodemographics	22617#2431	Sociodemographics	0.879837	0.0253638	-0.0488953	0.0990818
Job coding: monumental mason, engraver	-0.291088	-0.891744	0.325812	0.883443	Employment history	Sociodemographics	22601#53122901	Sociodemographics	0.764709	-0.352622	-1.01164	0.281357
Job coding: steel erector, steel fabricator, structural erector	0.149104	-0.16221	0.46297	0.883443	Employment history	Sociodemographics	22601#53112564	Sociodemographics	0.751339	0.168296	-0.138359	0.464092
Job code - historical: Steel erectors	0.149104	-0.16221	0.46297	0.883443	Employment history	Sociodemographics	22617#5311	Sociodemographics	0.751339	0.168296	-0.138359	0.464092
Job coding: ship builder	0.128922	-0.140743	0.400813	0.883443	Employment history	Sociodemographics	22601#52142940	Sociodemographics	0.880498	0.106262	-0.215936	0.41668
Access to services score (Scotland)	0.00683209	-0.00752383	0.021188	0.883443	Indices of Multiple Deprivation	Sociodemographics	26433	Sociodemographics	0.997922	9.74961e-05	-0.01435	0.014545
Job coding: higher education teaching professional, university lecturer/professor (including college/university head/vice chancellor)	0.019605	-0.0215613	0.060827	0.883443	Employment history	Sociodemographics	22601#23113399	Sociodemographics	0.423898	0.0400599	-0.000881332	0.0808415
Job coding: coal worker or miner (surface or underground)	0.0600837	-0.0659766	0.186641	0.883443	Employment history	Sociodemographics	22601#81222848	Sociodemographics	0.975504	-0.0124987	-0.13896	0.112418
Job code - historical: Coal mine operatives	0.0600837	-0.0659766	0.186641	0.883443	Employment history	Sociodemographics	22617#8122	Sociodemographics	0.975504	-0.0124987	-0.13896	0.112418
Job coding: sign writer, letter writer	-0.253216	-0.779753	0.285789	0.883443	Employment history	Sociodemographics	22601#53232559	Sociodemographics	0.904561	0.152023	-0.396437	0.670039
Year immigrated to UK (United Kingdom)	0.0110521	-0.0122251	0.0343293	0.883443	Ethnicity	Sociodemographics	3659	Sociodemographics	0.699897	0.0143717	-0.00866462	0.037408
Particulate matter air pollution (pm10); 2010	-0.00167089	-0.00519438	0.00185259	0.883636	Residential air pollution	Sociodemographics	24005	Sociodemographics	0.912548	-0.000953975	-0.00447492	0.00256697
Job coding: property/housing/land manager	-0.0543874	-0.168885	0.0605774	0.883636	Employment history	Sociodemographics	22601#12313231	Sociodemographics	0.989949	0.00452764	-0.111239	0.119021
Job coding: routine laboratory tester	-0.123767	-0.384447	0.13967	0.883636	Employment history	Sociodemographics	22601#81382703	Sociodemographics	0.981033	-0.0289253	-0.457515	0.382884
Job coding: builder's labourer, building worker, hod carrier	-0.050486	-0.157567	0.0569878	0.883636	Employment history	Sociodemographics	22601#91212536	Sociodemographics	0.881336	-0.0360758	-0.144837	0.0716442
Workplace very cold	-0.0114441	-0.0358083	0.0129354	0.883636	Employment history	Sociodemographics	22607#2	Sociodemographics	0.890331	-0.00423214	-0.0178479	0.00938198
Mixture of day and night shifts worked: This type of shift pattern was not worked during job	-0.0108556	-0.0339676	0.0122701	0.883636	Employment history	Sociodemographics	22640#9	Sociodemographics	0.979775	-0.00191441	-0.0250964	0.0212251
Housing score (England)	0.00170722	-0.00193313	0.00534758	0.883636	Indices of Multiple Deprivation	Sociodemographics	26415	Sociodemographics	0.81615	-0.00172102	-0.00535819	0.00191615
Job code - historical: Property, housing and land managers	-0.0524536	-0.164155	0.0596906	0.883636	Employment history	Sociodemographics	22617#1231	Sociodemographics	0.982438	0.0070903	-0.105749	0.118716
Job coding: builder, building contractor	0.0899343	-0.102789	0.28372	0.888826	Employment history	Sociodemographics	22601#53192534	Sociodemographics	0.95683	-0.0549991	-0.399213	0.279287
Job coding: principal of dancing/drama/evening school, private music teacher	-0.10635	-0.335467	0.124794	0.892373	Employment history	Sociodemographics	22601#23193404	Sociodemographics	0.962134	0.0336076	-0.199912	0.261702
Job code - historical: Postal workers, mail sorters, messengers, couriers	0.0372895	-0.0435035	0.118299	0.892373	Employment history	Sociodemographics	22617#9211	Sociodemographics	0.989871	-0.00362825	-0.0847661	0.0768871
Job code - historical: Air transport operatives	0.134743	-0.157858	0.429789	0.892373	Employment history	Sociodemographics	22617#8218	Sociodemographics	0.912548	0.0783373	-0.21397	0.362083
Job coding: machine operator, rubber moulder, foreman	-0.144519	-0.457886	0.172765	0.892373	Employment history	Sociodemographics	22601#81152753	Sociodemographics	0.965627	-0.0384352	-0.362263	0.27606
Job code - historical: Rubber process operatives	-0.144519	-0.457886	0.172765	0.892373	Employment history	Sociodemographics	22617#8115	Sociodemographics	0.965627	-0.0384352	-0.362263	0.27606
Job code - historical: Careers advisers and vocational guidance specialists	-0.0462505	-0.147096	0.0549508	0.892373	Employment history	Sociodemographics	22617#3564	Sociodemographics	0.964461	-0.0127452	-0.11474	0.0882682
Natural environment percentage, buffer 1000m	0.00155682	-0.00184961	0.00496324	0.892373	Greenspace and coastal proximity	Sociodemographics	24506	Sociodemographics	0.888269	-0.00106694	-0.00447354	0.00233965
Job coding: school/student counsellor, school attendance officer	0.142591	-0.168145	0.456339	0.892373	Employment history	Sociodemographics	22601#32323113	Sociodemographics	0.964461	-0.0257938	-0.227155	0.171881
Job coding: dental nurse or assistant	0.0595198	-0.070636	0.190218	0.892373	Employment history	Sociodemographics	22601#61133076	Sociodemographics	0.925999	-0.0329648	-0.164601	0.0970807
Job code - historical: Dental nurses	0.0595198	-0.070636	0.190218	0.892373	Employment history	Sociodemographics	22617#6113	Sociodemographics	0.925999	-0.0329648	-0.164601	0.0970807
Attendance/disability/mobility allowance: Disability living allowance	0.00780252	-0.00933132	0.0249451	0.892373	Other sociodemographic factors	Sociodemographics	6146#2	Sociodemographics	0.868357	0.00618718	-0.0109442	0.0232925
Job coding: mathematician	0.0780141	-0.0929183	0.249906	0.892373	Employment history	Sociodemographics	22601#21133024	Sociodemographics	0.809626	0.0809401	-0.0889529	0.24776
Job coding: other assembler, routine operative	-0.0755383	-0.241057	0.0910085	0.892373	Employment history	Sociodemographics	22601#81392801	Sociodemographics	0.993398	-0.00495763	-0.218935	0.204722
Day shifts worked: This type of shift pattern was not worked during job	-0.00748829	-0.0239721	0.00899971	0.892373	Employment history	Sociodemographics	22630#9	Sociodemographics	0.795346	-0.00827293	-0.0247864	0.00822543
Job coding: jcb driver, plant operator, bulldozer driver, caterpillar driver	-0.173135	-0.551648	0.211096	0.892373	Employment history	Sociodemographics	22601#82292619	Sociodemographics	0.366089	-0.415753	-0.81954	-0.0201387
Job coding: undertaker, mortuary assistant, bearer, embalmer, crematorium worker	0.162781	-0.194717	0.523519	0.892373	Employment history	Sociodemographics	22601#62913119	Sociodemographics	0.850159	0.139757	-0.217081	0.48324
How are people in household related to participant: Grandparent	-0.0934902	-0.299182	0.113882	0.892373	Household	Sociodemographics	6141#5	Sociodemographics	0.661643	-0.143134	-0.356539	0.0668164
Job coding: electrical engineer, generating engineer, power engineer, power transmission engineer	-0.0413353	-0.132551	0.0501586	0.892373	Employment history	Sociodemographics	22601#21233041	Sociodemographics	0.675811	-0.0597789	-0.152096	0.0317513
Job coding: funeral director	0.211766	-0.253541	0.683572	0.892373	Employment history	Sociodemographics	22601#62913118	Sociodemographics	0.823517	0.209051	-0.249687	0.641868
Job coding: filing clerk, records assistant/clerk	-0.0420846	-0.135354	0.0514895	0.892764	Employment history	Sociodemographics	22601#41313256	Sociodemographics	0.993398	-0.00214291	-0.0961968	0.0910685
Job coding: electrician, electrical engineer, electrical contractor	-0.035233	-0.113353	0.0430906	0.892764	Employment history	Sociodemographics	22601#52412944	Sociodemographics	0.912548	-0.0212705	-0.0999307	0.0568061
Job coding: bleacher, dyer, treater etc.	0.155628	-0.188228	0.50289	0.89288	Employment history	Sociodemographics	22601#81142711	Sociodemographics	0.735144	0.190463	-0.145175	0.511941
Job coding: colliery agent/manager, quarry manager, offshore installation manager	0.142447	-0.174222	0.461916	0.895364	Employment history	Sociodemographics	22601#11232862	Sociodemographics	0.963162	0.0441733	-0.271917	0.349362
Year ended full time education	0.00124563	-0.00154398	0.00403525	0.895381	Work environment	Sociodemographics	22501	Sociodemographics	0.860386	0.00104495	-0.00174422	0.00383413
Job coding: collector/door-to-door salesperson, canvasser, credit agent, insurance agent, travelling salesperson, commercial traveller	-0.0316106	-0.102665	0.039615	0.898783	Employment history	Sociodemographics	22601#71213337	Sociodemographics	0.997922	-0.000481672	-0.0719386	0.0704848
Job code - historical: Collector salespersons and credit agents	-0.0316106	-0.102665	0.039615	0.898783	Employment history	Sociodemographics	22617#7121	Sociodemographics	0.997922	-0.000481672	-0.0719386	0.0704848
Job coding: storesman, warehouseman, porter	0.112893	-0.141152	0.368789	0.899093	Employment history	Sociodemographics	22601#91492718	Sociodemographics	0.995302	-0.00517748	-0.412161	0.38687
Job coding: database assistant/clerk, computer clerk, data entry clerk/processor, book keeping/accounts machinist	-0.0647044	-0.210944	0.0823321	0.901124	Employment history	Sociodemographics	22601#41363428	Sociodemographics	0.869369	-0.0532623	-0.202769	0.0942077
How are people in household related to participant: Brother and/or sister	-0.0214432	-0.070088	0.0272816	0.901286	Household	Sociodemographics	6141#3	Sociodemographics	0.987216	0.00254714	-0.0463074	0.0511752
Job code - historical: Construction trades n.e.c.	0.0542049	-0.0687065	0.177608	0.901286	Employment history	Sociodemographics	22617#5319	Sociodemographics	0.890964	0.0375915	-0.0853162	0.159009
Job coding: conservation or environmental protection officer, national park officer, marine/coastal conservationist, flood officer	-0.130407	-0.425769	0.168454	0.901286	Employment history	Sociodemographics	22601#35512494	Sociodemographics	0.883395	-0.0992938	-0.40666	0.20065
Job code - historical: Conservation and environmental protection officers	-0.130407	-0.425769	0.168454	0.901286	Employment history	Sociodemographics	22617#3551	Sociodemographics	0.883395	-0.0992938	-0.40666	0.20065
Employment score (Wales)	-0.00720415	-0.0236349	0.00922661	0.901286	Indices of Multiple Deprivation	Sociodemographics	26419	Sociodemographics	0.928275	-0.00394739	-0.0204865	0.0125918
Time employed in main current job	0.00199821	-0.00256444	0.00656086	0.901286	Employment	Sociodemographics	757	Sociodemographics	0.963162	-0.000611551	-0.00517854	0.00395544
Job code - historical: Plumbers, heating and ventilating engineers	0.0439775	-0.0563056	0.14458	0.901286	Employment history	Sociodemographics	22617#5314	Sociodemographics	0.975504	-0.00992707	-0.110534	0.0897137
Job coding: chemical engineer, plastics engineer, pharmaceutical engineer	-0.0567872	-0.186912	0.0739459	0.903609	Employment history	Sociodemographics	22601#21253043	Sociodemographics	0.78096	-0.0679638	-0.2007	0.0631911
Attendance/disability/mobility allowance: Blue badge	0.00813917	-0.0105511	0.0268396	0.903609	Other sociodemographic factors	Sociodemographics	6146#3	Sociodemographics	0.765326	-0.00999077	-0.0287168	0.00870388
Job coding: metal plate worker, boilermaker, plater-welder, caulker-burner, shipwright, riveter	0.0735276	-0.0954532	0.24341	0.903609	Employment history	Sociodemographics	22601#52142924	Sociodemographics	0.884689	-0.0548114	-0.22616	0.113906
Job coding: aircraft mechanic or maintenance engineer	0.179167	-0.232822	0.594729	0.903609	Employment history	Sociodemographics	22601#52232641	Sociodemographics	0.935369	0.0858898	-0.326439	0.480282
Job coding: illustrator, cartoonist, animator	-0.116073	-0.382975	0.153549	0.903609	Employment history	Sociodemographics	22601#34113148	Sociodemographics	0.867488	-0.10081	-0.37845	0.170385
Years since last cervical smear test	-0.00444796	-0.0147414	0.00584551	0.903609	Female-specific factors	Sociodemographics	2704	Sociodemographics	0.835144	0.00455401	-0.0057519	0.0148599
Traffic intensity on the nearest major road	-0.00147965	-0.00490928	0.00194997	0.903609	Residential air pollution	Sociodemographics	24011	Sociodemographics	0.824963	0.00159375	-0.00183409	0.00502158
Qualifications: College or University degree	0.00319518	-0.00422001	0.0106111	0.903609	Education	Sociodemographics	6138#1	Sociodemographics	0.191168	-0.00951802	-0.0169387	-0.00209954
Index of Multiple Deprivation (Scotland)	-0.00612107	-0.0203421	0.00809994	0.903609	Indices of Multiple Deprivation	Sociodemographics	26427	Sociodemographics	0.947326	0.00273942	-0.0115722	0.017051
Job coding: house cleaner, domestic, chambermaid, charlady	0.069406	-0.0925678	0.232219	0.903609	Employment history	Sociodemographics	22601#92332985	Sociodemographics	0.981033	0.0122346	-0.151161	0.173019
Job coding: clothing cutter	-0.102664	-0.341717	0.138618	0.903609	Employment history	Sociodemographics	22601#81362712	Sociodemographics	0.76002	0.129538	-0.110079	0.3628
Job code - historical: Clothing cutters	-0.102664	-0.341717	0.138618	0.903609	Employment history	Sociodemographics	22617#8136	Sociodemographics	0.76002	0.129538	-0.110079	0.3628
Job coding: vehicle body builder, coach builder, panel beater	-0.0893829	-0.298088	0.121022	0.904304	Employment history	Sociodemographics	22601#52322935	Sociodemographics	0.618653	-0.15577	-0.372602	0.0574038
Job coding: motor vehicle/industrial machinery fitter	-0.0686553	-0.229592	0.0932281	0.906083	Employment history	Sociodemographics	22601#52232941	Sociodemographics	0.735144	-0.226028	-0.620937	0.157801
Job coding: stage hand, props hand, scenery hand	-0.0995782	-0.333059	0.136009	0.906112	Employment history	Sociodemographics	22601#92293183	Sociodemographics	0.984682	-0.0139334	-0.253105	0.219918
Job coding: special needs teaching professional (including head teacher)	0.0253866	-0.0344505	0.0853439	0.906112	Employment history	Sociodemographics	22601#23163403	Sociodemographics	0.537644	0.048978	-0.0105319	0.108141
Job code - historical: Special needs education teaching professionals	0.0253866	-0.0344505	0.0853439	0.906112	Employment history	Sociodemographics	22617#2316	Sociodemographics	0.537644	0.048978	-0.0105319	0.108141
Length of time at current address	-0.00133978	-0.00451878	0.00183921	0.910982	Household	Sociodemographics	699	Sociodemographics	0.246979	-0.00383431	-0.00701375	-0.000654876
Job coding: other work in this industry: factory hand, mate, assistant, handler, loader	-0.108588	-0.367362	0.15268	0.914598	Employment history	Sociodemographics	22601#91392772	Sociodemographics	0.993648	-0.00568731	-0.329507	0.308405
Job coding: locomotive fireman	-0.181132	-0.610739	0.258042	0.914598	Employment history	Sociodemographics	22601#82162626	Sociodemographics	0.987216	0.0221875	-0.419842	0.443351
Job coding: hospital manager, health service manager, clinical manager, nursing service manager	0.0277418	-0.0389208	0.094548	0.915896	Employment history	Sociodemographics	22601#11813097	Sociodemographics	0.984157	0.00403274	-0.0629591	0.0705997
Job code - historical: Hospital and health service managers	0.0277418	-0.0389208	0.094548	0.915896	Employment history	Sociodemographics	22617#1181	Sociodemographics	0.984157	0.00403274	-0.0629591	0.0705997
Job coding: fork-lift truck driver or operator	0.106802	-0.149605	0.365277	0.916921	Employment history	Sociodemographics	22601#82222618	Sociodemographics	0.326689	0.269888	0.0195759	0.512906
Job code - historical: Fork-lift truck drivers	0.106802	-0.149605	0.365277	0.916921	Employment history	Sociodemographics	22617#8222	Sociodemographics	0.326689	0.269888	0.0195759	0.512906
Job coding: welder, fitter-welder	-0.062806	-0.214054	0.0892746	0.916957	Employment history	Sociodemographics	22601#52152925	Sociodemographics	0.850159	-0.0610484	-0.215413	0.0912033
Job coding: university lecturer/professor	0.0413408	-0.0586394	0.14164	0.91748	Employment history	Sociodemographics	22601#23113030	Sociodemographics	0.961543	0.0152211	-0.0849972	0.114475
Job coding: electronics engineer, broadcasting engineer, microwave engineer, radar engineer, radio engineer	-0.028933	-0.0990309	0.0413208	0.91748	Employment history	Sociodemographics	22601#21243042	Sociodemographics	0.979775	-0.00593207	-0.0763652	0.0640404
Breathing problems during period of job: No	-0.0186746	-0.0640209	0.0266043	0.91748	Employment history	Sociodemographics	22616#0	Sociodemographics	0.721087	0.0270944	-0.0182434	0.072622
Job coding: emergency services control room/radio operator/officer	0.0648536	-0.0925832	0.223056	0.918606	Employment history	Sociodemographics	22601#41423445	Sociodemographics	0.991238	-0.00865081	-0.268698	0.245052
Gap coding: Unpaid or voluntary work	-0.0172028	-0.0590844	0.0247322	0.918606	Employment history	Sociodemographics	22660#102	Sociodemographics	0.558899	-0.0338494	-0.0761125	0.00825232
Job coding: boat builder	0.257264	-0.366339	0.887342	0.918824	Employment history	Sociodemographics	22601#53152939	Sociodemographics	0.939173	0.125747	-0.501997	0.710193
Job coding: postal worker, postman, mail sorter, messenger, courier, mailroom clerk, post sorter, leaflet/circular distributor, newspaper/parcel deliverer	0.0501467	-0.0726632	0.173455	0.918824	Employment history	Sociodemographics	22601#92113352	Sociodemographics	0.835401	-0.046168	-0.152797	0.0594272
Job coding: ict or it manager, systems/data processing manager, telecom manager	-0.020942	-0.0723024	0.0305013	0.918824	Employment history	Sociodemographics	22601#11363057	Sociodemographics	0.835401	0.0222553	-0.029239	0.0735068
Job code - historical: Information and communication technology managers	-0.020942	-0.0723024	0.0305013	0.918824	Employment history	Sociodemographics	22617#1136	Sociodemographics	0.835401	0.0222553	-0.029239	0.0735068
Particulate matter air pollution (pm2.5); 2010	-0.00142358	-0.00492599	0.00207884	0.918824	Residential air pollution	Sociodemographics	24006	Sociodemographics	0.775945	0.00182892	-0.00167096	0.0053288
Job coding: pipe fitter	-0.128463	-0.443228	0.18992	0.918824	Employment history	Sociodemographics	22601#52162542	Sociodemographics	0.961543	0.0518834	-0.297021	0.387942
Job coding: community worker, day centre officer, youth leader, youth worker, parish worker, bail support officer	0.0253111	-0.0370433	0.0877936	0.918824	Employment history	Sociodemographics	22601#32313110	Sociodemographics	0.607242	0.0464023	-0.0158558	0.10828
Job code - historical: Youth and community workers	0.0253111	-0.0370433	0.0877936	0.918824	Employment history	Sociodemographics	22617#3231	Sociodemographics	0.607242	0.0464023	-0.0158558	0.10828
Job coding: financial services manager, chartered secretary, banker, merchant or investment banker, finance director, tax manager	-0.0517138	-0.179122	0.0762485	0.918824	Employment history	Sociodemographics	22601#11313221	Sociodemographics	0.845863	0.0522266	-0.0756752	0.178477
Job code - historical: Financial managers and chartered secretaries	-0.0517138	-0.179122	0.0762485	0.918824	Employment history	Sociodemographics	22617#1131	Sociodemographics	0.845863	0.0522266	-0.0756752	0.178477
Job coding: packer, bottler, canner, filler, wrapper, foreman	-0.0517571	-0.179563	0.0766249	0.918824	Employment history	Sociodemographics	22601#91342701	Sociodemographics	0.963162	0.0176883	-0.111538	0.145274
Job coding: security guard/officer, night watchman, store detective, private detective, bodyguard, gateman, door keeper, cctv operator, patrolman	0.0503342	-0.0742835	0.175442	0.918824	Employment history	Sociodemographics	22601#92413455	Sociodemographics	0.930519	-0.0280641	-0.154015	0.0964627
Job coding: health and safety officer, occupational hygienist, safety adviser	0.1278	-0.18766	0.446154	0.918824	Employment history	Sociodemographics	22601#35672874	Sociodemographics	0.982438	-0.0198567	-0.339484	0.290136
Job coding: clockmaker, watchmaker, clock and watch repairer	-0.21762	-0.752143	0.327211	0.918824	Employment history	Sociodemographics	22601#52242954	Sociodemographics	0.513076	-0.48976	-1.07022	0.0748747
Job code - historical: Labourers in building and woodworking trades	-0.0361815	-0.126155	0.0540686	0.918824	Employment history	Sociodemographics	22617#9121	Sociodemographics	0.823517	-0.0424814	-0.133775	0.0480775
Job coding: printer, master printer	0.0749598	-0.111396	0.262449	0.918824	Employment history	Sociodemographics	22601#54222887	Sociodemographics	0.665158	0.121566	-0.0625848	0.301963
Job code - historical: Printers	0.0749598	-0.111396	0.262449	0.918824	Employment history	Sociodemographics	22617#5422	Sociodemographics	0.665158	0.121566	-0.0625848	0.301963
Job coding: biologist, botanist, entomologist, zoologist, ecologist, microbiologist/pathologist/virologist/geneticist (not medically qualified)	-0.031702	-0.11067	0.0474852	0.918824	Employment history	Sociodemographics	22601#21123021	Sociodemographics	0.50695	-0.0711441	-0.151527	0.0086694
Job coding: advertising or public relations manager, media/publicity manager, campaign/fundraising manager	-0.0358667	-0.125302	0.0538438	0.918824	Employment history	Sociodemographics	22601#11343224	Sociodemographics	0.955494	-0.0155172	-0.106064	0.07427
Job coding: surveyor in mining/minerals, energy production or water supply	-0.0876899	-0.305834	0.132155	0.918824	Employment history	Sociodemographics	22601#24342863	Sociodemographics	0.980151	-0.0179892	-0.240174	0.199567
Job coding: clergyman/woman; any religious officer/leader	0.0359698	-0.053783	0.12599	0.918824	Employment history	Sociodemographics	22601#24443114	Sociodemographics	0.942436	0.0176242	-0.0721141	0.106572
Job code - historical: Clergy	0.0359698	-0.053783	0.12599	0.918824	Employment history	Sociodemographics	22617#2444	Sociodemographics	0.942436	0.0176242	-0.0721141	0.106572
Job code - historical: Inspectors of factories, utilities and trading standards	0.0832804	-0.124262	0.292121	0.918824	Employment history	Sociodemographics	22617#3565	Sociodemographics	0.993398	0.0048579	-0.203972	0.20955
Job coding: storesman, warehouseman, porter	0.108009	-0.161484	0.379595	0.919435	Employment history	Sociodemographics	22601#91492705	Sociodemographics	0.995302	-0.00517748	-0.412161	0.38687
Job coding: police officer (sergeant or below)	0.0239689	-0.0362085	0.0842622	0.920057	Employment history	Sociodemographics	22601#33123442	Sociodemographics	0.662262	-0.0406804	-0.101401	0.0197104
Job code - historical: Police officers (sergeant and below)	0.0239689	-0.0362085	0.0842622	0.920057	Employment history	Sociodemographics	22617#3312	Sociodemographics	0.662262	-0.0406804	-0.101401	0.0197104
Job code - historical: Construction operatives n.e.c.	-0.0433418	-0.152393	0.0661038	0.920968	Employment history	Sociodemographics	22617#8149	Sociodemographics	0.835144	-0.0482395	-0.158796	0.0612097
Job coding: storesman, warehouseman, porter	-0.240098	-0.837189	0.372874	0.920968	Employment history	Sociodemographics	22601#91492738	Sociodemographics	0.995302	-0.00517748	-0.412161	0.38687
Job coding: call centre operator, sales order clerk, telephone adviser	-0.0307852	-0.108523	0.0471574	0.920968	Employment history	Sociodemographics	22601#72113242	Sociodemographics	0.946753	-0.0151483	-0.0937693	0.0628994
Job coding: assembler, machine operator, foreman	-0.0550147	-0.194144	0.084808	0.920968	Employment history	Sociodemographics	22601#81322815	Sociodemographics	0.928275	-0.0333068	-0.174628	0.106141
Rest days during mixed shift periods	-0.0114865	-0.0406391	0.0176661	0.920968	Employment history	Sociodemographics	22645	Sociodemographics	0.892273	-0.00884334	-0.0379598	0.0202731
Job code - historical: Vehicle body builders and repairers	-0.0681668	-0.240734	0.105528	0.920968	Employment history	Sociodemographics	22617#5232	Sociodemographics	0.876508	-0.0617039	-0.238686	0.112535
Worked with pesticides: Rarely/never	-0.0212637	-0.0753778	0.0327518	0.920968	Employment history	Sociodemographics	22614#0	Sociodemographics	0.963162	-0.00717006	-0.0608362	0.0467753
Job code - historical: Electronics engineers	-0.0272	-0.0964526	0.0422049	0.922271	Employment history	Sociodemographics	22617#2124	Sociodemographics	0.955494	-0.0118227	-0.0814553	0.0573616
Period spent working day shifts	0.034332	-0.0534923	0.122156	0.923166	Employment history	Sociodemographics	22631	Sociodemographics	0.895735	-0.0256443	-0.111471	0.0601829
Workplace full of chemical or other fumes: Rarely/never	0.0109195	-0.0170365	0.0388539	0.923166	Employment history	Sociodemographics	22610#0	Sociodemographics	0.941305	0.00568015	-0.0222166	0.0336426
Job coding: packer, wrapper, foreman	0.186605	-0.288444	0.666515	0.923529	Employment history	Sociodemographics	22601#91342796	Sociodemographics	0.963162	-0.0332537	-0.271807	0.200135
Job coding: baggage handler	0.180644	-0.279907	0.646308	0.923529	Employment history	Sociodemographics	22601#82182643	Sociodemographics	0.867488	-0.17215	-0.646851	0.286975
Job coding: librarian, assistant librarian	-0.0425231	-0.1519	0.067275	0.924488	Employment history	Sociodemographics	22601#24513424	Sociodemographics	0.449806	-0.105971	-0.217914	0.00492004
Job coding: vocational or industrial trainer/instructor	0.129102	-0.201961	0.463497	0.924488	Employment history	Sociodemographics	22601#35633261	Sociodemographics	0.964461	0.0189387	-0.135628	0.171171
Comparative body size at age 10	-0.00253598	-0.00909207	0.0040201	0.925291	Early life factors	Sociodemographics	1687	Sociodemographics	0.000268058	-0.0154914	-0.0220472	-0.00893552
Job code - historical: Laboratory technicians	-0.0156591	-0.0561304	0.0248649	0.925291	Employment history	Sociodemographics	22617#3111	Sociodemographics	0.698524	-0.0254937	-0.0662324	0.0150938
Job coding: museum attendant, cloakroom attendant	0.174658	-0.274363	0.628606	0.925291	Employment history	Sociodemographics	22601#92493190	Sociodemographics	0.885666	0.140349	-0.310284	0.569522
Job coding: sales or marketing representative, manufacturer's agent or representative or salesman/woman	0.0236589	-0.0375661	0.0850069	0.925291	Employment history	Sociodemographics	22601#35423237	Sociodemographics	0.963162	0.00821355	-0.0531478	0.0692143
Job code - historical: Sales representatives	0.0236589	-0.0375661	0.0850069	0.925291	Employment history	Sociodemographics	22617#3542	Sociodemographics	0.963162	0.00821355	-0.0531478	0.0692143
Job code - historical: Business and related associate professionals n.e.c.	-0.0179476	-0.0646114	0.0287866	0.926505	Employment history	Sociodemographics	22617#3539	Sociodemographics	0.760741	-0.0256601	-0.0727197	0.0211992
Job code - historical: Social science researchers	0.0376726	-0.0607435	0.136406	0.926838	Employment history	Sociodemographics	22617#2322	Sociodemographics	0.964461	-0.0122088	-0.111267	0.0859155
Greenspace percentage, buffer 300m	0.00137077	-0.0022309	0.00497244	0.928246	Greenspace and coastal proximity	Sociodemographics	24503	Sociodemographics	0.963162	0.000501756	-0.00309736	0.00410088
Job coding: laboratory technician	-0.0359782	-0.130672	0.0590318	0.929962	Employment history	Sociodemographics	22601#31113086	Sociodemographics	0.979775	0.00787539	-0.0875545	0.102414
Access to services score (Wales)	0.00623264	-0.0102231	0.0226884	0.930701	Indices of Multiple Deprivation	Sociodemographics	26422	Sociodemographics	0.931911	0.00368116	-0.012883	0.0202454
Job coding: tree surgeon	0.136401	-0.223054	0.499123	0.931106	Employment history	Sociodemographics	22601#51192490	Sociodemographics	0.857773	0.134902	-0.224511	0.48072
Work hours per week - exact value	0.00380941	-0.00629876	0.0139176	0.931106	Employment history	Sociodemographics	22605	Sociodemographics	0.63481	0.00714334	-0.00295973	0.0172464
Job coding: weaver, knitter, carpet weaver, net maker	-0.0815453	-0.297648	0.136347	0.931106	Employment history	Sociodemographics	22601#54112877	Sociodemographics	0.878523	-0.0767622	-0.298991	0.140985
Job code - historical: Weavers and knitters	-0.0815453	-0.297648	0.136347	0.931106	Employment history	Sociodemographics	22617#5411	Sociodemographics	0.878523	-0.0767622	-0.298991	0.140985
Job coding: storesman, warehouseman, porter	0.19119	-0.313493	0.703866	0.931106	Employment history	Sociodemographics	22601#91492841	Sociodemographics	0.995302	-0.00517748	-0.412161	0.38687
Job coding: roundsman or woman, van salesperson, ice cream seller, milkman, mobile shop salesperson	0.0457692	-0.0759608	0.167961	0.931106	Employment history	Sociodemographics	22601#71233339	Sociodemographics	0.973531	0.0126642	-0.109155	0.133041
Job code - historical: Roundsmen/women and van salespersons	0.0457692	-0.0759608	0.167961	0.931106	Employment history	Sociodemographics	22617#7123	Sociodemographics	0.973531	0.0126642	-0.109155	0.133041
Job coding: packer, wrapper, foreman	0.107501	-0.178498	0.395859	0.931679	Employment history	Sociodemographics	22601#91342775	Sociodemographics	0.963162	-0.0332537	-0.271807	0.200135
Job coding: fashion designer, clothing and footwear designer, hat designer	-0.0816417	-0.299286	0.137702	0.931704	Employment history	Sociodemographics	22601#34223151	Sociodemographics	0.661643	-0.152248	-0.378526	0.0700431
Job coding: researcher in broadcasting, journalism, photography, printing and publishing	0.0634217	-0.105928	0.233741	0.931704	Employment history	Sociodemographics	22601#23293164	Sociodemographics	0.689498	0.105871	-0.0624556	0.271132
Job coding: ticket collector, railway porter	-0.0985825	-0.361883	0.167416	0.931794	Employment history	Sociodemographics	22601#62152629	Sociodemographics	0.848684	-0.10978	-0.383042	0.157425
How are people in household related to participant: Mother and/or father	-0.00964999	-0.0356647	0.0163866	0.931794	Household	Sociodemographics	6141#4	Sociodemographics	0.720281	-0.0156078	-0.0417509	0.0104739
Job coding: library assistant/clerk	0.0627978	-0.106739	0.233272	0.931794	Employment history	Sociodemographics	22601#41353425	Sociodemographics	0.965627	-0.020821	-0.192542	0.148191
Job code - historical: Quantity surveyors	0.0371874	-0.063448	0.138144	0.931794	Employment history	Sociodemographics	22617#2433	Sociodemographics	0.995776	0.00123617	-0.0996742	0.101171
Job coding: car paint sprayer, coach painter	-0.119421	-0.441302	0.207044	0.931794	Employment history	Sociodemographics	22601#52342937	Sociodemographics	0.981033	0.0229422	-0.308725	0.343951
Job coding: solicitor, lawyer, barrister, judge, coroner, articled clerk, attorney, advocate, stipendiary magistrate, fiscal/crown prosecutor, sheriff (scottish courts), legal services recorder	0.0232726	-0.0401517	0.0868276	0.932111	Employment history	Sociodemographics	22601#24113277	Sociodemographics	0.953606	0.0113354	-0.0522778	0.0745657
Job code - historical: Solicitors and lawyers, judges and coroners	0.0232726	-0.0401517	0.0868276	0.932111	Employment history	Sociodemographics	22617#2411	Sociodemographics	0.953606	0.0113354	-0.0522778	0.0745657
Job involved shift work: Yes	-0.00559199	-0.020861	0.00967996	0.932111	Employment history	Sociodemographics	22620#1	Sociodemographics	0.787713	-0.00777159	-0.0230629	0.00750892
Job code - historical: Plant and machine operatives n.e.c.	0.110053	-0.188949	0.412015	0.932111	Employment history	Sociodemographics	22617#8129	Sociodemographics	0.890331	-0.0942539	-0.402164	0.205905
Job coding: domestic or cleaning service manager	-0.0992527	-0.370349	0.174712	0.933544	Employment history	Sociodemographics	22601#12392994	Sociodemographics	0.845863	-0.115972	-0.398031	0.159695
Number of night shifts worked monthly during mixed shift periods	-0.00520756	-0.0195517	0.00913658	0.935033	Employment history	Sociodemographics	22643	Sociodemographics	0.806302	0.00695194	-0.00741322	0.0213171
Birth weight of first child	0.00338342	-0.0059615	0.0127283	0.936245	Female-specific factors	Sociodemographics	2744	Sociodemographics	0.819791	0.0043872	-0.00493141	0.0137058
Sum of road length of major roads within 100m	0.00352172	-0.00621582	0.0132593	0.936245	Residential air pollution	Sociodemographics	24015	Sociodemographics	0.980537	0.000790678	-0.00894158	0.0105229
Job coding: public relations officer, press officer, information officer	0.0667669	-0.117516	0.252078	0.936245	Employment history	Sociodemographics	22601#34333162	Sociodemographics	0.809626	0.0874803	-0.0961531	0.267461
Job coding: careers adviser or vocational guidance specialist, placement advisor	-0.0528791	-0.199824	0.0948494	0.937294	Employment history	Sociodemographics	22601#35643209	Sociodemographics	0.986741	-0.0188074	-0.36601	0.317523
Job code - historical: Rail transport operatives	-0.0571859	-0.21613	0.102697	0.937294	Employment history	Sociodemographics	22617#8216	Sociodemographics	0.972658	-0.016926	-0.178088	0.141751
Job coding: ship, merchant navy or hovercraft captain/officer/navigator, master mariner, skipper	-0.0569175	-0.21538	0.102415	0.937294	Employment history	Sociodemographics	22601#35132647	Sociodemographics	0.955494	0.0271493	-0.132527	0.18424
Job coding: motor mechanic, diesel fitter, auto engineer	0.0311224	-0.0566425	0.119135	0.941303	Employment history	Sociodemographics	22601#52312934	Sociodemographics	0.835144	0.0381242	-0.0494135	0.124907
Job code - historical: Chemical engineers	-0.0455294	-0.174335	0.0838683	0.941303	Employment history	Sociodemographics	22617#2125	Sociodemographics	0.803947	-0.0637165	-0.194934	0.0659469
Job coding: medical radiographer, x-ray operator, sonographer	-0.0593529	-0.227168	0.109466	0.941303	Employment history	Sociodemographics	22601#32143084	Sociodemographics	0.975504	-0.0167832	-0.187498	0.151214
Job code - historical: Medical radiographers	-0.0593529	-0.227168	0.109466	0.941303	Employment history	Sociodemographics	22617#3214	Sociodemographics	0.975504	-0.0167832	-0.187498	0.151214
Job coding: hotel or guesthouse owner/manager; hostel warden, holiday camp manager, caravan/camping site owner/manager	-0.0360868	-0.138371	0.0665635	0.941303	Employment history	Sociodemographics	22601#12213392	Sociodemographics	0.900554	0.0297169	-0.0731367	0.131504
Job code - historical: Hotel and accommodation managers	-0.0360868	-0.138371	0.0665635	0.941303	Employment history	Sociodemographics	22617#1221	Sociodemographics	0.900554	0.0297169	-0.0731367	0.131504
Job coding: ship builder	-0.112919	-0.432676	0.210172	0.941303	Employment history	Sociodemographics	22601#52142581	Sociodemographics	0.880498	0.106262	-0.215936	0.41668
Time since last menstrual period	0.00366211	-0.00678149	0.0141057	0.941303	Female-specific factors	Sociodemographics	3700	Sociodemographics	0.743191	0.00594533	-0.00447927	0.0163699
Job code - historical: Production, works and maintenance managers	-0.0238806	-0.0922749	0.0446661	0.943832	Employment history	Sociodemographics	22617#1121	Sociodemographics	0.602397	-0.0518559	-0.120912	0.0167697
Job code - historical: Road construction operatives	0.0730814	-0.13723	0.284785	0.944066	Employment history	Sociodemographics	22617#8142	Sociodemographics	0.930509	-0.047975	-0.262007	0.161987
Job coding: midwife	-0.0264625	-0.102895	0.0501638	0.944066	Employment history	Sociodemographics	22601#32123074	Sociodemographics	0.922556	-0.0196537	-0.0968652	0.0570054
Job code - historical: Midwives	-0.0264625	-0.102895	0.0501638	0.944066	Employment history	Sociodemographics	22617#3212	Sociodemographics	0.922556	-0.0196537	-0.0968652	0.0570054
Current employment status: Retired	-0.00355945	-0.0138543	0.00673534	0.944066	Employment	Sociodemographics	6142#2	Sociodemographics	0.321316	-0.011325	-0.0216087	-0.00104157
Number of gap periods	-0.00457451	-0.0179342	0.00878514	0.945178	Employment history	Sociodemographics	22661	Sociodemographics	0.864451	-0.00494021	-0.0182931	0.00841268
Job coding: careers adviser or vocational guidance specialist, placement advisor	0.212728	-0.402874	0.837087	0.945373	Employment history	Sociodemographics	22601#35643286	Sociodemographics	0.986741	-0.0188074	-0.36601	0.317523
Job coding: school/college caretaker/porter	0.073611	-0.14126	0.290064	0.946026	Employment history	Sociodemographics	22601#62323000	Sociodemographics	0.978342	0.0195886	-0.197373	0.231907
Job coding: routine inspector, tester	0.0704938	-0.135915	0.278253	0.947491	Employment history	Sociodemographics	22601#81332797	Sociodemographics	0.993648	-0.00484402	-0.266026	0.249885
Job coding: school mid-day assistant, dinner or school meals supervisor or assistant, lunchtime supervisor	-0.0504017	-0.198521	0.0985247	0.947491	Employment history	Sociodemographics	22601#92443411	Sociodemographics	0.905919	-0.0419018	-0.192675	0.106769
Job code - historical: School mid-day assistants	-0.0504017	-0.198521	0.0985247	0.947491	Employment history	Sociodemographics	22617#9244	Sociodemographics	0.905919	-0.0419018	-0.192675	0.106769
Job coding: motor vehicle/industrial machinery fitter	-0.12609	-0.497934	0.251074	0.947491	Employment history	Sociodemographics	22601#52232930	Sociodemographics	0.735144	-0.226028	-0.620937	0.157801
Job coding: railway signal technician, signal inspector	0.100501	-0.197856	0.401643	0.947491	Employment history	Sociodemographics	22601#52492632	Sociodemographics	0.605123	-0.230639	-0.54108	0.0729507
Job code - historical: Kitchen and catering assistants	-0.0299153	-0.119463	0.0598972	0.947491	Employment history	Sociodemographics	22617#9223	Sociodemographics	0.964007	-0.011735	-0.102366	0.0781383
Job coding: typist, shorthand typist, transcriber, stenographer	-0.0128273	-0.0512925	0.0256801	0.947491	Employment history	Sociodemographics	22601#42173304	Sociodemographics	0.963162	0.00512706	-0.0333428	0.0434722
Job code - historical: Typists	-0.0128273	-0.0512925	0.0256801	0.947491	Employment history	Sociodemographics	22617#4217	Sociodemographics	0.963162	0.00512706	-0.0333428	0.0434722
Job coding: routine laboratory tester	-0.161528	-0.641006	0.327848	0.947491	Employment history	Sociodemographics	22601#81382777	Sociodemographics	0.981033	-0.0289253	-0.457515	0.382884
Job coding: metal machine setter, tool setter, setter operator, centre lathe turner	0.0378652	-0.0756015	0.151746	0.947491	Employment history	Sociodemographics	22601#52212927	Sociodemographics	0.96339	0.0148984	-0.0986043	0.127137
Job code - historical: Metal machining setters and setter-operators	0.0378652	-0.0756015	0.151746	0.947491	Employment history	Sociodemographics	22617#5221	Sociodemographics	0.96339	0.0148984	-0.0986043	0.127137
Job coding: estate agent, auctioneer, land agent, letting agent	-0.0403353	-0.161175	0.0810199	0.947491	Employment history	Sociodemographics	22601#35443245	Sociodemographics	0.963162	-0.0173649	-0.139749	0.103619
Job code - historical: Estate agents, auctioneers	-0.0403353	-0.161175	0.0810199	0.947491	Employment history	Sociodemographics	22617#3544	Sociodemographics	0.963162	-0.0173649	-0.139749	0.103619
Job coding: other assembler, routine operative	-0.0683628	-0.273417	0.13823	0.947491	Employment history	Sociodemographics	22601#81392707	Sociodemographics	0.993398	-0.00495763	-0.218935	0.204722
Job coding: personnel or industrial relations officer, recruitment consultant	-0.0617395	-0.247172	0.124987	0.947491	Employment history	Sociodemographics	22601#35623273	Sociodemographics	0.981033	0.0151538	-0.182485	0.209
Job coding: personnel or industrial relations officer, recruitment consultant	-0.0872176	-0.349087	0.177297	0.947491	Employment history	Sociodemographics	22601#35623284	Sociodemographics	0.981033	0.0151538	-0.182485	0.209
Job coding: probation officer, community service officer	0.049155	-0.0992801	0.198296	0.947491	Employment history	Sociodemographics	22601#24433109	Sociodemographics	0.957816	0.0234784	-0.125317	0.170028
Worked with paints, thinners or glues	0.0063419	-0.0128875	0.02558	0.947491	Employment history	Sociodemographics	22613#1	Sociodemographics	0.280194	0.022107	0.00291191	0.0412816
Workplace very dusty	-0.00740785	-0.0298822	0.0150788	0.947491	Employment history	Sociodemographics	22609#2	Sociodemographics	0.927938	0.00351365	-0.0108617	0.0178834
Job code - historical: Goldsmiths, silversmiths, precious stone workers	-0.0926173	-0.373405	0.191045	0.947491	Employment history	Sociodemographics	22617#5495	Sociodemographics	0.798621	-0.143218	-0.435766	0.142822
Job coding: credit controller/supervisor	0.048577	-0.0992204	0.197064	0.947491	Employment history	Sociodemographics	22601#41213240	Sociodemographics	0.953606	-0.0251003	-0.166247	0.114222
Job coding: assembler, machine operator, foreman	0.0370955	-0.0762974	0.150912	0.947491	Employment history	Sociodemographics	22601#81322804	Sociodemographics	0.928275	-0.0333068	-0.174628	0.106141
Job coding: shipping manager, oil distribution terminal manager	-0.138532	-0.55961	0.289933	0.947491	Employment history	Sociodemographics	22601#11613348	Sociodemographics	0.219646	-0.563152	-1.01903	-0.114837
Job code - historical: Computer engineers, installation and maintenance	-0.0321267	-0.130769	0.0668495	0.947491	Employment history	Sociodemographics	22617#5245	Sociodemographics	0.963162	-0.0140264	-0.113676	0.0846917
Job coding: inspector of factories, utilities or trading standards	0.134525	-0.276751	0.550802	0.947491	Employment history	Sociodemographics	22601#35652696	Sociodemographics	0.735144	-0.245285	-0.673665	0.17125
Job coding: advertising or sales representative, demonstrator, estate agent negotiator, land/property salesman	0.0240671	-0.0501762	0.0984917	0.947491	Employment history	Sociodemographics	22601#71293343	Sociodemographics	0.868357	0.0267771	-0.0474509	0.100471
Job coding: museum guide	0.150781	-0.311063	0.619634	0.947491	Employment history	Sociodemographics	22601#62113189	Sociodemographics	0.858894	0.170596	-0.290289	0.607004
Job code - historical: Elementary sales occupations n.e.c.	-0.0448893	-0.184423	0.0953573	0.947491	Employment history	Sociodemographics	22617#9259	Sociodemographics	0.980151	-0.0114922	-0.153074	0.128186
Job coding: quality control engineer	-0.173781	-0.7097	0.373164	0.947491	Employment history	Sociodemographics	22601#21282870	Sociodemographics	0.853541	-0.218609	-0.787568	0.326248
Job coding: routine inspector, tester	0.0962327	-0.202538	0.397602	0.947491	Employment history	Sociodemographics	22601#81332702	Sociodemographics	0.993648	-0.00484402	-0.266026	0.249885
Job coding: public service higher/senior executive officer, hospital administrator	-0.0116593	-0.0480324	0.0247546	0.947491	Employment history	Sociodemographics	22601#35613203	Sociodemographics	0.986741	0.00202053	-0.0344753	0.0383967
Job code - historical: Public service associate professionals	-0.0116593	-0.0480324	0.0247546	0.947491	Employment history	Sociodemographics	22617#3561	Sociodemographics	0.986741	0.00202053	-0.0344753	0.0383967
Job coding: bouncer, or other jobs in entertainment places, including casino/night club porter, etc.	0.090882	-0.192221	0.37626	0.947491	Employment history	Sociodemographics	22601#92493196	Sociodemographics	0.798621	0.137095	-0.144542	0.409901
Gas or solid-fuel cooking/heating: An open solid fuel fire that you use regularly in winter time	0.00376881	-0.00804132	0.0155827	0.947491	Household	Sociodemographics	6139#3	Sociodemographics	0.693662	0.00745367	-0.00435107	0.0192476
Job code - historical: Engineering technicians	-0.0203181	-0.0842071	0.0437016	0.947491	Employment history	Sociodemographics	22617#3113	Sociodemographics	0.879837	-0.0219383	-0.086181	0.0419198
Job coding: packer, wrapper, foreman	-0.174999	-0.72095	0.384256	0.947491	Employment history	Sociodemographics	22601#91342806	Sociodemographics	0.963162	-0.0332537	-0.271807	0.200135
Particulate matter air pollution 2.5-10um; 2010	-0.00111532	-0.00464169	0.00241105	0.947491	Residential air pollution	Sociodemographics	24008	Sociodemographics	0.997922	-2.44272e-05	-0.00354825	0.0034994
Job coding: occupational therapist	0.0371815	-0.0802279	0.155042	0.947491	Employment history	Sociodemographics	22601#32223079	Sociodemographics	0.991238	0.00420866	-0.114259	0.121346
Job code - historical: Occupational therapists	0.0371815	-0.0802279	0.155042	0.947491	Employment history	Sociodemographics	22617#3222	Sociodemographics	0.991238	0.00420866	-0.114259	0.121346
Job code - historical: Animal care occupations n.e.c.	-0.0495227	-0.206463	0.108277	0.947491	Employment history	Sociodemographics	22617#6139	Sociodemographics	0.95683	-0.0258267	-0.186135	0.132157
Average night-time sound level of noise pollution	0.00107855	-0.00235059	0.00450768	0.947491	Residential noise pollution	Sociodemographics	24022	Sociodemographics	0.506758	0.00305051	-0.00037683	0.00647785
Average daytime sound level of noise pollution	0.00107754	-0.00235159	0.00450668	0.947491	Residential noise pollution	Sociodemographics	24020	Sociodemographics	0.506758	0.00304846	-0.000378883	0.0064758
Workplace full of chemical or other fumes	0.00879637	-0.0192661	0.0368819	0.947491	Employment history	Sociodemographics	22610#2	Sociodemographics	0.906029	-0.00454902	-0.0208298	0.0117187
Gap coding: Unemployed	-0.0110632	-0.0464168	0.0243263	0.947491	Employment history	Sociodemographics	22660#107	Sociodemographics	0.933546	0.00762944	-0.0278928	0.0430419
Inverse distance to the nearest road	-0.00106693	-0.00449554	0.00236168	0.947491	Residential air pollution	Sociodemographics	24010	Sociodemographics	0.850159	0.00136789	-0.00205894	0.00479471
Job coding: laboratory technician, scientific assistant, cytology screener; hospital, medical or health technician	-0.0136537	-0.0575502	0.030306	0.947491	Employment history	Sociodemographics	22601#31113033	Sociodemographics	0.616984	-0.032378	-0.0766066	0.0116721
Crime score (England)	-0.0011276	-0.00476038	0.00250518	0.947491	Indices of Multiple Deprivation	Sociodemographics	26416	Sociodemographics	0.809626	0.0017445	-0.0018851	0.0053741
Job coding: drainage worker, ditch digger	-0.0954312	-0.401237	0.214568	0.947491	Employment history	Sociodemographics	22601#91292584	Sociodemographics	0.954492	-0.0548732	-0.371628	0.253041
Job code - historical: Leisure and theme park attendants	-0.0520137	-0.219781	0.116782	0.947491	Employment history	Sociodemographics	22617#9226	Sociodemographics	0.845863	-0.0715706	-0.243602	0.0978916
Job code - historical: Industrial cleaning process occupations	-0.0428865	-0.181346	0.0962602	0.947491	Employment history	Sociodemographics	22617#9132	Sociodemographics	0.850159	-0.0558331	-0.197121	0.0836936
Average evening sound level of noise pollution	0.00105826	-0.00237088	0.0044874	0.947491	Residential noise pollution	Sociodemographics	24021	Sociodemographics	0.506758	0.00304626	-0.000381076	0.0064736
Job coding: routine laboratory tester	0.16948	-0.37541	0.721347	0.947491	Employment history	Sociodemographics	22601#81382736	Sociodemographics	0.981033	-0.0289253	-0.457515	0.382884
Job coding: nurse (of any kind, at any level)	0.00941223	-0.0212451	0.0400973	0.947491	Employment history	Sociodemographics	22601#32113072	Sociodemographics	0.825043	0.0142083	-0.0164958	0.0448375
Job code - historical: Beauticians and related occupations	0.0630189	-0.141718	0.269105	0.947491	Employment history	Sociodemographics	22617#6222	Sociodemographics	0.845863	0.0854158	-0.11969	0.286162
Job code - historical: Chemical and related process operatives	0.0509496	-0.114996	0.217767	0.947491	Employment history	Sociodemographics	22617#8114	Sociodemographics	0.868357	0.0594209	-0.106146	0.222138
Job coding: management accountant, works accountant, cost accountant	0.0224192	-0.0508299	0.095844	0.947491	Employment history	Sociodemographics	22601#24223282	Sociodemographics	0.971245	-0.0081529	-0.0819444	0.0651328
Job code - historical: Management accountants	0.0224192	-0.0508299	0.095844	0.947491	Employment history	Sociodemographics	22617#2422	Sociodemographics	0.971245	-0.0081529	-0.0819444	0.0651328
Job coding: legal secretary	-0.0248225	-0.106085	0.0566672	0.947491	Employment history	Sociodemographics	22601#42123299	Sociodemographics	0.884689	-0.0263622	-0.108493	0.0551458
Usual length of each night shift during mixed shift periods	-0.00849566	-0.0363478	0.0193565	0.947491	Employment history	Sociodemographics	22642	Sociodemographics	0.956103	-0.00468259	-0.0326672	0.023302
Current employment status: Doing unpaid or voluntary work	0.00551412	-0.0125682	0.0236059	0.947491	Employment	Sociodemographics	6142#6	Sociodemographics	0.996755	0.000193667	-0.0178978	0.0182562
How are people in household related to participant: Other unrelated	0.00816511	-0.0186218	0.0349749	0.947491	Household	Sociodemographics	6141#8	Sociodemographics	0.997643	-0.000234713	-0.0270633	0.0265271
Job coding: advertising or sales representative, demonstrator, estate agent negotiator, land/property salesman	-0.0408223	-0.174877	0.0938678	0.947491	Employment history	Sociodemographics	22601#71293332	Sociodemographics	0.868357	0.0267771	-0.0474509	0.100471
Job coding: dancer, ballet dancer, dance instructor, choreographer	0.0751684	-0.171662	0.323893	0.947491	Employment history	Sociodemographics	22601#34143169	Sociodemographics	0.764709	0.131332	-0.113571	0.369478
Job code - historical: Dancers and choreographers	0.0751684	-0.171662	0.323893	0.947491	Employment history	Sociodemographics	22617#3414	Sociodemographics	0.764709	0.131332	-0.113571	0.369478
Job coding: office manager, account/payrolls manager, administration manager, litigation/solicitor's office manager	-0.0185607	-0.0797646	0.0427675	0.947491	Employment history	Sociodemographics	22601#11523251	Sociodemographics	0.931911	-0.0134667	-0.0751331	0.0478455
Job code - historical: Office managers	-0.0185607	-0.0797646	0.0427675	0.947491	Employment history	Sociodemographics	22617#1152	Sociodemographics	0.931911	-0.0134667	-0.0751331	0.0478455
Job coding: car hirer, skip hire operator, rental operator, sales promoter, film/video renter, money lender	0.179998	-0.408627	0.777401	0.947491	Employment history	Sociodemographics	22601#71293344	Sociodemographics	0.989851	-0.0274426	-0.638201	0.550498
Job coding: vocational or industrial trainer/instructor	-0.046399	-0.199486	0.107523	0.947491	Employment history	Sociodemographics	22601#35633274	Sociodemographics	0.964461	0.0189387	-0.135628	0.171171
Job coding: machine operator, processor, foreman	-0.0407577	-0.175342	0.0944705	0.947491	Employment history	Sociodemographics	22601#81112700	Sociodemographics	0.985844	0.00782206	-0.128228	0.142112
Job code - historical: Food, drink and tobacco process operatives	-0.0407577	-0.175342	0.0944705	0.947491	Employment history	Sociodemographics	22617#8111	Sociodemographics	0.985844	0.00782206	-0.128228	0.142112
Job coding: ship's mate	0.116649	-0.268619	0.505908	0.947491	Employment history	Sociodemographics	22601#35132649	Sociodemographics	0.879837	-0.131964	-0.527559	0.25079
Job coding: gardener, groundsman/groundswoman, park keeper, landscape gardener, greenkeeper, turf cutter	0.0258432	-0.0599248	0.111849	0.947491	Employment history	Sociodemographics	22601#51132488	Sociodemographics	0.931911	-0.0188837	-0.105387	0.0669303
Job code - historical: Gardeners and groundsmen/groundswomen	0.0258432	-0.0599248	0.111849	0.947491	Employment history	Sociodemographics	22617#5113	Sociodemographics	0.931911	-0.0188837	-0.105387	0.0669303
Job code - historical: Teaching professionals n.e.c.	0.0154973	-0.0360367	0.067117	0.947491	Employment history	Sociodemographics	22617#2319	Sociodemographics	0.339671	0.0550313	0.00372209	0.106085
Age last used hormone-replacement therapy (HRT)	-0.00215013	-0.00930748	0.00500721	0.947491	Female-specific factors	Sociodemographics	3546	Sociodemographics	0.993648	-0.000130484	-0.00731533	0.00705437
Job coding: bus or coach driver, minibus driver	-0.0306578	-0.132715	0.0717568	0.947491	Employment history	Sociodemographics	22601#82132606	Sociodemographics	0.970159	-0.0117363	-0.114802	0.0903327
Job code - historical: Education officers, school inspectors	0.0188388	-0.0442345	0.0820444	0.947491	Employment history	Sociodemographics	22617#2313	Sociodemographics	0.96339	-0.00837175	-0.0716543	0.0545305
Job coding: regulation compliance inspector/examiner including driving/flight/railway examiner/inspector, vehicle tester	0.152372	-0.354324	0.667417	0.947491	Employment history	Sociodemographics	22601#35663464	Sociodemographics	0.993398	0.0118595	-0.503344	0.50222
Ever used hormone-replacement therapy (HRT)	0.00311694	-0.00735259	0.0135871	0.947491	Female-specific factors	Sociodemographics	2814	Sociodemographics	0.719905	0.00627288	-0.00419608	0.0167408
Job coding: day nursery manager or owner	-0.057385	-0.249474	0.136058	0.947491	Employment history	Sociodemographics	22601#23193429	Sociodemographics	0.979775	0.016188	-0.178566	0.207315
Period spent working mix of day and night shifts	-0.0074447	-0.0324627	0.0175733	0.947491	Employment history	Sociodemographics	22641	Sociodemographics	0.971245	0.00270553	-0.0223046	0.0277157
Job code - historical: Routine inspectors and testers	0.030307	-0.0715371	0.13249	0.947491	Employment history	Sociodemographics	22617#8133	Sociodemographics	0.944801	-0.0199093	-0.122476	0.081659
Job coding: other assembler, routine operative	-0.101772	-0.442593	0.24368	0.947491	Employment history	Sociodemographics	22601#81392771	Sociodemographics	0.993398	-0.00495763	-0.218935	0.204722
Job code - historical: Traffic wardens	0.115761	-0.274904	0.510581	0.947491	Employment history	Sociodemographics	22617#9242	Sociodemographics	0.933546	0.0835263	-0.311647	0.463619
Job coding: social services manager, community care manager, welfare services manager	-0.0221088	-0.0971662	0.0531431	0.947491	Employment history	Sociodemographics	22601#11843115	Sociodemographics	0.989949	0.00326188	-0.0722391	0.0782184
Job code - historical: Social services managers	-0.0221088	-0.0971662	0.0531431	0.947491	Employment history	Sociodemographics	22617#1184	Sociodemographics	0.989949	0.00326188	-0.0722391	0.0782184
Job coding: farm manager, agricultural manager	-0.05907	-0.260545	0.143796	0.947491	Employment history	Sociodemographics	22601#12112477	Sociodemographics	0.316075	-0.230816	-0.440613	-0.0240996
Job coding: statistician	-0.0502853	-0.222031	0.122526	0.947491	Employment history	Sociodemographics	22601#24233025	Sociodemographics	0.668084	-0.115891	-0.292466	0.0581611
Job code - historical: Packers, bottlers, canners, fillers	-0.0249511	-0.110974	0.0613262	0.947491	Employment history	Sociodemographics	22617#9134	Sociodemographics	0.675811	0.055838	-0.0302611	0.141186
Job coding: prison service officer (below principal officer), prison warder	-0.0603628	-0.268207	0.149007	0.947491	Employment history	Sociodemographics	22601#33143448	Sociodemographics	0.879837	0.0715699	-0.138193	0.276853
Job code - historical: Prison service officers (below principal officer)	-0.0603628	-0.268207	0.149007	0.947491	Employment history	Sociodemographics	22617#3314	Sociodemographics	0.879837	0.0715699	-0.138193	0.276853
Job coding: market or street trader/assistant, stall holder, newspaper seller	0.0621017	-0.15186	0.277569	0.947491	Employment history	Sociodemographics	22601#71243340	Sociodemographics	0.743191	0.119419	-0.0930333	0.326817
Job code - historical: Market and street traders and assistants	0.0621017	-0.15186	0.277569	0.947491	Employment history	Sociodemographics	22617#7124	Sociodemographics	0.743191	0.119419	-0.0930333	0.326817
Job coding: marketing research professional, marketing consultant, promotions or advertising consultant, fundraiser consultant, appeals organiser	0.0230509	-0.0571652	0.103481	0.947491	Employment history	Sociodemographics	22601#35433238	Sociodemographics	0.987216	0.00400327	-0.07666	0.0840409
Job code - historical: Marketing associate professionals	0.0230509	-0.0571652	0.103481	0.947491	Employment history	Sociodemographics	22617#3543	Sociodemographics	0.987216	0.00400327	-0.07666	0.0840409
Job coding: actor, chorister or singer	-0.0476406	-0.213761	0.119477	0.947491	Employment history	Sociodemographics	22601#34133166	Sociodemographics	0.994236	0.00267017	-0.16605	0.168658
Job coding: water or sewage plant operator	0.0754815	-0.187563	0.340415	0.947491	Employment history	Sociodemographics	22601#81262854	Sociodemographics	0.513076	0.216583	-0.0408452	0.466065
Job code - historical: Water and sewerage plant operatives	0.0754815	-0.187563	0.340415	0.947491	Employment history	Sociodemographics	22617#8126	Sociodemographics	0.513076	0.216583	-0.0408452	0.466065
Job coding: social worker, child care/protection officer, adoption officer, mental health officer, almoner, family case worker	0.0150562	-0.0376426	0.0678475	0.947491	Employment history	Sociodemographics	22601#24423108	Sociodemographics	0.987216	0.00258498	-0.0502056	0.0551142
Job code - historical: Social workers	0.0150562	-0.0376426	0.0678475	0.947491	Employment history	Sociodemographics	22617#2442	Sociodemographics	0.987216	0.00258498	-0.0502056	0.0551142
Job coding: filing clerk, records assistant/clerk, technical clerk	0.0663291	-0.165709	0.300064	0.947491	Employment history	Sociodemographics	22601#41313427	Sociodemographics	0.695204	-0.149525	-0.388669	0.0850541
Number of spontaneous miscarriages	-0.00447153	-0.020184	0.0112409	0.947491	Female-specific factors	Sociodemographics	3839	Sociodemographics	0.89231	-0.0047332	-0.0203966	0.0109302
Job coding: customer care adviser/officer/assistant, store guide, customer relations officer/representative	-0.0165993	-0.0750595	0.0419733	0.947491	Employment history	Sociodemographics	22601#72123243	Sociodemographics	0.981903	0.00384075	-0.0550131	0.0623724
Job coding: senior officer in customs and excise or immigration including senior inspector, customs and excise surveyor, immigration officer	-0.0906988	-0.409221	0.231531	0.947491	Employment history	Sociodemographics	22601#11733451	Sociodemographics	0.880498	-0.109818	-0.440802	0.211731
Job code - historical: Researchers n.e.c.	0.0184624	-0.0470147	0.0840802	0.947491	Employment history	Sociodemographics	22617#2329	Sociodemographics	0.930509	0.0146908	-0.050965	0.0799383
Job coding: routine laboratory tester	0.105702	-0.267172	0.483253	0.947491	Employment history	Sociodemographics	22601#81382767	Sociodemographics	0.981033	-0.0289253	-0.457515	0.382884
Community safety score (Wales)	-0.00462481	-0.0210691	0.0118195	0.947491	Indices of Multiple Deprivation	Sociodemographics	26425	Sociodemographics	0.743191	-0.00941674	-0.0259687	0.00713521
Job coding: factory/works manager, shift manager	-0.0279287	-0.127366	0.0718423	0.947491	Employment history	Sociodemographics	22601#11212693	Sociodemographics	0.879837	-0.0340788	-0.134406	0.0653142
Job coding: broker, financial/insurance broker, foreign exchange dealer, ship/marine broker, stockbroker, commodity trader	0.0395191	-0.101451	0.18114	0.947491	Employment history	Sociodemographics	22601#35323265	Sociodemographics	0.928784	0.0331267	-0.108213	0.172456
Current employment status: In paid employment or self-employed	-0.00236073	-0.0108133	0.00609168	0.947491	Employment	Sociodemographics	6142#1	Sociodemographics	0.971245	0.000913952	-0.00753292	0.00936084
Job coding: storesman, warehouseman, porter	-0.065708	-0.300513	0.171379	0.947491	Employment history	Sociodemographics	22601#91492829	Sociodemographics	0.995302	-0.00517748	-0.412161	0.38687
Housing score (Scotland)	-0.00394847	-0.0182454	0.0103485	0.947491	Indices of Multiple Deprivation	Sociodemographics	26432	Sociodemographics	0.955494	0.00244747	-0.0119404	0.0168354
Job coding: goldsmith, silversmith	-0.12026	-0.551848	0.318314	0.947491	Employment history	Sociodemographics	22601#54952914	Sociodemographics	0.513076	-0.396597	-0.860186	0.0562605
Job coding: painter, calligrapher, portrait engraver, art restorer	0.0648159	-0.169213	0.300538	0.947491	Employment history	Sociodemographics	22601#34113147	Sociodemographics	0.179414	0.289687	0.0633905	0.509128
Job coding: window cleaner	0.115592	-0.300815	0.536971	0.947491	Employment history	Sociodemographics	22601#92312988	Sociodemographics	0.89231	0.123852	-0.294998	0.523357
Job code - historical: Window cleaners	0.115592	-0.300815	0.536971	0.947491	Employment history	Sociodemographics	22617#9231	Sociodemographics	0.89231	0.123852	-0.294998	0.523357
Job coding: town planner, development officer	-0.0371911	-0.172242	0.0984947	0.947491	Employment history	Sociodemographics	22601#24323289	Sociodemographics	0.918594	0.0353151	-0.100324	0.169093
Job code - historical: Town planners	-0.0371911	-0.172242	0.0984947	0.947491	Employment history	Sociodemographics	22617#2432	Sociodemographics	0.918594	0.0353151	-0.100324	0.169093
Job code - historical: Pest control officers	0.100242	-0.262957	0.467104	0.947491	Employment history	Sociodemographics	22617#6292	Sociodemographics	0.991817	-0.0117373	-0.382105	0.346224
Frequency of travelling from home to job workplace	-0.00254394	-0.0118459	0.00675802	0.947491	Employment	Sociodemographics	777	Sociodemographics	0.479243	-0.00855465	-0.0178547	0.00074538
Job coding: storesman, warehouseman, porter	0.109474	-0.289841	0.513175	0.947491	Employment history	Sociodemographics	22601#91492769	Sociodemographics	0.995302	-0.00517748	-0.412161	0.38687
Job code - historical: Houseparents and residential wardens	0.0219338	-0.0584964	0.102579	0.947491	Employment history	Sociodemographics	22617#6114	Sociodemographics	0.764777	0.0431797	-0.0372317	0.122943
Transport type for commuting to job workplace	-0.0200575	-0.0940498	0.0541295	0.947491	Employment	Sociodemographics	6143#100	Sociodemographics	0.912413	0.0202409	-0.0540154	0.0939747
Job coding: careers adviser or vocational guidance specialist, placement advisor	-0.077938	-0.364367	0.211474	0.947491	Employment history	Sociodemographics	22601#35643248	Sociodemographics	0.986741	-0.0188074	-0.36601	0.317523
Particulate matter air pollution (pm10); 2007	-0.00092162	-0.00433905	0.00249581	0.947491	Residential air pollution	Sociodemographics	24019	Sociodemographics	0.994236	-5.36893e-05	-0.00346957	0.00336219
Job coding: farmhand, farm labourer, herdsman, shepherd, dairyman, pigman	0.0282661	-0.0764355	0.133333	0.947491	Employment history	Sociodemographics	22601#91112478	Sociodemographics	0.961543	-0.0153541	-0.120837	0.0890732
Job code - historical: Farm workers	0.0282661	-0.0764355	0.133333	0.947491	Employment history	Sociodemographics	22617#9111	Sociodemographics	0.961543	-0.0153541	-0.120837	0.0890732
Job code - historical: Estimators, valuers and assessors	0.025375	-0.0692343	0.120284	0.947491	Employment history	Sociodemographics	22617#3531	Sociodemographics	0.927938	0.0233393	-0.0711591	0.116946
Job code - historical: Probation officers	0.0349649	-0.0953653	0.165847	0.947491	Employment history	Sociodemographics	22617#2443	Sociodemographics	0.991238	-0.00482421	-0.135924	0.124606
Job coding: routine inspector, tester	0.132089	-0.357935	0.628773	0.947491	Employment history	Sociodemographics	22601#81332735	Sociodemographics	0.993648	-0.00484402	-0.266026	0.249885
Mixture of day and night shifts worked: Shift pattern was worked for whole of job	-0.00530418	-0.0251439	0.0145446	0.947491	Employment history	Sociodemographics	22640#1	Sociodemographics	0.803947	-0.00970946	-0.0296093	0.0101619
Job coding: labourer in foundry	0.108667	-0.297643	0.519543	0.947491	Employment history	Sociodemographics	22601#91312844	Sociodemographics	0.835144	0.176817	-0.230277	0.564242
Job code - historical: Labourers in foundries	0.108667	-0.297643	0.519543	0.947491	Employment history	Sociodemographics	22617#9131	Sociodemographics	0.835144	0.176817	-0.230277	0.564242
Job coding: other sales occupations including bill poster, ticket checker	-0.0430419	-0.204729	0.119605	0.947491	Employment history	Sociodemographics	22601#92593346	Sociodemographics	0.964461	0.0203041	-0.143175	0.181165
Job coding: school librarian, assistant school librarian	-0.0622926	-0.296463	0.173946	0.947491	Employment history	Sociodemographics	22601#24513418	Sociodemographics	0.891998	-0.0728376	-0.313656	0.162934
Job coding: market research interviewer, telephone interviewer	-0.0558632	-0.266111	0.15615	0.947491	Employment history	Sociodemographics	22601#41373244	Sociodemographics	0.955494	0.0359043	-0.176949	0.244198
Job code - historical: Market research interviewers	-0.0558632	-0.266111	0.15615	0.947491	Employment history	Sociodemographics	22617#4137	Sociodemographics	0.955494	0.0359043	-0.176949	0.244198
Job coding: sheet metal worker, panel beater, metal finisher, coppersmith	0.0458301	-0.127047	0.219676	0.947491	Employment history	Sociodemographics	22601#52132923	Sociodemographics	0.703184	0.105224	-0.0664311	0.273712
Job code - historical: Sheet metal workers	0.0458301	-0.127047	0.219676	0.947491	Employment history	Sociodemographics	22617#5213	Sociodemographics	0.703184	0.105224	-0.0664311	0.273712
Age of primiparous women at birth of child	-0.00332946	-0.0159286	0.00926967	0.947491	Female-specific factors	Sociodemographics	3872	Sociodemographics	0.751339	-0.00699425	-0.0195188	0.00553029
Job coding: interior designer	-0.083544	-0.398034	0.234658	0.947491	Employment history	Sociodemographics	22601#34223152	Sociodemographics	0.942436	-0.0635027	-0.389356	0.253445
Job coding: paramedic, ambulance paramedic	0.0681458	-0.189813	0.328091	0.948933	Employment history	Sociodemographics	22601#32133075	Sociodemographics	0.828513	-0.119848	-0.384326	0.139076
Job coding: electrical/electronic engineer (including radar, alarm, signal tester)	-0.161022	-0.76932	0.460922	0.951184	Employment history	Sociodemographics	22601#52492665	Sociodemographics	0.971245	-0.0697161	-0.711913	0.538619
Job code - historical: Protective service associate professionals n.e.c.	0.0469815	-0.133232	0.228222	0.951562	Employment history	Sociodemographics	22617#3319	Sociodemographics	0.798621	0.0877851	-0.0920576	0.264193
Breathing problems improved/stopped away from workplace or on holiday: Yes	-0.0106214	-0.0515241	0.0303341	0.951677	Employment history	Sociodemographics	22618#1	Sociodemographics	0.979775	0.00353924	-0.0375144	0.0444395
Job coding: healthcare practice manager, dental practice manager, chiropody practice manager/owner	0.0391388	-0.111772	0.190771	0.952168	Employment history	Sociodemographics	22601#11833099	Sociodemographics	0.999406	-0.000125011	-0.152436	0.14996
Job code - historical: Healthcare practice managers	0.0391388	-0.111772	0.190771	0.952168	Employment history	Sociodemographics	22617#1183	Sociodemographics	0.999406	-0.000125011	-0.152436	0.14996
Job coding: psychologist, psychometrist	0.0333574	-0.0956395	0.1629	0.952168	Employment history	Sociodemographics	22601#22123067	Sociodemographics	0.661643	0.0863158	-0.0420928	0.212985
Job code - historical: Psychologists	0.0333574	-0.0956395	0.1629	0.952168	Employment history	Sociodemographics	22617#2212	Sociodemographics	0.661643	0.0863158	-0.0420928	0.212985
Job code - historical: Veterinarians	0.0528238	-0.151592	0.258557	0.952168	Employment history	Sociodemographics	22617#2216	Sociodemographics	0.928275	-0.049239	-0.256912	0.154666
Job code - historical: Travel and tour guides	0.0399147	-0.115446	0.19602	0.953073	Employment history	Sociodemographics	22617#6213	Sociodemographics	0.857773	-0.0600172	-0.218235	0.0960191
Job coding: wig maker	0.0840876	-0.242495	0.414268	0.953073	Employment history	Sociodemographics	22601#54992961	Sociodemographics	0.562708	0.2474	-0.0731014	0.554775
Job coding: thermal insulation engineer, lagger	0.115547	-0.334452	0.571385	0.953073	Employment history	Sociodemographics	22601#81492544	Sociodemographics	0.892783	-0.138485	-0.605609	0.312596
Workplace had a lot of diesel exhaust: Rarely/never	0.0089854	-0.0263543	0.0442883	0.953073	Employment history	Sociodemographics	22615#0	Sociodemographics	0.971245	0.00394324	-0.03129	0.0392862
Worked with materials containing asbestos	-0.0148638	-0.073369	0.0437501	0.953073	Employment history	Sociodemographics	22612#2	Sociodemographics	0.9753	0.00591538	-0.0526468	0.064151
Job code - historical: Routine laboratory testers	-0.0344916	-0.170265	0.101929	0.953073	Employment history	Sociodemographics	22617#8138	Sociodemographics	0.871046	0.0482686	-0.0877108	0.182351
Job coding: telephonist, telephone/switchboard operator	-0.019828	-0.0980549	0.0586063	0.953073	Employment history	Sociodemographics	22601#41413308	Sociodemographics	0.481466	-0.0725319	-0.151998	0.00637557
Job coding: roofer, roof tiler, slater, felt roofer, thatcher	0.0627101	-0.18433	0.311643	0.953073	Employment history	Sociodemographics	22601#53132526	Sociodemographics	0.845863	0.100078	-0.146403	0.339997
Job code - historical: Roofers, roof tilers and slaters	0.0627101	-0.18433	0.311643	0.953073	Employment history	Sociodemographics	22617#5313	Sociodemographics	0.845863	0.100078	-0.146403	0.339997
Transport type for commuting to job workplace: Car/motor vehicle	0.00299782	-0.00890263	0.0148953	0.953073	Employment	Sociodemographics	6143#1	Sociodemographics	0.922433	0.003069	-0.00883144	0.0149777
How are people in household related to participant: Other related	-0.0118141	-0.0586981	0.0351424	0.953073	Household	Sociodemographics	6141#7	Sociodemographics	0.904472	0.0133821	-0.0335888	0.0601392
Job coding: pipe fitter	0.0878049	-0.258763	0.438472	0.953073	Employment history	Sociodemographics	22601#52162530	Sociodemographics	0.961543	0.0518834	-0.297021	0.387942
Job coding: security service manager/owner, detective agency manager/owner	0.0550379	-0.162875	0.274448	0.953073	Employment history	Sociodemographics	22601#11743454	Sociodemographics	0.840341	0.0918702	-0.125138	0.303958
Job code - historical: Security managers	0.0550379	-0.162875	0.274448	0.953073	Employment history	Sociodemographics	22617#1174	Sociodemographics	0.840341	0.0918702	-0.125138	0.303958
Length of working week for main job	0.00104223	-0.00310761	0.00519207	0.953073	Employment	Sociodemographics	767	Sociodemographics	0.845863	-0.00172848	-0.00587784	0.00242088
Job code - historical: Sports coaches, instructors and officials	0.0329497	-0.0979788	0.164425	0.953073	Employment history	Sociodemographics	22617#3442	Sociodemographics	0.981033	0.0102026	-0.121743	0.140513
Job coding: careers adviser or vocational guidance specialist, placement advisor	0.081872	-0.243237	0.410195	0.953073	Employment history	Sociodemographics	22601#35643275	Sociodemographics	0.986741	-0.0188074	-0.36601	0.317523
Job coding: postal worker, postman, mail sorter, messenger, courier, mailroom clerk, post sorter, leaflet/circular distributor, newspaper/parcel deliverer	0.026348	-0.0791574	0.132227	0.953073	Employment history	Sociodemographics	22601#92113311	Sociodemographics	0.835401	-0.046168	-0.152797	0.0594272
Job coding: river/water surveyor, surveyor and estimator, topographer, property surveyor	-0.0438501	-0.219656	0.132953	0.953073	Employment history	Sociodemographics	22601#24342600	Sociodemographics	0.668084	-0.118128	-0.2985	0.0595861
Job coding: retail/shop cashier, check-out operator, petrol station attendant, restaurant cashier	0.0172539	-0.0521602	0.0868259	0.953073	Employment history	Sociodemographics	22601#71123329	Sociodemographics	0.890331	-0.0215967	-0.0916442	0.0480021
Workplace very hot: Rarely/never	0.00388635	-0.0117955	0.0195644	0.953073	Employment history	Sociodemographics	22608#0	Sociodemographics	0.344095	-0.0166837	-0.0323445	-0.00101248
Job code - historical: Paramedics	0.0525256	-0.160308	0.2668	0.953073	Employment history	Sociodemographics	22617#3213	Sociodemographics	0.880498	0.0708087	-0.142462	0.279399
Job coding: screen printer, block printer	-0.0790923	-0.398781	0.244408	0.953073	Employment history	Sociodemographics	22601#54242889	Sociodemographics	0.879837	-0.110784	-0.44361	0.212773
Job code - historical: Screen printers	-0.0790923	-0.398781	0.244408	0.953073	Employment history	Sociodemographics	22617#5424	Sociodemographics	0.879837	-0.110784	-0.44361	0.212773
Job code - historical: Call centre agents/operators	-0.01845	-0.0936518	0.0569422	0.953073	Employment history	Sociodemographics	22617#7211	Sociodemographics	0.979491	-0.00663155	-0.0825418	0.0687397
Job coding: plant maintenance fitter, machine fitter, mechanic-fitter	-0.0335543	-0.170248	0.103795	0.953073	Employment history	Sociodemographics	22601#52232856	Sociodemographics	0.698524	-0.086837	-0.226101	0.0507093
Job code - historical: Credit controllers	0.0251018	-0.0775376	0.128087	0.953073	Employment history	Sociodemographics	22617#4121	Sociodemographics	0.663473	-0.069493	-0.173773	0.033845
Job coding: pest control officer, mole catcher, rodent operator	0.123022	-0.381404	0.633585	0.953759	Employment history	Sociodemographics	22601#62923014	Sociodemographics	0.922433	0.128291	-0.380126	0.610857
Job coding: ward clerk, medical records clerk	-0.0322904	-0.165726	0.101774	0.953963	Employment history	Sociodemographics	22601#41313093	Sociodemographics	0.984157	0.00821927	-0.126708	0.141376
Job coding: inspector of factories or utilities, gas/electricity installation inspector, plumbing inspector	-0.070532	-0.361056	0.223156	0.953963	Employment history	Sociodemographics	22601#35653462	Sociodemographics	0.936035	0.0614593	-0.23308	0.347158
Job coding: stock control clerk, stock controller, progress/production/stock chaser, warehouse clerk, materials controller/co-ordinator, stores officer	0.0283723	-0.0892253	0.146422	0.954117	Employment history	Sociodemographics	22601#41333350	Sociodemographics	0.961543	0.0177283	-0.100515	0.134626
Job code - historical: Stock control clerks	0.0283723	-0.0892253	0.146422	0.954117	Employment history	Sociodemographics	22617#4133	Sociodemographics	0.961543	0.0177283	-0.100515	0.134626
Job coding: bingo assistant/caller	0.0960079	-0.301125	0.497781	0.954279	Employment history	Sociodemographics	22601#92293192	Sociodemographics	0.719309	-0.246399	-0.658903	0.155224
Job coding: factory cleaner/industrial cleaner in the production of food, drink or tobacco	-0.120591	-0.618441	0.388708	0.954941	Employment history	Sociodemographics	22601#91322968	Sociodemographics	0.883229	-0.170764	-0.700474	0.336938
Domestic garden percentage, buffer 300m	-0.000858102	-0.00446465	0.00274845	0.956644	Greenspace and coastal proximity	Sociodemographics	24504	Sociodemographics	0.850159	-0.00143929	-0.00504329	0.0021647
Job code - historical: Production and process engineers	0.022575	-0.0727607	0.118211	0.957829	Employment history	Sociodemographics	22617#2127	Sociodemographics	0.95683	0.0156258	-0.0797122	0.110071
Job coding: bank manager, bank section manager, building society manager, post/sub-post office manager	0.0132517	-0.0427934	0.0693991	0.957829	Employment history	Sociodemographics	22601#11513250	Sociodemographics	0.953606	-0.0100696	-0.0663763	0.0459431
Job code - historical: Financial institution managers	0.0132517	-0.0427934	0.0693991	0.957829	Employment history	Sociodemographics	22617#1151	Sociodemographics	0.953606	-0.0100696	-0.0663763	0.0459431
Job coding: medical secretary	-0.038808	-0.203064	0.126414	0.957853	Employment history	Sociodemographics	22601#42113094	Sociodemographics	0.719309	-0.101685	-0.270572	0.0648417
Job coding: engineering technician, engineer's assistant, commissioning engineer, contracts engineer, technician engineer, industrial radiographer	-0.0157643	-0.0831042	0.0517227	0.958569	Employment history	Sociodemographics	22601#31133050	Sociodemographics	0.971245	-0.00739559	-0.0749643	0.0597409
Job coding: jewellery maker	-0.107497	-0.56476	0.357277	0.958569	Employment history	Sociodemographics	22601#54952915	Sociodemographics	0.95683	-0.0767176	-0.55525	0.382107
Job coding: air transport/traffic manager, haulage contractor/manager, airport director/manager, shipping manager	0.066847	-0.218731	0.354945	0.958569	Employment history	Sociodemographics	22601#11612673	Sociodemographics	0.949789	0.0532737	-0.234344	0.332806
Job coding: other assembler, routine operative	-0.0458918	-0.24276	0.152354	0.959216	Employment history	Sociodemographics	22601#81392781	Sociodemographics	0.993398	-0.00495763	-0.218935	0.204722
Job coding: caretaker, janitor, concierge, warden	-0.0411135	-0.218612	0.137514	0.960937	Employment history	Sociodemographics	22601#62322997	Sociodemographics	0.658915	-0.123543	-0.30589	0.0561114
Menstruating today	-0.00585797	-0.0312371	0.0195318	0.960937	Female-specific factors	Sociodemographics	3720	Sociodemographics	0.984157	0.00152552	-0.0238988	0.0269068
Job coding: other assembler, routine operative	0.0427524	-0.141997	0.228631	0.960937	Employment history	Sociodemographics	22601#81392812	Sociodemographics	0.993398	-0.00495763	-0.218935	0.204722
Job coding: health and safety officer, occupational hygienist, safety adviser, road safety officer	0.0432646	-0.143773	0.231398	0.960937	Employment history	Sociodemographics	22601#35673467	Sociodemographics	0.848684	0.0749023	-0.111906	0.258126
Job coding: other assembler, routine operative	-0.135664	-0.71801	0.462107	0.960937	Employment history	Sociodemographics	22601#81392791	Sociodemographics	0.993398	-0.00495763	-0.218935	0.204722
Job coding: vocational or industrial trainer/instructor, craft instructor, apprentice instructor	-0.0550675	-0.294813	0.186807	0.960937	Employment history	Sociodemographics	22601#35632698	Sociodemographics	0.885666	0.0395571	-0.085137	0.162645
Job coding: financial controller, accounting/audit technician, trust officer	0.0120309	-0.0408043	0.0649577	0.960937	Employment history	Sociodemographics	22601#35373270	Sociodemographics	0.617889	-0.0386834	-0.0919995	0.0143762
Job code - historical: Financial and accounting technicians	0.0120309	-0.0408043	0.0649577	0.960937	Employment history	Sociodemographics	22617#3537	Sociodemographics	0.617889	-0.0386834	-0.0919995	0.0143762
Job coding: production and process engineer	0.0249405	-0.0845899	0.134869	0.960937	Employment history	Sociodemographics	22601#21273045	Sociodemographics	0.993398	0.00320603	-0.10656	0.111791
Job coding: chartered surveyor, building surveyor, land surveyor	0.0258307	-0.0879798	0.140063	0.961181	Employment history	Sociodemographics	22601#24342599	Sociodemographics	0.964461	0.0141805	-0.100129	0.12723
Job coding: ticket seller	-0.139013	-0.747205	0.483432	0.961181	Employment history	Sociodemographics	22601#41233145	Sociodemographics	0.764777	-0.348617	-1.00496	0.282873
Job coding: management consultant, actuary, economist, statistician, statistical controller/assistant, business analyst, demographer, economic forecaster	0.0153478	-0.0531361	0.0839834	0.961246	Employment history	Sociodemographics	22601#24233283	Sociodemographics	0.934744	0.0146674	-0.0540282	0.0829212
Job coding: demolisher	-0.0930823	-0.508816	0.328354	0.961246	Employment history	Sociodemographics	22601#81492537	Sociodemographics	0.981033	0.0321327	-0.394141	0.441343
Job coding: purchasing manager/director (not retail), supplies manager	0.0281844	-0.0986031	0.15549	0.961246	Employment history	Sociodemographics	22601#11333223	Sociodemographics	0.734978	0.073079	-0.0530611	0.197549
Job code - historical: Purchasing managers	0.0281844	-0.0986031	0.15549	0.961246	Employment history	Sociodemographics	22617#1133	Sociodemographics	0.734978	0.073079	-0.0530611	0.197549
Particulate matter air pollution (pm2.5) absorbance; 2010	-0.000779956	-0.00430048	0.00274056	0.961246	Residential air pollution	Sociodemographics	24007	Sociodemographics	0.92636	0.000881932	-0.00263605	0.00439991
Job coding: nursery nurse/assistant/supervisor, cr`eche assistant	-0.0248605	-0.136974	0.0876838	0.961246	Employment history	Sociodemographics	22601#61213416	Sociodemographics	0.764777	0.0601421	-0.0524233	0.171427
Job code - historical: Nursery nurses	-0.0248605	-0.136974	0.0876838	0.961246	Employment history	Sociodemographics	22617#6121	Sociodemographics	0.764777	0.0601421	-0.0524233	0.171427
Job coding: quality assurance technician/co-ordinator	0.0293601	-0.103067	0.162354	0.961246	Employment history	Sociodemographics	22601#31152695	Sociodemographics	0.993407	0.00284981	-0.130197	0.134171
Job coding: storesman, warehouseman, porter	-0.0978832	-0.536805	0.349282	0.96142	Employment history	Sociodemographics	22601#91492748	Sociodemographics	0.995302	-0.00517748	-0.412161	0.38687
Job coding: routine inspector, tester	-0.0627225	-0.346419	0.223732	0.961828	Employment history	Sociodemographics	22601#81332807	Sociodemographics	0.993648	-0.00484402	-0.266026	0.249885
Job coding: physicist, astronomer, geologist, geophysicist, meteorologist, oceanographer, seismologist	-0.0187271	-0.104493	0.067284	0.962442	Employment history	Sociodemographics	22601#21133023	Sociodemographics	0.857773	-0.0329445	-0.119449	0.0528657
Gap coding: Unable to work due to sickness or disability	0.0100776	-0.0363795	0.0566023	0.962797	Employment history	Sociodemographics	22660#106	Sociodemographics	0.481365	0.0424812	-0.00394037	0.0886974
Job code - historical: Bakers, flour confectioners	0.0326649	-0.117809	0.183902	0.962797	Employment history	Sociodemographics	22617#5432	Sociodemographics	0.937491	0.0314431	-0.119672	0.180257
Job coding: wardrobe mistress or master, dresser	0.100505	-0.360714	0.567807	0.962797	Employment history	Sociodemographics	22601#62113181	Sociodemographics	0.993398	0.0108892	-0.463193	0.465312
Job coding: train driver	0.0799371	-0.287787	0.45263	0.962797	Employment history	Sociodemographics	22601#35142624	Sociodemographics	0.779714	0.187021	-0.180982	0.540225
Job code - historical: Train drivers	0.0799371	-0.287787	0.45263	0.962797	Employment history	Sociodemographics	22617#3514	Sociodemographics	0.779714	0.187021	-0.180982	0.540225
Job coding: spa/leisure attendant	-0.10872	-0.607621	0.399196	0.962797	Employment history	Sociodemographics	22601#62113364	Sociodemographics	0.703184	0.302358	-0.201106	0.773665
Job coding: other general office clerical tasks including: office junior, office worker, photocopy/print room operator, office machinist	0.00768374	-0.0281008	0.0435092	0.962797	Employment history	Sociodemographics	22601#92193312	Sociodemographics	0.668084	0.0235526	-0.0121878	0.0591784
Job code - historical: Elementary office occupations n.e.c.	0.00768374	-0.0281008	0.0435092	0.962797	Employment history	Sociodemographics	22617#9219	Sociodemographics	0.668084	0.0235526	-0.0121878	0.0591784
Job coding: natural environment and conservation manager, country park manager, national park manager	0.0602517	-0.220089	0.343054	0.962797	Employment history	Sociodemographics	22601#12122493	Sociodemographics	0.953606	-0.0517271	-0.337542	0.227001
Job code - historical: Natural environment and conservation managers	0.0602517	-0.220089	0.343054	0.962797	Employment history	Sociodemographics	22617#1212	Sociodemographics	0.953606	-0.0517271	-0.337542	0.227001
Job coding: baker, confectioner, pastry cook, cake decorator	0.0339214	-0.124731	0.19341	0.963515	Employment history	Sociodemographics	22601#54322893	Sociodemographics	0.835144	0.0698674	-0.088602	0.225695
Job coding: manager in construction, clerk of works, site manager, contracts manager, highways manager	0.0137387	-0.0511506	0.0787627	0.964044	Employment history	Sociodemographics	22601#11222591	Sociodemographics	0.979775	-0.00539499	-0.0703967	0.0592106
Job code - historical: Managers in construction	0.0137387	-0.0511506	0.0787627	0.964044	Employment history	Sociodemographics	22617#1122	Sociodemographics	0.979775	-0.00539499	-0.0703967	0.0592106
Job coding: pharmacy manager, hospital pharmacy manager	-0.114371	-0.651023	0.431954	0.964044	Employment history	Sociodemographics	22601#11823098	Sociodemographics	0.900554	-0.164107	-0.73679	0.386483
Job code - historical: Pharmacy managers	-0.114371	-0.651023	0.431954	0.964044	Employment history	Sociodemographics	22617#1182	Sociodemographics	0.900554	-0.164107	-0.73679	0.386483
Job code - historical: Labourers in other construction trades n.e.c.	-0.0459237	-0.263584	0.173617	0.964044	Employment history	Sociodemographics	22617#9129	Sociodemographics	0.842844	-0.0945736	-0.318919	0.125598
Job coding: houseparent, child careworker, residential warden, sheltered accommodation warden, foster parent	0.0169087	-0.0636337	0.097667	0.964044	Employment history	Sociodemographics	22601#61143103	Sociodemographics	0.812712	0.0381747	-0.0424286	0.118131
Age when periods started (menarche)	-0.00181424	-0.0105862	0.00695769	0.964458	Female-specific factors	Sociodemographics	2714	Sociodemographics	0.0260163	0.0150351	0.00625968	0.0238105
Job involves mainly walking or standing	-0.00169711	-0.0099042	0.00650997	0.964458	Employment	Sociodemographics	806	Sociodemographics	0.618653	0.00595035	-0.00226483	0.0141655
Job involves night shift work	0.00442965	-0.0171072	0.0259665	0.964693	Employment	Sociodemographics	3426	Sociodemographics	0.999406	-4.80177e-05	-0.0217117	0.0216156
Job coding: graphic designer, commercial artist, desktop publishing artist, illuminator	-0.0238351	-0.139713	0.0925043	0.964693	Employment history	Sociodemographics	22601#34213150	Sociodemographics	0.719309	0.0694202	-0.0466223	0.18409
Job code - historical: Graphic designers	-0.0238351	-0.139713	0.0925043	0.964693	Employment history	Sociodemographics	22617#3421	Sociodemographics	0.719309	0.0694202	-0.0466223	0.18409
Job coding: distribution clerk/controller, shipping clerk/controller, fleet controller/administrator, aircraft load controller/clerk, traffic officer (airlines, port, road haulage)	-0.0414253	-0.243799	0.162346	0.965479	Employment history	Sociodemographics	22601#41343351	Sociodemographics	0.97024	0.0229916	-0.18192	0.223832
Job coding: packer, wrapper, foreman	0.103396	-0.400098	0.615031	0.96564	Employment history	Sociodemographics	22601#91342765	Sociodemographics	0.963162	-0.0332537	-0.271807	0.200135
Job coding: communication/telecommunications operator, radio/telex operator, radar operator	0.029391	-0.117106	0.176576	0.96564	Employment history	Sociodemographics	22601#41423309	Sociodemographics	0.941361	-0.0297758	-0.178262	0.116682
Job coding: other assembler, routine operative	0.0928847	-0.368407	0.560608	0.96564	Employment history	Sociodemographics	22601#81392760	Sociodemographics	0.993398	-0.00495763	-0.218935	0.204722
Job coding: weigher, grader, sorter, picker; weighbridge clerk/controller	-0.0727076	-0.434416	0.293754	0.96564	Employment history	Sociodemographics	22601#81342828	Sociodemographics	0.986741	-0.0306732	-0.592333	0.501866
Job coding: other security worker including court bailiff or usher, museum attendant	-0.0615852	-0.368391	0.248845	0.96564	Employment history	Sociodemographics	22601#92493459	Sociodemographics	0.845863	-0.132746	-0.451583	0.17822
Job code - historical: TV, video and audio engineers	-0.0259438	-0.15599	0.104687	0.96564	Employment history	Sociodemographics	22617#5244	Sociodemographics	0.812712	0.0614634	-0.0683951	0.189573
Job coding: aircraft pilot, flight engineer, aircraft navigator, helicopter pilot	0.039417	-0.158191	0.23825	0.96564	Employment history	Sociodemographics	22601#35122636	Sociodemographics	0.993398	0.00489892	-0.193852	0.199702
Job coding: sports assistant, lifeguard, swimming pool attendant, gym attendant, bowling green attendant	-0.0453625	-0.272682	0.183892	0.96564	Employment history	Sociodemographics	22601#62113142	Sociodemographics	0.953781	-0.0412459	-0.274721	0.187548
Job coding: other engineering professional	-0.0598229	-0.359847	0.243446	0.966084	Employment history	Sociodemographics	22601#21292686	Sociodemographics	0.9753	0.00819095	-0.0728436	0.0885963
Job coding: personnel or industrial relations officer, recruitment consultant	-0.0268919	-0.164732	0.111589	0.967088	Employment history	Sociodemographics	22601#35623207	Sociodemographics	0.981033	0.0151538	-0.182485	0.209
Job coding: senior prison officer including governor, chief, controller, principal superintendent	-0.056512	-0.346328	0.236335	0.967088	Employment history	Sociodemographics	22601#11733447	Sociodemographics	0.904561	0.0816463	-0.210781	0.365132
Job coding: routine inspector, tester	0.0500262	-0.2074	0.309605	0.967088	Employment history	Sociodemographics	22601#81332715	Sociodemographics	0.993648	-0.00484402	-0.266026	0.249885
Worked with materials containing asbestos: Rarely/never	0.00737807	-0.0308147	0.045526	0.967088	Employment history	Sociodemographics	22612#0	Sociodemographics	0.859696	0.0143039	-0.0237495	0.0524878
Job coding: factory cleaner/industrial cleaner in the production of chemicals or petrochemicals	0.100715	-0.417596	0.626768	0.967088	Employment history	Sociodemographics	22601#91322974	Sociodemographics	0.668084	0.328519	-0.182326	0.80745
Job coding: musician, bandsman, instrumentalist, bellringer; composer, conductor; song writer	0.0306683	-0.129435	0.191592	0.967088	Employment history	Sociodemographics	22601#34153170	Sociodemographics	0.930509	0.036183	-0.124519	0.194328
Job code - historical: Musicians	0.0306683	-0.129435	0.191592	0.967088	Employment history	Sociodemographics	22617#3415	Sociodemographics	0.930509	0.036183	-0.124519	0.194328
Job coding: garage manager/proprietor	-0.0415964	-0.258853	0.177324	0.967088	Employment history	Sociodemographics	22601#12322938	Sociodemographics	0.848684	-0.132847	-0.464768	0.189867
Job coding: quality assurance technician or co-ordinator	-0.0362526	-0.226051	0.154806	0.967088	Employment history	Sociodemographics	22601#31153052	Sociodemographics	0.961543	-0.0292323	-0.222118	0.160142
Gap coding: Full-time or part-time education	0.00380066	-0.0161861	0.0237972	0.967088	Employment history	Sociodemographics	22660#103	Sociodemographics	0.927938	-0.00493714	-0.0249692	0.0150662
Worked with paints, thinners or glues	0.00658808	-0.0280616	0.0412756	0.967088	Employment history	Sociodemographics	22613#2	Sociodemographics	0.280194	0.022107	0.00291191	0.0412816
Job code - historical: Nurses	0.00577309	-0.0246134	0.0361863	0.967088	Employment history	Sociodemographics	22617#3211	Sociodemographics	0.845863	0.0126018	-0.0178399	0.0429699
Job code - historical: Farm managers	-0.0292959	-0.185603	0.127837	0.969338	Employment history	Sociodemographics	22617#1211	Sociodemographics	0.569092	-0.124538	-0.284963	0.0337528
Job coding: civilian fingerprint officer	0.0864372	-0.376511	0.554917	0.970845	Employment history	Sociodemographics	22601#41313443	Sociodemographics	0.885666	0.145229	-0.319374	0.586298
Job coding: health visitor	0.0188178	-0.0829582	0.120954	0.970918	Employment history	Sociodemographics	22601#32113077	Sociodemographics	0.953606	0.0187473	-0.083459	0.119926
Job coding: railway signal technician, domestic appliance repairer	-0.0846282	-0.540627	0.379379	0.970918	Employment history	Sociodemographics	22601#52493054	Sociodemographics	0.513076	0.372386	-0.0746019	0.794972
Job code - historical: Elementary personal services occupations n.e.c.	-0.0357014	-0.229487	0.15938	0.970918	Employment history	Sociodemographics	22617#9229	Sociodemographics	0.875786	-0.0692787	-0.267655	0.12571
Job coding: garage manager/proprietor	0.0591423	-0.263037	0.384489	0.970918	Employment history	Sociodemographics	22601#12323327	Sociodemographics	0.848684	-0.132847	-0.464768	0.189867
Job coding: butcher, meat cutter, slaughterer	-0.041948	-0.270788	0.188865	0.970918	Employment history	Sociodemographics	22601#54312892	Sociodemographics	0.976686	0.0216996	-0.211264	0.249449
Job code - historical: Butchers, meat cutters	-0.041948	-0.270788	0.188865	0.970918	Employment history	Sociodemographics	22617#5431	Sociodemographics	0.976686	0.0216996	-0.211264	0.249449
Job coding: telecommunication engineer, telephone engineer, telephone technician	-0.0194473	-0.126103	0.0876026	0.970918	Employment history	Sociodemographics	22601#52422945	Sociodemographics	0.976686	-0.0100193	-0.117563	0.0964229
Job code - historical: Telecommunications engineers	-0.0194473	-0.126103	0.0876026	0.970918	Employment history	Sociodemographics	22617#5242	Sociodemographics	0.976686	-0.0100193	-0.117563	0.0964229
Job code - historical: Medical and dental technicians	0.0193382	-0.0873718	0.126431	0.971282	Employment history	Sociodemographics	22617#3218	Sociodemographics	0.825043	0.0492734	-0.0574005	0.154806
Job coding: dispensing optician	0.0695491	-0.314116	0.457991	0.972184	Employment history	Sociodemographics	22601#32163087	Sociodemographics	0.765873	-0.212287	-0.615579	0.178906
Job code - historical: Dispensing opticians	0.0695491	-0.314116	0.457991	0.972184	Employment history	Sociodemographics	22617#3216	Sociodemographics	0.765873	-0.212287	-0.615579	0.178906
Job code - historical: Engineering professionals n.e.c.	-0.0135892	-0.0890227	0.0620316	0.972184	Employment history	Sociodemographics	22617#2129	Sociodemographics	0.886219	-0.024031	-0.100045	0.051448
Job code - historical: Sales related occupations n.e.c.	0.0113143	-0.0517824	0.0745421	0.972904	Employment history	Sociodemographics	22617#7129	Sociodemographics	0.953606	0.0114294	-0.0517613	0.0742394
Job coding: other shop work including: trolley collector, basket issuer, pricer/tagger	-0.049299	-0.324096	0.228277	0.973559	Employment history	Sociodemographics	22601#92593334	Sociodemographics	0.858894	-0.107055	-0.392157	0.171229
Job code - historical: Science and engineering technicians n.e.c.	-0.00808479	-0.0536623	0.0375606	0.973559	Employment history	Sociodemographics	22617#3119	Sociodemographics	0.786603	-0.0233465	-0.0691505	0.0222636
Job coding: sculptor	-0.048388	-0.321058	0.227104	0.973559	Employment history	Sociodemographics	22601#34113149	Sociodemographics	0.89777	0.0801058	-0.195511	0.347671
Breastfed as a baby	-0.00156182	-0.0104294	0.00730464	0.973559	Early life factors	Sociodemographics	1677	Sociodemographics	0.981033	0.000603815	-0.00825875	0.00946947
Job coding: hotel and other accommodation porter, bell hop	-0.0615587	-0.410868	0.291948	0.973559	Employment history	Sociodemographics	22601#92223001	Sociodemographics	0.999406	0.000940538	-0.234767	0.231263
Job coding: senior official in local government including parish or town or county chief clerk, chief or superintendent rate collector, chief executive or director, councillor	-0.0100404	-0.0675768	0.0476065	0.973559	Employment history	Sociodemographics	22601#11133201	Sociodemographics	0.344095	-0.0618108	-0.119989	-0.0039375
Job code - historical: Senior officials in local government	-0.0100404	-0.0675768	0.0476065	0.973559	Employment history	Sociodemographics	22617#1113	Sociodemographics	0.344095	-0.0618108	-0.119989	-0.0039375
Job coding: other science technician, materials technician, technical assistant, technical officer	-0.00935826	-0.0630917	0.0444723	0.973559	Employment history	Sociodemographics	22601#31193034	Sociodemographics	0.82598	-0.0248427	-0.0789111	0.0289525
Job coding: slimming consultant	-0.0874258	-0.585323	0.418769	0.973559	Employment history	Sociodemographics	22601#62223365	Sociodemographics	0.698524	0.300235	-0.193102	0.762072
Job coding: metal making or metal treating process worker, machine operator, furnaceman	-0.0333242	-0.224352	0.158977	0.973559	Employment history	Sociodemographics	22601#81172834	Sociodemographics	0.734978	-0.113137	-0.30906	0.0795805
Job code - historical: Metal making and treating process operatives	-0.0333242	-0.224352	0.158977	0.973559	Employment history	Sociodemographics	22617#8117	Sociodemographics	0.734978	-0.113137	-0.30906	0.0795805
Job code - historical: Assemblers (electrical products)	-0.017808	-0.120459	0.0852018	0.973559	Employment history	Sociodemographics	22617#8131	Sociodemographics	0.649791	-0.0718538	-0.17628	0.0316069
Job coding: personnel or industrial relations officer, recruitment consultant	-0.0414721	-0.280979	0.200194	0.973559	Employment history	Sociodemographics	22601#35623232	Sociodemographics	0.981033	0.0151538	-0.182485	0.209
Job code - historical: Bricklayers, masons	0.0291715	-0.140111	0.199397	0.973559	Employment history	Sociodemographics	22617#5312	Sociodemographics	0.835144	0.0732456	-0.0957447	0.239262
Job coding: other work in this industry: factory hand, mate, assistant, handler, loader	-0.0546947	-0.371751	0.265681	0.973559	Employment history	Sociodemographics	22601#91392751	Sociodemographics	0.993648	-0.00568731	-0.329507	0.308405
Heating type(s) in home: Oil (kerosene) central heating	0.00620266	-0.0299825	0.0424281	0.973559	Household	Sociodemographics	6140#3	Sociodemographics	0.992534	0.001124	-0.0351358	0.0372672
Job coding: sea transport/traffic manager, haulage contractor/manager, harbour/port master, shipping manager	0.0527668	-0.254748	0.363485	0.973559	Employment history	Sociodemographics	22601#11612675	Sociodemographics	0.972658	0.0324889	-0.280166	0.335686
Job code - historical: Sports and leisure assistants	0.0248681	-0.121418	0.171858	0.973559	Employment history	Sociodemographics	22617#6211	Sociodemographics	0.841595	0.0622221	-0.0844893	0.20676
Job coding: other electrical or electronics technician, including alarm engineer, office machinery engineer or mechanic	0.0199451	-0.0980409	0.138392	0.973559	Employment history	Sociodemographics	22601#52493053	Sociodemographics	0.949789	0.0221252	-0.0961898	0.139042
Job coding: ceiling fixer	-0.0986133	-0.677325	0.492402	0.973559	Employment history	Sociodemographics	22601#81492545	Sociodemographics	0.927938	-0.149189	-0.766977	0.438796
Job coding: laundry, laundrette, dry cleaning manager or proprietor/owner	0.0687589	-0.338856	0.481477	0.973559	Employment history	Sociodemographics	22601#12392993	Sociodemographics	0.927938	-0.101842	-0.522537	0.303979
Job coding: chef, cook, caterer	0.0157238	-0.0780058	0.109736	0.973559	Employment history	Sociodemographics	22601#54343385	Sociodemographics	0.912548	0.0254462	-0.0687038	0.118728
Job code - historical: Shopkeepers and wholesale/retail dealers	-0.00881537	-0.0618536	0.0443159	0.973559	Employment history	Sociodemographics	22617#1234	Sociodemographics	0.905919	0.0148147	-0.0382542	0.0676109
Job coding: vocational or industrial trainer/instructor	0.0276407	-0.139053	0.195314	0.973559	Employment history	Sociodemographics	22601#35633208	Sociodemographics	0.964461	0.0189387	-0.135628	0.171171
Job coding: school caretaker, janitor	-0.0569743	-0.399769	0.290305	0.973559	Employment history	Sociodemographics	22601#62323413	Sociodemographics	0.845863	-0.147306	-0.505315	0.200592
Job coding: personnel or industrial relations officer, recruitment consultant	0.0323468	-0.163047	0.228983	0.973559	Employment history	Sociodemographics	22601#35623217	Sociodemographics	0.981033	0.0151538	-0.182485	0.209
Greenspace percentage, buffer 1000m	0.000593253	-0.00300295	0.00418945	0.973559	Greenspace and coastal proximity	Sociodemographics	24500	Sociodemographics	0.839965	-0.00154275	-0.0051364	0.0020509
Home location at assessment - east co-ordinate (rounded)	0.000543924	-0.00276822	0.00385607	0.973559	Reception	Sociodemographics	20074	Sociodemographics	0.587114	0.00253301	-0.000779288	0.00584531
Job coding: other sales-related work including car hirer, skip hire operator, rental operator, sales promoter, film/video renter, money lender	0.0341634	-0.173936	0.243618	0.973559	Employment history	Sociodemographics	22601#71293335	Sociodemographics	0.850159	0.0819305	-0.125829	0.285114
Job coding: entertainer, comedian, acrobat, clown, juggler, performing animal trainer, puppeteer	0.0615754	-0.31388	0.441305	0.973559	Employment history	Sociodemographics	22601#34133167	Sociodemographics	0.971245	0.0412719	-0.342032	0.410381
Worked with paints, thinners or glues: Rarely/never	-0.00514943	-0.0368859	0.0265558	0.973559	Employment history	Sociodemographics	22613#0	Sociodemographics	0.403677	-0.0315504	-0.0630377	2.31122e-05
Job code - historical: Auto electricians	0.0444585	-0.229931	0.321096	0.973559	Employment history	Sociodemographics	22617#5233	Sociodemographics	0.83227	0.121688	-0.15184	0.387249
Job coding: veterinarian	0.0957586	-0.494418	0.695271	0.973559	Employment history	Sociodemographics	22601#22162482	Sociodemographics	0.964461	0.0729956	-0.529757	0.638903
Job coding: printing machine operator, printer's assistant	-0.029997	-0.216409	0.157597	0.973559	Employment history	Sociodemographics	22601#91332890	Sociodemographics	0.714189	0.11251	-0.0732987	0.294539
Job code - historical: Printing machine minders and assistants	-0.029997	-0.216409	0.157597	0.973559	Employment history	Sociodemographics	22617#9133	Sociodemographics	0.714189	0.11251	-0.0732987	0.294539
Job coding: filing clerk, records assistant/clerk	0.0139046	-0.0729278	0.10099	0.973559	Employment history	Sociodemographics	22601#41313272	Sociodemographics	0.993398	-0.00214291	-0.0961968	0.0910685
Job coding: routine laboratory tester	-0.0760582	-0.54749	0.402966	0.973559	Employment history	Sociodemographics	22601#81382746	Sociodemographics	0.981033	-0.0289253	-0.457515	0.382884
Job coding: sports coach, instructor, trainer, or manager	0.0212151	-0.111405	0.154404	0.973559	Employment history	Sociodemographics	22601#34423138	Sociodemographics	0.975504	0.0133291	-0.120364	0.145339
Job coding: cinema/theatre usher, popcorn/ice cream/refreshments seller	0.0737971	-0.385447	0.539892	0.973559	Employment history	Sociodemographics	22601#92263187	Sociodemographics	0.988437	-0.0223418	-0.496563	0.431274
Job coding: shopkeeper, shop owner, newsagent, wholesale/retail dealer	-0.00847104	-0.0616441	0.0447956	0.973559	Employment history	Sociodemographics	22601#12343321	Sociodemographics	0.897679	0.0156597	-0.0375356	0.0685808
Job coding: officer in armed forces	0.0136451	-0.0720888	0.0996223	0.973559	Employment history	Sociodemographics	22601#11713433	Sociodemographics	0.991238	-0.00300394	-0.0890625	0.082342
Job code - historical: Officers in armed forces	0.0136451	-0.0720888	0.0996223	0.973559	Employment history	Sociodemographics	22617#1171	Sociodemographics	0.991238	-0.00300394	-0.0890625	0.082342
Job coding: school examiner	0.0635861	-0.333779	0.465787	0.973559	Employment history	Sociodemographics	22601#23193430	Sociodemographics	0.904561	-0.115404	-0.529101	0.284439
Age started oral contraceptive pill	-0.000667516	-0.00488077	0.00354574	0.973559	Female-specific factors	Sociodemographics	2794	Sociodemographics	0.451739	-0.00400244	-0.00821731	0.000212441
Job code - historical: Senior officers in fire, ambulance, prison and related services	0.020886	-0.111013	0.153363	0.973559	Employment history	Sociodemographics	22617#1173	Sociodemographics	0.965627	-0.0159402	-0.149147	0.115608
Job code - historical: Vehicle spray painters	-0.0425827	-0.3119	0.229614	0.973559	Employment history	Sociodemographics	22617#5234	Sociodemographics	0.98195	-0.0175331	-0.293622	0.251577
Job coding: ticket seller, box office clerk	-0.0482819	-0.355096	0.261911	0.973559	Employment history	Sociodemographics	22601#41233184	Sociodemographics	0.981033	0.0229898	-0.290273	0.327072
Job code - historical: Management consultants, actuaries, economists and statisticians	0.0100019	-0.0538714	0.0740075	0.973559	Employment history	Sociodemographics	22617#2423	Sociodemographics	0.993398	-0.001461	-0.0656546	0.0623525
Job coding: furniture polisher, painter, decorator	0.0764192	-0.411634	0.570686	0.973559	Employment history	Sociodemographics	22601#53232905	Sociodemographics	0.562708	0.36593	-0.108625	0.811819
Job coding: sales room assistant, wine merchant's cellar man; order/stock filler, stock/store keeper; lorry/warehouse loader/checker/weigher, goods porter, customs attendant	0.0225434	-0.123023	0.168809	0.973559	Employment history	Sociodemographics	22601#91493353	Sociodemographics	0.991238	-0.00496507	-0.152065	0.140116
Job coding: theme park or arcade attendant; fairground/funfair worker, snooker hall attendant, or other leisure attendants	-0.0327091	-0.24427	0.180441	0.973559	Employment history	Sociodemographics	22601#92263197	Sociodemographics	0.605123	-0.163232	-0.382564	0.0524557
Job coding: croupier	-0.0565917	-0.422612	0.31401	0.973559	Employment history	Sociodemographics	22601#62113195	Sociodemographics	0.892273	-0.114767	-0.496678	0.255163
Job coding: publican or manager of licensed premises, licensee, wine bar manager	0.0959797	-0.522443	0.726234	0.973559	Employment history	Sociodemographics	22601#12243178	Sociodemographics	0.964461	0.0755169	-0.550925	0.66001
Job coding: shelf filler or stacker, stock handler, display assistant	0.0152877	-0.084507	0.115409	0.973559	Employment history	Sociodemographics	22601#92513331	Sociodemographics	0.668084	-0.0668564	-0.168497	0.0338997
Job code - historical: Shelf fillers	0.0152877	-0.084507	0.115409	0.973559	Employment history	Sociodemographics	22617#9251	Sociodemographics	0.668084	-0.0668564	-0.168497	0.0338997
Job coding: playgroup or playschool leader or assistant	-0.0142685	-0.107767	0.0795311	0.973559	Employment history	Sociodemographics	22601#61233408	Sociodemographics	0.879837	-0.0318246	-0.126492	0.0620236
Job code - historical: Playgroup leaders/assistants	-0.0142685	-0.107767	0.0795311	0.973559	Employment history	Sociodemographics	22617#6123	Sociodemographics	0.879837	-0.0318246	-0.126492	0.0620236
Job coding: veterinarian	0.0867576	-0.478769	0.662179	0.973559	Employment history	Sociodemographics	22601#22162508	Sociodemographics	0.964461	0.0729956	-0.529757	0.638903
Job coding: careers adviser or vocational guidance specialist, placement advisor	-0.0515784	-0.389343	0.290319	0.973559	Employment history	Sociodemographics	22601#35643219	Sociodemographics	0.986741	-0.0188074	-0.36601	0.317523
Job coding: manager of snooker hall, bingo hall, circus/fairground, casino, night club, etc.	0.0607447	-0.338611	0.464705	0.973559	Employment history	Sociodemographics	22601#12253177	Sociodemographics	0.989949	-0.0172654	-0.426088	0.376586
Job coding: factory cleaner/industrial cleaner in the production of vehicles or vehicle components	0.0884231	-0.491986	0.681072	0.973559	Employment history	Sociodemographics	22601#91322978	Sociodemographics	0.959912	0.0917943	-0.508739	0.657801
Job coding: shop fitter, office fitter	0.0696584	-0.389216	0.536482	0.973559	Employment history	Sociodemographics	22601#53152557	Sociodemographics	0.927938	0.111268	-0.353322	0.552909
Job code - historical: Precision instrument makers and repairers	0.033479	-0.188763	0.257224	0.973559	Employment history	Sociodemographics	22617#5224	Sociodemographics	0.734978	-0.131252	-0.358897	0.0921779
Job coding: garage manager/owner	0.0311269	-0.175561	0.239255	0.973559	Employment history	Sociodemographics	22601#12322659	Sociodemographics	0.845863	-0.086566	-0.297424	0.120218
Job coding: journalist, reporter, newspaper correspondent, sports writer, newspaper or magazine editor	-0.0140947	-0.108073	0.0801826	0.973559	Employment history	Sociodemographics	22601#34313159	Sociodemographics	0.987216	0.00481054	-0.0898043	0.098568
Job code - historical: Journalists, newspaper and periodical editors	-0.0140947	-0.108073	0.0801826	0.973559	Employment history	Sociodemographics	22617#3431	Sociodemographics	0.987216	0.00481054	-0.0898043	0.098568
Job coding: personnel or industrial relations officer, recruitment consultant	-0.0156093	-0.119695	0.088852	0.973559	Employment history	Sociodemographics	22601#35623213	Sociodemographics	0.981033	0.0151538	-0.182485	0.209
Job code - historical: Aircraft pilots and flight engineers	0.0286414	-0.162149	0.220592	0.973559	Employment history	Sociodemographics	22617#3512	Sociodemographics	0.981033	-0.0134575	-0.205936	0.175409
Job coding: nuclear power engineer	-0.0757506	-0.577181	0.434605	0.973559	Employment history	Sociodemographics	22601#21292871	Sociodemographics	0.701044	-0.327913	-0.860399	0.188948
Current employment status: Unable to work because of sickness or disability	0.00275664	-0.0156821	0.0212058	0.973559	Employment	Sociodemographics	6142#4	Sociodemographics	0.651248	0.0126545	-0.00578	0.0310587
Job code - historical: Assemblers and routine operatives n.e.c.	0.00865526	-0.04937	0.0667923	0.973559	Employment history	Sociodemographics	22617#8139	Sociodemographics	0.502009	0.0515619	-0.00629677	0.10909
Job coding: civil service senior manager outside the senior civil service (former grades 6 and 7)	-0.00833164	-0.0642678	0.0477067	0.973559	Employment history	Sociodemographics	22601#24413202	Sociodemographics	0.89777	-0.0165107	-0.072791	0.0394773
Job code - historical: Public service administrative professionals	-0.00833164	-0.0642678	0.0477067	0.973559	Employment history	Sociodemographics	22617#2441	Sociodemographics	0.89777	-0.0165107	-0.072791	0.0394773
Job coding: civil service executive officer, revenue/tax executive or officer, fraud inspector or officer, job centre adviser	-0.00526581	-0.0407941	0.0303019	0.973559	Employment history	Sociodemographics	22601#41113204	Sociodemographics	0.905919	-0.00999479	-0.0456794	0.0255759
Job code - historical: Civil Service executive officers	-0.00526581	-0.0407941	0.0303019	0.973559	Employment history	Sociodemographics	22617#4111	Sociodemographics	0.905919	-0.00999479	-0.0456794	0.0255759
Job coding: television or radio engineer, video engineer	-0.0261059	-0.202246	0.151135	0.973559	Employment history	Sociodemographics	22601#52442947	Sociodemographics	0.885819	0.0556638	-0.120955	0.229051
Gap coding: Looking after the home and/or family	0.00270463	-0.015737	0.0211469	0.973559	Employment history	Sociodemographics	22660#105	Sociodemographics	0.941361	0.0037329	-0.0147255	0.022191
Job coding: travel agency manager/owner, tourist manager	0.0226283	-0.132777	0.178867	0.973559	Employment history	Sociodemographics	22601#12263368	Sociodemographics	0.931911	-0.0345723	-0.192371	0.120913
Job code - historical: Travel agency managers	0.0226283	-0.132777	0.178867	0.973559	Employment history	Sociodemographics	22617#1226	Sociodemographics	0.931911	-0.0345723	-0.192371	0.120913
Job code - historical: Product, clothing and related designers	-0.0190242	-0.150368	0.112909	0.973559	Employment history	Sociodemographics	22617#3422	Sociodemographics	0.797535	-0.0661675	-0.200214	0.0663212
Job coding: pest exterminator, pest control surveyor	0.075113	-0.445763	0.604467	0.973559	Employment history	Sociodemographics	22601#62923015	Sociodemographics	0.890964	-0.165758	-0.713848	0.358745
Job coding: mechanical engineer, automobile engineer, aeronautical engineer, locomotive or marine engineer, welding engineer	0.00865684	-0.0520339	0.0694661	0.973559	Employment history	Sociodemographics	22601#21223040	Sociodemographics	0.868357	-0.0219668	-0.0828977	0.0386194
Job coding: machine operator, processor, paint maker, foreman	0.0275832	-0.166062	0.222462	0.973559	Employment history	Sociodemographics	22601#81142763	Sociodemographics	0.954298	0.0340371	-0.160863	0.225195
Job coding: traffic warden, wheel clamper	-0.0869151	-0.69994	0.540362	0.973559	Employment history	Sociodemographics	22601#92422614	Sociodemographics	0.984157	0.0372042	-0.597959	0.634963
Birth weight	0.000620334	-0.00382147	0.00506214	0.973559	Early life factors	Sociodemographics	20022	Sociodemographics	0.885261	0.0014278	-0.00301282	0.00586841
Job coding: quality assurance manager, quality control manager	-0.0281639	-0.229579	0.174666	0.973559	Employment history	Sociodemographics	22601#11413229	Sociodemographics	0.960515	0.0189461	-0.104307	0.140692
Job coding: horticultural manager, vineyard manager	0.03348	-0.205943	0.274771	0.973559	Employment history	Sociodemographics	22601#12112485	Sociodemographics	0.949001	0.0449998	-0.196036	0.280054
Job coding: photographer and audio-visual equipment operator, cameraman, film technician, sound or light engineer, projectionist	-0.0339123	-0.281571	0.215828	0.973559	Employment history	Sociodemographics	22601#34343186	Sociodemographics	0.530767	0.200489	-0.0438482	0.43769
Transport type for commuting to job workplace: Walk	-0.00175705	-0.0146875	0.0111774	0.973559	Employment	Sociodemographics	6143#2	Sociodemographics	0.687458	-0.00829103	-0.0212412	0.00464823
Job coding: waiter, waitress, maitre d'hotel, sommelier, steward	0.0125871	-0.0808523	0.106312	0.973559	Employment history	Sociodemographics	22601#92243389	Sociodemographics	0.981033	-0.00670483	-0.101141	0.086906
Job code - historical: Waiters, waitresses	0.0125871	-0.0808523	0.106312	0.973559	Employment history	Sociodemographics	22617#9224	Sociodemographics	0.981033	-0.00670483	-0.101141	0.086906
Job code - historical: Recycling and refuse disposal managers	-0.0404087	-0.340261	0.262653	0.973559	Employment history	Sociodemographics	22617#1235	Sociodemographics	0.764777	-0.165879	-0.4782	0.139247
Length of menstrual cycle	-0.00302256	-0.0256153	0.0195702	0.973559	Female-specific factors	Sociodemographics	3710	Sociodemographics	0.883229	0.0073917	-0.0151642	0.0299476
Qualifications: O levels/GCSEs or equivalent	0.000929649	-0.00604556	0.00790491	0.973559	Education	Sociodemographics	6138#3	Sociodemographics	0.527993	-0.00582114	-0.0127965	0.00115386
Year job ended	-0.000877849	-0.00748091	0.00572521	0.973559	Employment history	Sociodemographics	22603	Sociodemographics	0.879837	0.00223428	-0.0043631	0.00883166
Job coding: nursery worker/hand, horticultural worker, fruit picker, mushroom picker and other pickers	-0.0226644	-0.192801	0.148507	0.973559	Employment history	Sociodemographics	22601#91192487	Sociodemographics	0.981033	-0.0118868	-0.184681	0.158038
Job coding: precision instrument maker or repairer	0.0340255	-0.221467	0.291462	0.973559	Employment history	Sociodemographics	22601#52242953	Sociodemographics	0.735144	-0.150539	-0.413057	0.106536
Job coding: mechanical engineer	-0.0143361	-0.122444	0.0941647	0.973559	Employment history	Sociodemographics	22601#21222679	Sociodemographics	0.971245	0.0117018	-0.0967266	0.118975
Job coding: electrician, electrical fitter	-0.0313082	-0.267696	0.206973	0.973559	Employment history	Sociodemographics	22601#52412528	Sociodemographics	0.605123	-0.182666	-0.427839	0.0581327
Job coding: builder, building contractor	-0.0238438	-0.204257	0.157714	0.973559	Employment history	Sociodemographics	22601#53192549	Sociodemographics	0.95683	-0.0549991	-0.399213	0.279287
Job coding: plumber	-0.0185866	-0.160679	0.124166	0.973559	Employment history	Sociodemographics	22601#53142539	Sociodemographics	0.89777	-0.0420819	-0.186071	0.0999886
Job coding: childminder, au pair, children's nanny	-0.0127876	-0.110657	0.085387	0.973559	Employment history	Sociodemographics	22601#61223417	Sociodemographics	0.97024	0.0111004	-0.0876367	0.108901
Work hours - lumped category	-0.00179727	-0.0156557	0.0120601	0.973559	Employment history	Sociodemographics	22604#3	Sociodemographics	0.95683	0.00222916	-0.0116273	0.0160883
Job code - historical: Motor mechanics, auto engineers	-0.009614	-0.0836628	0.064612	0.973559	Employment history	Sociodemographics	22617#5231	Sociodemographics	0.910851	0.0203657	-0.0537278	0.0939301
Job coding: potter, ceramic caster, ceramic artist, ceramic lithographer	0.0395915	-0.26728	0.349667	0.973559	Employment history	Sociodemographics	22601#54912900	Sociodemographics	0.768568	-0.165794	-0.482529	0.143466
Job coding: legal secretary, clerk, or aid clerk	0.0126078	-0.0859901	0.111536	0.973559	Employment history	Sociodemographics	22601#42123280	Sociodemographics	0.809626	0.0472197	-0.0513086	0.144767
Mixture of day and night shifts worked: Shift pattern was worked for some (but not all) of job	-0.00290228	-0.0256894	0.0198983	0.973559	Employment history	Sociodemographics	22640#0	Sociodemographics	0.845863	-0.00953093	-0.0323729	0.0132706
Heating type(s) in home: Solid fuel central heating	0.00944337	-0.0646613	0.0837253	0.973559	Household	Sociodemographics	6140#5	Sociodemographics	0.961543	-0.0109398	-0.0854304	0.063046
Job coding: production, works or maintenance manager	-0.0105589	-0.0939815	0.0730933	0.973902	Employment history	Sociodemographics	22601#11212692	Sociodemographics	0.556879	-0.067701	-0.15218	0.0161434
Job coding: auto electrician	-0.0390901	-0.347227	0.272319	0.973902	Employment history	Sociodemographics	22601#52332936	Sociodemographics	0.906991	0.0851763	-0.225434	0.385808
Home location - east co-ordinate (rounded)	0.000407866	-0.00288826	0.00370399	0.975181	Home locations	Sociodemographics	22702	Sociodemographics	0.616984	0.0024203	-0.000875779	0.00571638
Job coding: building site foreman or supervisor	0.0243493	-0.17292	0.222862	0.975442	Employment history	Sociodemographics	22601#81492548	Sociodemographics	0.95683	-0.0319914	-0.231735	0.163997
Job coding: other therapist including acupuncturist, aromatherapist, dietician, herbalist, homeopath, hypnotherapist, masseur, orthoptist, osteopath, psychotherapist	-0.00872282	-0.0798229	0.0625446	0.975757	Employment history	Sociodemographics	22601#32293082	Sociodemographics	0.955494	0.0121186	-0.0593727	0.083127
Traffic intensity on the nearest road	0.00174441	-0.0125952	0.016084	0.976199	Residential air pollution	Sociodemographics	24009	Sociodemographics	0.961543	-0.00210301	-0.0164398	0.0122338
Job coding: education officer, director of education, curriculum development officer	0.00842628	-0.0609647	0.0779785	0.976199	Employment history	Sociodemographics	22601#23133420	Sociodemographics	0.748897	-0.0391733	-0.109196	0.0303991
Job coding: line or cable repairer, cable jointer, overhead linesman	0.033337	-0.240765	0.309809	0.976199	Employment history	Sociodemographics	22601#52432946	Sociodemographics	0.883395	0.0880478	-0.186971	0.355174
Job code - historical: Lines repairers and cable jointers	0.033337	-0.240765	0.309809	0.976199	Employment history	Sociodemographics	22617#5243	Sociodemographics	0.883395	0.0880478	-0.186971	0.355174
Job coding: travel/tour guide	0.0190909	-0.14118	0.180179	0.976199	Employment history	Sociodemographics	22601#62133370	Sociodemographics	0.879837	-0.0552449	-0.218614	0.105774
Job coding: religious building caretaker	0.0623315	-0.457012	0.591359	0.976199	Employment history	Sociodemographics	22601#62322998	Sociodemographics	0.888269	0.160158	-0.363974	0.653368
Current employment status: Full or part-time student	-0.00464342	-0.0440346	0.0347968	0.976199	Employment	Sociodemographics	6142#7	Sociodemographics	0.993648	-0.000743787	-0.0402841	0.0386509
Job coding: builder's labourer, building worker	0.0211296	-0.160023	0.203385	0.976199	Employment history	Sociodemographics	22601#91212550	Sociodemographics	0.912548	0.0490228	-0.132836	0.227578
Job code - historical: Cleaners, domestics	-0.00924259	-0.0890993	0.0708286	0.976199	Employment history	Sociodemographics	22617#9233	Sociodemographics	0.675811	-0.052493	-0.133562	0.0279894
Job coding: textile machine operator, assembler, spinner, foreman	-0.0148097	-0.143088	0.114048	0.976199	Employment history	Sociodemographics	22601#81132710	Sociodemographics	0.955494	-0.0221262	-0.151976	0.106117
Job code - historical: Textile process operatives	-0.0148097	-0.143088	0.114048	0.976199	Employment history	Sociodemographics	22617#8113	Sociodemographics	0.955494	-0.0221262	-0.151976	0.106117
Job code - historical: Therapists n.e.c.	-0.00802016	-0.0779265	0.0620475	0.976199	Employment history	Sociodemographics	22617#3229	Sociodemographics	0.970159	0.00802077	-0.0623069	0.0778836
Job coding: speechwriter, translator	0.0409495	-0.314545	0.400548	0.976199	Employment history	Sociodemographics	22601#34123158	Sociodemographics	0.885666	0.112434	-0.246052	0.456822
Job coding: receptionist, doctor's/dental receptionist	-0.0128109	-0.125704	0.10054	0.976199	Employment history	Sociodemographics	22601#42163095	Sociodemographics	0.849594	-0.046051	-0.160757	0.0674669
Job coding: machine operator, kiln operator, foreman	-0.0296525	-0.290224	0.233378	0.976199	Employment history	Sociodemographics	22601#81122733	Sociodemographics	0.969149	-0.0306196	-0.297458	0.229573
Job code - historical: Glass and ceramics process operatives	-0.0296525	-0.290224	0.233378	0.976199	Employment history	Sociodemographics	22617#8112	Sociodemographics	0.969149	-0.0306196	-0.297458	0.229573
Job coding: architect, landscape architect/designer, structural designer	0.0123278	-0.0964376	0.121482	0.976199	Employment history	Sociodemographics	22601#24312597	Sociodemographics	0.776227	-0.0572152	-0.167342	0.0518078
Job coding: chartered/certified accountant, auditor, company accountant, articled/audit clerk, official receiver	0.00526993	-0.0416367	0.0522481	0.976199	Employment history	Sociodemographics	22601#24213281	Sociodemographics	0.75578	0.0258708	-0.0210847	0.0726207
Job code - historical: Chartered and certified accountants	0.00526993	-0.0416367	0.0522481	0.976199	Employment history	Sociodemographics	22617#2421	Sociodemographics	0.75578	0.0258708	-0.0210847	0.0726207
Job code - historical: Transport operatives n.e.c.	-0.0377518	-0.381127	0.309854	0.976199	Employment history	Sociodemographics	22617#8219	Sociodemographics	0.513076	-0.310139	-0.673913	0.04541
Job coding: optical technician	0.0638539	-0.519153	0.658371	0.976199	Employment history	Sociodemographics	22601#52242955	Sociodemographics	0.869369	0.205017	-0.38264	0.75701
Job coding: sea transport/traffic clerk, distribution clerk/controller, shipping clerk/controller, fleet controller/administrator, aircraft load controller/clerk, traffic officer (port)	0.0378253	-0.310721	0.390425	0.976199	Employment history	Sociodemographics	22601#41342676	Sociodemographics	0.840341	-0.153199	-0.515484	0.198978
Job coding: taxi or cab driver, chauffeur, hearse driver	-0.013843	-0.14351	0.116395	0.976199	Employment history	Sociodemographics	22601#82142611	Sociodemographics	0.989949	-0.00554336	-0.136459	0.123734
Job code - historical: Taxi, cab drivers and chauffeurs	-0.013843	-0.14351	0.116395	0.976199	Employment history	Sociodemographics	22617#8214	Sociodemographics	0.989949	-0.00554336	-0.136459	0.123734
Job code - historical: Ambulance staff (excluding paramedics)	-0.0236765	-0.246473	0.200839	0.976199	Employment history	Sociodemographics	22617#6112	Sociodemographics	0.51485	0.184192	-0.0364947	0.399224
Heating type(s) in home: Electric storage heaters	0.003663	-0.0314428	0.0388076	0.977285	Household	Sociodemographics	6140#2	Sociodemographics	0.618653	0.0253557	-0.00969938	0.0603008
Job coding: broadcasting professional, broadcaster, news reporter; radio or television journalist, director or producer	0.0110707	-0.0956877	0.118209	0.977285	Employment history	Sociodemographics	22601#34323160	Sociodemographics	0.91728	-0.0284678	-0.13643	0.0784163
Job code - historical: Broadcasting associate professionals	0.0110707	-0.0956877	0.118209	0.977285	Employment history	Sociodemographics	22617#3432	Sociodemographics	0.91728	-0.0284678	-0.13643	0.0784163
Job coding: mobile machinery driver	0.0615374	-0.529393	0.662682	0.977285	Employment history	Sociodemographics	22601#82292852	Sociodemographics	0.991238	-0.0203053	-0.628711	0.557017
Job coding: other work in this industry: factory hand, mate, assistant, handler, loader	-0.021249	-0.228933	0.188085	0.977285	Employment history	Sociodemographics	22601#91392782	Sociodemographics	0.993648	-0.00568731	-0.329507	0.308405
Job coding: chartered surveyor, building surveyor, land surveyor, mining/minerals surveyor, river/water surveyor, surveyor and estimator, topographer, property surveyor	0.0122926	-0.108156	0.133204	0.977285	Employment history	Sociodemographics	22601#24343291	Sociodemographics	0.86248	0.044619	-0.0758278	0.163616
Job coding: emergency services control room/radio operator/officer	0.0256307	-0.228342	0.281898	0.977285	Employment history	Sociodemographics	22601#41423310	Sociodemographics	0.991238	-0.00865081	-0.268698	0.245052
Job code - historical: Assemblers (vehicles and metal goods)	0.00898617	-0.0804217	0.0986597	0.977285	Employment history	Sociodemographics	22617#8132	Sociodemographics	0.958246	0.0141344	-0.075447	0.102926
Job code - historical: Hand craft occupations n.e.c.	-0.0192257	-0.21076	0.17358	0.977285	Employment history	Sociodemographics	22617#5499	Sociodemographics	0.436494	0.180205	-0.00861742	0.364816
Job coding: fence erector	0.036254	-0.32527	0.402414	0.977285	Employment history	Sociodemographics	22601#91292585	Sociodemographics	0.941361	-0.0748099	-0.449131	0.287868
Job code - historical: Artists	0.014987	-0.135805	0.166551	0.977285	Employment history	Sociodemographics	22617#3411	Sociodemographics	0.421363	0.145615	-0.00353044	0.292201
Job code - historical: Chartered surveyors (not quantity surveyors)	-0.00729963	-0.0810675	0.0666412	0.977285	Employment history	Sociodemographics	22617#2434	Sociodemographics	0.981033	-0.00521989	-0.0793496	0.0683962
Job coding: model maker	-0.053928	-0.59394	0.497427	0.977285	Employment history	Sociodemographics	22601#54932912	Sociodemographics	0.981033	0.0373343	-0.522903	0.563921
Job code - historical: Quality assurance technicians	0.0107522	-0.0984123	0.12031	0.977285	Employment history	Sociodemographics	22617#3115	Sociodemographics	0.991238	-0.00374245	-0.113461	0.10481
Job coding: routine inspector, tester	0.0600086	-0.553498	0.686745	0.977285	Employment history	Sociodemographics	22601#81332766	Sociodemographics	0.993648	-0.00484402	-0.266026	0.249885
Job code - historical: Caretakers	0.0119946	-0.111968	0.136492	0.977285	Employment history	Sociodemographics	22617#6232	Sociodemographics	0.808387	-0.0604156	-0.186272	0.0640219
Job coding: weigher, grader, sorter, picker; weighbridge clerk/controller	0.0378243	-0.351526	0.432498	0.977285	Employment history	Sociodemographics	22601#81342717	Sociodemographics	0.986741	-0.0306732	-0.592333	0.501866
Gap coding: Retired	0.00194169	-0.0182415	0.0221227	0.977285	Employment history	Sociodemographics	22660#108	Sociodemographics	0.991238	-0.000714617	-0.0208592	0.0194363
Job coding: electronics engineer	0.0370295	-0.345313	0.424379	0.977285	Employment history	Sociodemographics	22601#21242681	Sociodemographics	0.850159	-0.157386	-0.554982	0.228171
Job code - historical: Fishing and agriculture related occupations n.e.c.	0.0142568	-0.133854	0.163114	0.977285	Employment history	Sociodemographics	22617#9119	Sociodemographics	0.955494	-0.0257492	-0.175968	0.122333
Total traffic load on major roads	0.000956201	-0.00905692	0.0109693	0.977285	Residential air pollution	Sociodemographics	24013	Sociodemographics	0.965627	-0.001205	-0.011218	0.00880797
Job coding: rail transport/traffic clerk, distribution clerk/controller, shipping clerk/controller	0.0270778	-0.255545	0.312339	0.977285	Employment history	Sociodemographics	22601#41342672	Sociodemographics	0.948467	0.053116	-0.23146	0.328986
Job coding: environmental health officer/inspector, meat inspector, public health officer, port inspector, air pollution officer	0.0224477	-0.214433	0.261101	0.977448	Employment history	Sociodemographics	22601#35683468	Sociodemographics	0.751339	-0.135181	-0.379798	0.10492
Job code - historical: Environmental health officers	0.0224477	-0.214433	0.261101	0.977448	Employment history	Sociodemographics	22617#3568	Sociodemographics	0.751339	-0.135181	-0.379798	0.10492
Workplace very dusty: Rarely/never	-0.0020043	-0.0239204	0.019899	0.977448	Employment history	Sociodemographics	22609#0	Sociodemographics	0.765326	-0.011709	-0.0335519	0.010169
Job coding: residential manager, day care manager, nursing home manager, retirement home manager, convalescent home manager	0.0100433	-0.0999324	0.120416	0.977448	Employment history	Sociodemographics	22601#11853100	Sociodemographics	0.997744	-0.000913545	-0.111686	0.108693
Job coding: assembler, machine operator, processor, foreman	-0.0114863	-0.138332	0.115926	0.977448	Employment history	Sociodemographics	22601#81392824	Sociodemographics	0.953606	0.0231799	-0.104592	0.14936
Job coding: jcb driver, plant operator, pile driver	-0.0250228	-0.304291	0.256722	0.977448	Employment history	Sociodemographics	22601#82292532	Sociodemographics	0.38547	0.27127	0.000603846	0.532483
Job coding: countryside or park ranger, countryside or environmental warden	0.0214863	-0.218968	0.263875	0.977448	Employment history	Sociodemographics	22601#35522495	Sociodemographics	0.989949	-0.0107699	-0.256511	0.229584
Job code - historical: Countryside and park rangers	0.0214863	-0.218968	0.263875	0.977448	Employment history	Sociodemographics	22617#3552	Sociodemographics	0.989949	-0.0107699	-0.256511	0.229584
Job coding: school cleaner	0.0528273	-0.534097	0.652435	0.977448	Employment history	Sociodemographics	22601#92333415	Sociodemographics	0.993398	0.0130531	-0.595019	0.585813
Job coding: other work in this industry: factory hand, mate, assistant, handler, loader	-0.0264788	-0.324349	0.274386	0.977448	Employment history	Sociodemographics	22601#91392741	Sociodemographics	0.993648	-0.00568731	-0.329507	0.308405
Job coding: laundry worker, dry cleaner, presser, ironer, carpet cleaner	-0.020937	-0.257527	0.21759	0.977448	Employment history	Sociodemographics	22601#92342992	Sociodemographics	0.812712	-0.115117	-0.35938	0.124328
Job code - historical: Launderers, dry cleaners, pressers	-0.020937	-0.257527	0.21759	0.977448	Employment history	Sociodemographics	22617#9234	Sociodemographics	0.812712	-0.115117	-0.35938	0.124328
Job coding: conference/exhibition manager	0.0396486	-0.40838	0.49465	0.977448	Employment history	Sociodemographics	22601#12223174	Sociodemographics	0.828513	0.199153	-0.247896	0.622785
Job coding: physiotherapist	-0.00800201	-0.100351	0.084632	0.977642	Employment history	Sociodemographics	22601#32213078	Sociodemographics	0.928275	-0.0220621	-0.115489	0.0705586
Job code - historical: Physiotherapists	-0.00800201	-0.100351	0.084632	0.977642	Employment history	Sociodemographics	22617#3221	Sociodemographics	0.928275	-0.0220621	-0.115489	0.0705586
Job coding: compositor, originator, lithographic plate maker, paste-up artist, stereotyper, typesetter	0.012921	-0.136215	0.162791	0.977642	Employment history	Sociodemographics	22601#54212886	Sociodemographics	0.981033	-0.0101263	-0.160115	0.137683
Job code - historical: Originators, compositors and print preparers	0.012921	-0.136215	0.162791	0.977642	Employment history	Sociodemographics	22617#5421	Sociodemographics	0.981033	-0.0101263	-0.160115	0.137683
Job coding: quantity surveyor, quantity survey technician	0.0180979	-0.1933	0.230979	0.977642	Employment history	Sociodemographics	22601#24333290	Sociodemographics	0.979491	-0.0099355	-0.123473	0.102387
Job coding: university research fellow or assistant/associate	-0.00641675	-0.0842315	0.0715995	0.977642	Employment history	Sociodemographics	22601#23293029	Sociodemographics	0.975504	-0.00786915	-0.086349	0.0700414
Job code - historical: Glass and ceramics makers, decorators and finishers	0.0194347	-0.216933	0.257727	0.977642	Employment history	Sociodemographics	22617#5491	Sociodemographics	0.513076	-0.205618	-0.450053	0.0345492
Job coding: lock keeper, bridge/swingbridge worker, lighthouse keeper/pontoon man	-0.0507073	-0.663968	0.576341	0.977642	Employment history	Sociodemographics	22601#82192656	Sociodemographics	0.999406	0.000582158	-0.638445	0.599825
Job coding: civil service administrative officer or assistant or clerk, tax collector, prison service clerk, law courts clerk	-0.00263282	-0.035257	0.0300236	0.977642	Employment history	Sociodemographics	22601#41123205	Sociodemographics	0.976686	0.0031112	-0.0295877	0.0357163
Job code - historical: Civil Service administrative officers and assistants	-0.00263282	-0.035257	0.0300236	0.977642	Employment history	Sociodemographics	22617#4112	Sociodemographics	0.976686	0.0031112	-0.0295877	0.0357163
Job coding: assembler, machine operator, foreman	0.00914957	-0.105904	0.124643	0.977642	Employment history	Sociodemographics	22601#81312794	Sociodemographics	0.928275	-0.0333068	-0.174628	0.106141
Job coding: librarian, assistant librarian	-0.00592762	-0.0805383	0.0688732	0.977642	Employment history	Sociodemographics	22601#24513314	Sociodemographics	0.449806	-0.105971	-0.217914	0.00492004
Job coding: pipe fitter	-0.0469919	-0.635126	0.55065	0.977642	Employment history	Sociodemographics	22601#52162690	Sociodemographics	0.961543	0.0518834	-0.297021	0.387942
Qualifications	-0.000748832	-0.0102245	0.00872844	0.977642	Education	Sociodemographics	6138#100	Sociodemographics	0.0206895	0.0165699	0.00710652	0.0260288
Education score (Scotland)	0.00112169	-0.0130997	0.0153431	0.977642	Indices of Multiple Deprivation	Sociodemographics	26431	Sociodemographics	0.64146	0.0100404	-0.00427074	0.0243515
Job coding: debt, rent or other cash collector, meter reader, vending machine operator, toll booth operator	0.0270635	-0.317271	0.375273	0.977642	Employment history	Sociodemographics	22601#71223338	Sociodemographics	0.753184	0.187302	-0.156694	0.517814
Job code - historical: Debt, rent and other cash collectors	0.0270635	-0.317271	0.375273	0.977642	Employment history	Sociodemographics	22617#7122	Sociodemographics	0.753184	0.187302	-0.156694	0.517814
Job code - historical: Managers and proprietors in other services n.e.c.	-0.0153812	-0.212535	0.183131	0.977642	Employment history	Sociodemographics	22617#1239	Sociodemographics	0.939992	-0.0408003	-0.241882	0.156643
Job coding: accounts and wages clerk/assistant/supervisor, bookkeeper, cost or ledger clerk, audit assistant, budget officer, student loans officer, paymaster	0.0052239	-0.0620248	0.0726242	0.977642	Employment history	Sociodemographics	22601#41223253	Sociodemographics	0.995302	0.000905692	-0.0665883	0.0679665
Job coding: bus inspector	-0.0321872	-0.444345	0.386219	0.977642	Employment history	Sociodemographics	22601#82192608	Sociodemographics	0.366089	-0.455605	-0.898139	-0.022623
Job coding: civilian scenes of crime officer	-0.0246251	-0.340896	0.29501	0.977642	Employment history	Sociodemographics	22601#33193444	Sociodemographics	0.835401	0.135378	-0.182045	0.441545
Job coding: nurseryman, market gardener, horticulturist	0.0122395	-0.145674	0.170984	0.977642	Employment history	Sociodemographics	22601#51122486	Sociodemographics	0.835401	0.06819	-0.0898273	0.223612
Job code - historical: Horticultural trades	0.0122395	-0.145674	0.170984	0.977642	Employment history	Sociodemographics	22617#5112	Sociodemographics	0.835401	0.06819	-0.0898273	0.223612
Job coding: other engineering technician, including materials technician, technical assistant, technical officer	-0.00616464	-0.0874763	0.0753673	0.977642	Employment history	Sociodemographics	22601#31193055	Sociodemographics	0.941071	-0.0165883	-0.0983093	0.0645005
Job code - historical: Elementary security occupations n.e.c.	0.0136612	-0.167864	0.196281	0.977642	Employment history	Sociodemographics	22617#9249	Sociodemographics	0.963698	-0.0241049	-0.208685	0.157349
Job involved shift work: No	-0.00215244	-0.030954	0.0266243	0.977642	Employment history	Sociodemographics	22620#0	Sociodemographics	0.999406	0.000119869	-0.0286277	0.0289387
Job coding: production and process engineer	-0.0138988	-0.19919	0.172553	0.977642	Employment history	Sociodemographics	22601#21272684	Sociodemographics	0.993398	0.00320603	-0.10656	0.111791
Ever had cervical smear test	-0.00253817	-0.036579	0.0314672	0.977642	Female-specific factors	Sociodemographics	2694	Sociodemographics	0.845863	-0.01391	-0.047813	0.0200999
Job code - historical: Physicists, geologists and meteorologists	-0.00574346	-0.0828264	0.0715382	0.977642	Employment history	Sociodemographics	22617#2113	Sociodemographics	0.953606	-0.0139594	-0.0914237	0.0629377
Job code - historical: Chefs, cooks	0.00534868	-0.0665184	0.077384	0.977642	Employment history	Sociodemographics	22617#5434	Sociodemographics	0.670814	0.0470676	-0.0247904	0.118416
Job coding: engineering technician	0.0206596	-0.256519	0.300124	0.977642	Employment history	Sociodemographics	22601#31132868	Sociodemographics	0.853075	-0.110634	-0.395807	0.16781
Maternal smoking around birth	-0.000596628	-0.00864335	0.00745093	0.977642	Early life factors	Sociodemographics	1787	Sociodemographics	0.986741	0.000443469	-0.00760918	0.00849364
Job coding: import agent, export agent, shipping agent	-0.0133805	-0.194695	0.169104	0.977642	Employment history	Sociodemographics	22601#35363269	Sociodemographics	0.883395	-0.0594714	-0.244299	0.122287
Job code - historical: Importers, exporters	-0.0133805	-0.194695	0.169104	0.977642	Employment history	Sociodemographics	22617#3536	Sociodemographics	0.883395	-0.0594714	-0.244299	0.122287
Job coding: vehicle body builder, fitter or repairer	-0.0220692	-0.323013	0.282124	0.977642	Employment history	Sociodemographics	22601#52322661	Sociodemographics	0.84854	0.121723	-0.182024	0.415852
Job coding: masseur	-0.0263838	-0.387995	0.33964	0.977642	Employment history	Sociodemographics	22601#32293361	Sociodemographics	0.835144	-0.165487	-0.543762	0.201905
Job coding: routine inspector, tester	0.0353598	-0.451536	0.529497	0.977642	Employment history	Sociodemographics	22601#81332776	Sociodemographics	0.993648	-0.00484402	-0.266026	0.249885
Job coding: moulder, floor moulder, coremaker, die caster	0.026897	-0.349103	0.407479	0.977756	Employment history	Sociodemographics	22601#52122922	Sociodemographics	0.942436	-0.0755162	-0.461961	0.298598
Job coding: electrician, electrical fitter	0.00708855	-0.0959229	0.11045	0.979018	Employment history	Sociodemographics	22601#52412543	Sociodemographics	0.605123	-0.182666	-0.427839	0.0581327
Job coding: florist, flower or floral arranger	-0.0192564	-0.300574	0.264735	0.979018	Employment history	Sociodemographics	22601#54962957	Sociodemographics	0.979775	0.0236387	-0.262326	0.30164
Job code - historical: Floral arrangers, florists	-0.0192564	-0.300574	0.264735	0.979018	Employment history	Sociodemographics	22617#5496	Sociodemographics	0.979775	0.0236387	-0.262326	0.30164
Job coding: television, video, audio or radio engineer/repairer/installer/technician	-0.0125404	-0.201653	0.177813	0.979374	Employment history	Sociodemographics	22601#52443062	Sociodemographics	0.868363	0.0676425	-0.121778	0.253278
Job coding: docker, stevedore, slinger	-0.0317553	-0.50993	0.452314	0.979374	Employment history	Sociodemographics	22601#91412654	Sociodemographics	0.753184	-0.272362	-0.770572	0.209439
Job code - historical: Stevedores, dockers and slingers	-0.0317553	-0.50993	0.452314	0.979374	Employment history	Sociodemographics	22617#9141	Sociodemographics	0.753184	-0.272362	-0.770572	0.209439
Job coding: bricklayer	0.0122429	-0.175049	0.200721	0.979374	Employment history	Sociodemographics	22601#53122524	Sociodemographics	0.738011	0.106328	-0.0802166	0.2891
Job coding: mining engineer in mining, water or natural gas/oil	-0.0127952	-0.208803	0.184491	0.979374	Employment history	Sociodemographics	22601#21212864	Sociodemographics	0.743191	0.109592	-0.0849609	0.299948
Qualifications: Other professional qualifications eg: nursing, teaching	-0.000486246	-0.00801022	0.00703848	0.979374	Education	Sociodemographics	6138#6	Sociodemographics	0.149187	-0.0101863	-0.0177169	-0.00265827
Job coding: pipelayer	-0.0376226	-0.623768	0.560375	0.979374	Employment history	Sociodemographics	22601#81492531	Sociodemographics	0.84854	-0.249848	-0.872754	0.348127
Job coding: taxation accountant or adviser or consultant or practitioner	0.00818917	-0.121504	0.138463	0.979374	Employment history	Sociodemographics	22601#35353268	Sociodemographics	0.957816	0.0205926	-0.109855	0.149341
Job code - historical: Taxation experts	0.00818917	-0.121504	0.138463	0.979374	Employment history	Sociodemographics	22617#3535	Sociodemographics	0.957816	0.0205926	-0.109855	0.149341
Domestic garden percentage, buffer 1000m	-0.000224441	-0.0038316	0.00338272	0.979374	Greenspace and coastal proximity	Sociodemographics	24501	Sociodemographics	0.899078	0.00105655	-0.00254806	0.00466115
Job coding: toy maker	-0.0265707	-0.450268	0.403812	0.979374	Employment history	Sociodemographics	22601#54992960	Sociodemographics	0.477302	0.368306	-0.0416609	0.754975
Job coding: engineering technician	-0.0149399	-0.261012	0.233228	0.980015	Employment history	Sociodemographics	22601#31132688	Sociodemographics	0.853075	-0.110634	-0.395807	0.16781
Year gap started	0.000423448	-0.00658345	0.00743035	0.980015	Employment history	Sociodemographics	22663	Sociodemographics	0.513076	0.00609356	-0.000900892	0.013088
Job coding: it operations technician, computer operator or technician, database manager, network or web technician, web master, systems administrator or officer	0.00375351	-0.059219	0.0668583	0.980015	Employment history	Sociodemographics	22601#31313060	Sociodemographics	0.845863	0.025844	-0.0373312	0.0886438
Job code - historical: IT operations technicians	0.00375351	-0.059219	0.0668583	0.980015	Employment history	Sociodemographics	22617#3131	Sociodemographics	0.845863	0.025844	-0.0373312	0.0886438
Job code - historical: Statutory examiners	-0.0162108	-0.289249	0.25953	0.980078	Employment history	Sociodemographics	22617#3566	Sociodemographics	0.510428	-0.247586	-0.53327	0.032835
Job coding: probation officer, community service officer	-0.0158162	-0.284	0.254857	0.980368	Employment history	Sociodemographics	22601#24433449	Sociodemographics	0.957816	0.0234784	-0.125317	0.170028
Workplace very hot	-0.00079126	-0.0145296	0.0129461	0.980537	Employment history	Sociodemographics	22608#1	Sociodemographics	0.845863	0.00567666	-0.00805919	0.0194157
Job coding: aircraft engineer, aircraft fitter, aircraft ground engineer	0.033351	-0.559035	0.637008	0.980537	Employment history	Sociodemographics	22601#52232932	Sociodemographics	0.787297	0.287251	-0.295313	0.828045
Night shifts worked: This type of shift pattern was not worked during job	-0.000842564	-0.0162819	0.0146004	0.981321	Employment history	Sociodemographics	22650#9	Sociodemographics	0.835401	-0.00669326	-0.0221539	0.00875602
Job coding: routine inspector, tester	0.0211984	-0.376453	0.424012	0.982603	Employment history	Sociodemographics	22601#81332817	Sociodemographics	0.993648	-0.00484402	-0.266026	0.249885
Job code - historical: Garage managers and proprietors	0.00719968	-0.131018	0.146068	0.982603	Employment history	Sociodemographics	22617#1232	Sociodemographics	0.531365	-0.116508	-0.257545	0.0228078
Job coding: health and safety officer, occupational hygienist, safety adviser	-0.010562	-0.216653	0.196939	0.982603	Employment history	Sociodemographics	22601#35672595	Sociodemographics	0.982438	-0.0198567	-0.339484	0.290136
Job coding: other engineering professional	0.00409508	-0.0767084	0.0851132	0.982603	Employment history	Sociodemographics	22601#21293047	Sociodemographics	0.9753	0.00819095	-0.0728436	0.0885963
Job code - historical: Carpenters and joiners	-0.00427977	-0.0891397	0.0808236	0.982603	Employment history	Sociodemographics	22617#5315	Sociodemographics	0.955494	0.0146047	-0.0705301	0.099043
Job coding: chef, cook, caterer	-0.00549549	-0.115082	0.104495	0.982603	Employment history	Sociodemographics	22601#54342896	Sociodemographics	0.912548	0.0254462	-0.0687038	0.118728
Job coding: other assembler, routine operative	0.0103102	-0.198102	0.220152	0.982603	Employment history	Sociodemographics	22601#81392750	Sociodemographics	0.993398	-0.00495763	-0.218935	0.204722
Job coding: recycling manager, refuse disposal manager, incinerator manager, landfill site manager	-0.0150369	-0.319014	0.292139	0.982603	Employment history	Sociodemographics	22601#12353009	Sociodemographics	0.779793	-0.161624	-0.477755	0.147076
Current employment status: Looking after home and/or family	0.000769686	-0.0151285	0.0166746	0.982603	Employment	Sociodemographics	6142#3	Sociodemographics	0.927938	0.00389735	-0.0120121	0.0197865
Job coding: veterinarian	0.0109325	-0.214632	0.238233	0.982603	Employment history	Sociodemographics	22601#22163124	Sociodemographics	0.964461	0.0729956	-0.529757	0.638903
Job coding: hospital porter	0.0136053	-0.27014	0.300217	0.982603	Employment history	Sociodemographics	22601#92213002	Sociodemographics	0.949789	0.0533962	-0.234824	0.333201
Job coding: agricultural machine driver, tractor driver	-0.0130019	-0.285799	0.262124	0.982603	Employment history	Sociodemographics	22601#82232479	Sociodemographics	0.981033	0.038514	-0.513709	0.559738
Year job started	-0.000213278	-0.00471847	0.00429191	0.982603	Employment history	Sociodemographics	22602	Sociodemographics	0.697927	-0.00282987	-0.0073348	0.00167506
Job coding: baker, confectioner, pastry cook, cake decorator	0.0218768	-0.448892	0.501179	0.984081	Employment history	Sociodemographics	22601#54323386	Sociodemographics	0.835144	0.0698674	-0.088602	0.225695
Job coding: quality assurance manager, quality control manager	0.0054284	-0.117297	0.128663	0.985149	Employment history	Sociodemographics	22601#11412694	Sociodemographics	0.960515	0.0189461	-0.104307	0.140692
Job coding: millwright	0.0155202	-0.335148	0.3696	0.985149	Employment history	Sociodemographics	22601#52232931	Sociodemographics	0.314792	0.361076	0.0279204	0.677529
Job coding: senior official in central government including members of the senior civil service and the equivalent in the diplomatic service, mps, meps	0.00307934	-0.0679902	0.0743174	0.985309	Employment history	Sociodemographics	22601#11113200	Sociodemographics	0.961543	-0.0105039	-0.0818871	0.0603896
Job code - historical: Senior officials in national government	0.00307934	-0.0679902	0.0743174	0.985309	Employment history	Sociodemographics	22617#1111	Sociodemographics	0.961543	-0.0105039	-0.0818871	0.0603896
Number of jobs held	-0.000539344	-0.0130946	0.0120159	0.985568	Employment history	Sociodemographics	22599	Sociodemographics	0.929521	-0.00290571	-0.0154485	0.00963705
Job coding: paramedic, ambulance paramedic	0.0157704	-0.35097	0.387857	0.985801	Employment history	Sociodemographics	22601#32133436	Sociodemographics	0.828513	-0.119848	-0.384326	0.139076
Job code - historical: Pattern makers (moulds)	0.0119323	-0.274629	0.301098	0.985868	Employment history	Sociodemographics	22617#5493	Sociodemographics	0.987216	0.0148646	-0.274701	0.296129
Job code - historical: Agricultural machinery drivers	0.00962749	-0.222152	0.243075	0.985868	Employment history	Sociodemographics	22617#8223	Sociodemographics	0.881336	0.0762889	-0.154988	0.301911
Job coding: electronic engineer (maintenance), alarm engineer, office equipment engineer	-0.00612267	-0.155931	0.144441	0.985868	Employment history	Sociodemographics	22601#52492949	Sociodemographics	0.649791	0.102139	-0.0470241	0.248913
Job coding: mining engineer, petroleum engineer	-0.0111697	-0.284046	0.264351	0.985868	Employment history	Sociodemographics	22601#21213039	Sociodemographics	0.927938	0.0669922	-0.208467	0.334717
Job coding: bookbinder, print finisher, collator, binder's assistant, darkroom technician	0.00848208	-0.20472	0.223184	0.986646	Employment history	Sociodemographics	22601#54232888	Sociodemographics	0.900842	0.0613117	-0.152573	0.270411
Job code - historical: Bookbinders and print finishers	0.00848208	-0.20472	0.223184	0.986646	Employment history	Sociodemographics	22617#5423	Sociodemographics	0.900842	0.0613117	-0.152573	0.270411
Job coding: senior official of special interest organisation including general manager or director or executive or general secretary of charity, or trade union/association or religious organisation	0.00177591	-0.0433926	0.047011	0.986646	Employment history	Sociodemographics	22601#11143212	Sociodemographics	0.508287	-0.0399727	-0.0854789	0.0053452
Job code - historical: Senior officials of special interest organisations	0.00177591	-0.0433926	0.047011	0.986646	Employment history	Sociodemographics	22617#1114	Sociodemographics	0.508287	-0.0399727	-0.0854789	0.0053452
Heating type(s) in home: Portable gas or paraffin heaters	-0.0044408	-0.117571	0.109142	0.986646	Household	Sociodemographics	6140#4	Sociodemographics	0.967336	0.0134622	-0.10035	0.126041
Work hours - lumped category	0.00084921	-0.0210628	0.0227728	0.986907	Employment history	Sociodemographics	22604#1	Sociodemographics	0.95683	0.00222916	-0.0116273	0.0160883
Job coding: other customs and excise or immigration officer, coastguard, emergency planning officer, civilian scenes of crime officer, civilian defence officer	-0.00910657	-0.247005	0.230674	0.987312	Employment history	Sociodemographics	22601#33193452	Sociodemographics	0.981033	-0.0168909	-0.259389	0.220229
Job coding: pattern maker (moulds)	0.0134725	-0.350833	0.382014	0.987312	Employment history	Sociodemographics	22601#54932911	Sociodemographics	0.904472	0.102054	-0.262198	0.451572
Job code - historical: Legal secretaries	-0.00209004	-0.0661275	0.0620855	0.990535	Employment history	Sociodemographics	22617#4212	Sociodemographics	0.989949	0.00276536	-0.0615387	0.0666806
Job coding: aircraft or airline engineer, fitter, maintainer	-0.0162955	-0.518517	0.494218	0.990535	Employment history	Sociodemographics	22601#52232663	Sociodemographics	0.984157	-0.0301806	-0.546571	0.462322
Job coding: factory cleaner/industrial cleaner in some other setting	-0.00645397	-0.212071	0.200666	0.991017	Employment history	Sociodemographics	22601#91322983	Sociodemographics	0.63481	-0.149724	-0.362448	0.0595364
Job code - historical: Electrical/electronics engineers n.e.c.	0.0026964	-0.0841064	0.0897485	0.991053	Employment history	Sociodemographics	22617#5249	Sociodemographics	0.927938	0.0208165	-0.0661506	0.107044
Job coding: vocational or industrial trainer/instructor, craft instructor, apprentice instructor	-0.00383712	-0.128347	0.121212	0.991068	Employment history	Sociodemographics	22601#35633214	Sociodemographics	0.885666	0.0395571	-0.085137	0.162645
Job code - historical: Actors, entertainers	-0.00448892	-0.153255	0.145034	0.991068	Employment history	Sociodemographics	22617#3413	Sociodemographics	0.972658	0.0157488	-0.134617	0.163921
Job coding: scientific researcher, scientific officer, medical research associate, experimental officer	-0.00179501	-0.0618348	0.0583648	0.991068	Employment history	Sociodemographics	22601#23213026	Sociodemographics	0.719309	-0.0365595	-0.0971805	0.023726
Job code - historical: Scientific researchers	-0.00179501	-0.0618348	0.0583648	0.991068	Employment history	Sociodemographics	22617#2321	Sociodemographics	0.719309	-0.0365595	-0.0971805	0.023726
Job coding: shopping centre manager	-0.0139766	-0.516297	0.497088	0.991778	Employment history	Sociodemographics	22601#12313323	Sociodemographics	0.971245	0.0558916	-0.457695	0.543087
Job coding: kitchen, canteen or catering assistant, washer-up, kitchen porter, counter assistant	-0.00278812	-0.110577	0.105372	0.99237	Employment history	Sociodemographics	22601#92233387	Sociodemographics	0.993648	-0.00211216	-0.111265	0.105946
Job coding: glass blower, glass cutter, glass maker	0.0101597	-0.39704	0.422748	0.992919	Employment history	Sociodemographics	22601#54912899	Sociodemographics	0.688123	-0.270195	-0.697836	0.145907
Job coding: carpenter, carpenter and joiner, builder's joiner	0.0035825	-0.143307	0.151206	0.992919	Employment history	Sociodemographics	22601#53152529	Sociodemographics	0.961543	0.0222005	-0.125704	0.167965
Job coding: air traffic controller, flight planner, flight dispatcher	-0.00546437	-0.231205	0.221998	0.992919	Employment history	Sociodemographics	22601#35112639	Sociodemographics	0.854367	0.0870783	-0.13897	0.307649
Job code - historical: Air traffic controllers	-0.00546437	-0.231205	0.221998	0.992919	Employment history	Sociodemographics	22617#3511	Sociodemographics	0.854367	0.0870783	-0.13897	0.307649
Job coding: computer installation and maintenance engineer/repairer/installer/technician	-0.00279406	-0.119041	0.113908	0.992919	Employment history	Sociodemographics	22601#52453063	Sociodemographics	0.993398	0.002632	-0.11446	0.118411
Job coding: archivist, conservator, curator	-0.00613369	-0.273797	0.264077	0.993555	Employment history	Sociodemographics	22601#24523036	Sociodemographics	0.95683	0.0431833	-0.228344	0.307403
Job coding: builder's labourer, building worker	-0.00812832	-0.362746	0.351499	0.993555	Employment history	Sociodemographics	22601#91212562	Sociodemographics	0.912548	0.0490228	-0.132836	0.227578
Job coding: scenery designer, costume designer	-0.00584425	-0.263747	0.254401	0.993555	Employment history	Sociodemographics	22601#34223153	Sociodemographics	0.969149	0.0299638	-0.232375	0.285484
Current employment status: Unemployed	-0.000620044	-0.0285282	0.0273138	0.993555	Employment	Sociodemographics	6142#5	Sociodemographics	0.897679	0.00825327	-0.019691	0.0361258
Job coding: ophthalmic optician, optometrist	0.00432266	-0.19295	0.202912	0.993555	Employment history	Sociodemographics	22601#22143069	Sociodemographics	0.989949	-0.00777048	-0.208855	0.189423
Job code - historical: Ophthalmic opticians	0.00432266	-0.19295	0.202912	0.993555	Employment history	Sociodemographics	22617#2214	Sociodemographics	0.989949	-0.00777048	-0.208855	0.189423
Had menopause	0.00045055	-0.0209928	0.0218909	0.993657	Female-specific factors	Sociodemographics	2724	Sociodemographics	0.879837	-0.0074341	-0.0288762	0.0140098
Job coding: other assembler, routine operative	-0.00373044	-0.204422	0.198365	0.993969	Employment history	Sociodemographics	22601#81392821	Sociodemographics	0.993398	-0.00495763	-0.218935	0.204722
Job code - historical: Quality assurance managers	-0.00160635	-0.107331	0.104498	0.995295	Employment history	Sociodemographics	22617#1141	Sociodemographics	0.942436	-0.0209798	-0.127727	0.084695
Job coding: sports player	0.0048471	-0.315259	0.328342	0.995295	Employment history	Sociodemographics	22601#34413137	Sociodemographics	0.881336	0.105413	-0.21718	0.417377
Job code - historical: Sports players	0.0048471	-0.315259	0.328342	0.995295	Employment history	Sociodemographics	22617#3441	Sociodemographics	0.881336	0.105413	-0.21718	0.417377
Job coding: routine laboratory tester	0.00485913	-0.346827	0.360959	0.995859	Employment history	Sociodemographics	22601#81382839	Sociodemographics	0.981033	-0.0289253	-0.457515	0.382884
Job code - historical: Mechanical engineers	0.000670409	-0.0518391	0.0532664	0.996616	Employment history	Sociodemographics	22617#2122	Sociodemographics	0.953606	-0.00941029	-0.0620175	0.042943
Job coding: astrologer, medium, palmist, water diviner, phrenologist, fortune teller	-0.00702849	-0.591842	0.591374	0.996737	Employment history	Sociodemographics	22601#62223366	Sociodemographics	0.953606	0.105103	-0.497596	0.671305
Job coding: machine operator, furnaceman, foreman	-0.00524322	-0.548183	0.547101	0.997526	Employment history	Sociodemographics	22601#81192784	Sociodemographics	0.963931	0.0705813	-0.48354	0.593411
Job code - historical: Process operatives n.e.c.	-0.00524322	-0.548183	0.547101	0.997526	Employment history	Sociodemographics	22617#8119	Sociodemographics	0.963931	0.0705813	-0.48354	0.593411
Worked with pesticides	0.000769047	-0.0879679	0.0897655	0.997526	Employment history	Sociodemographics	22614#2	Sociodemographics	0.878523	-0.0311848	-0.120842	0.0577364
Job coding: aircraft engineer	-0.00129288	-0.17108	0.169543	0.997526	Employment history	Sociodemographics	22601#52232942	Sociodemographics	0.986741	0.00938871	-0.161919	0.177816
Workplace very noisy	-9.27416e-05	-0.0137459	0.0135596	0.997526	Employment history	Sociodemographics	22606#1	Sociodemographics	0.930509	-0.00312313	-0.0167741	0.0105297
Part of a multiple birth	0.000147924	-0.0228783	0.0231906	0.997526	Early life factors	Sociodemographics	1777	Sociodemographics	0.884449	-0.00745245	-0.0305374	0.0155836
Job coding: insurance underwriter, insurance inspector, insurance account handler	-0.000657954	-0.105828	0.104885	0.997526	Employment history	Sociodemographics	22601#35333259	Sociodemographics	0.964461	-0.0131649	-0.119199	0.0918004
Job coding: hairdresser, barber, shampooist, hair stylist	-0.000470783	-0.0981145	0.0974983	0.997526	Employment history	Sociodemographics	22601#62213359	Sociodemographics	0.508287	0.0854407	-0.0118897	0.181769
Job code - historical: Hairdressers, barbers	-0.000470783	-0.0981145	0.0974983	0.997526	Employment history	Sociodemographics	22617#6221	Sociodemographics	0.508287	0.0854407	-0.0118897	0.181769
Job coding: credit controller/supervisor	0.000623317	-0.138545	0.140452	0.997526	Employment history	Sociodemographics	22601#41213252	Sociodemographics	0.953606	-0.0251003	-0.166247	0.114222
Job coding: local government administrative officer or assistant or clerk	0.000103955	-0.0300016	0.0302368	0.997526	Employment history	Sociodemographics	22601#41133206	Sociodemographics	0.605123	-0.0226889	-0.0529589	0.00750143
Job code - historical: Local government clerical officers and assistants	0.000103955	-0.0300016	0.0302368	0.997526	Employment history	Sociodemographics	22617#4113	Sociodemographics	0.605123	-0.0226889	-0.0529589	0.00750143
Job coding: estimator, valuer, building estimator/assessor, insurance assessor, costing engineer, surveyor/valuer, lottery officer, rating officer, marine/naval surveyor	0.00034223	-0.101964	0.103005	0.997526	Employment history	Sociodemographics	22601#35313264	Sociodemographics	0.963162	-0.0324828	-0.273518	0.203119
Job code - historical: Customer care occupations	0.000147314	-0.0500735	0.0504502	0.997526	Employment history	Sociodemographics	22617#7212	Sociodemographics	0.856644	0.0194462	-0.0309249	0.0695814
Rest days during night shift periods	9.94343e-05	-0.0953485	0.0955474	0.99912	Employment history	Sociodemographics	22655	Sociodemographics	0.479243	0.0866327	-0.00761915	0.180884
Abdominal pain	-0.00851472	-0.0187528	0.00172564	0.71761	symptoms	Disease Diagnoses	41270#785	symptoms	0.997643	-9.58353e-05	-0.0103412	0.0101421
Superficial cellulitis and abscess	0.0161525	-0.0607007	0.0931882	0.964044	dermatologic	Disease Diagnoses	41270#681	dermatologic	0.972658	-0.00817209	-0.0853951	0.0684781
Benign neoplasm of breast	0.0102989	-0.0437714	0.0644582	0.967088	genitourinary	Disease Diagnoses	41270#610.4	genitourinary	0.616984	0.0395958	-0.0143384	0.0932419
Delirium due to conditions classified elsewhere	0.00970167	-0.0242721	0.0437089	0.947491	mental disorders	Disease Diagnoses	41270#290.2	mental disorders	0.562708	-0.0268172	-0.0609693	0.00722705
Uterine leiomyoma	0.0160789	-0.00487715	0.0370477	0.789365	neoplasms	Disease Diagnoses	41270#218.1	neoplasms	0.618653	0.0151341	-0.00579566	0.0360264
Diseases of spleen	-0.0259657	-0.095007	0.043229	0.931106	hematopoietic	Disease Diagnoses	41270#289.5	hematopoietic	0.575128	-0.0541629	-0.124089	0.0153198
Cholelithiasis	-0.000138448	-0.0198874	0.0196221	0.997526	digestive	Disease Diagnoses	41270#574.1	digestive	0.805829	-0.00960374	-0.0294009	0.0101582
Hypercholesterolemia	0.00836704	-0.00205403	0.0187906	0.7535	endocrine/metabolic	Disease Diagnoses	41270#272.11	endocrine/metabolic	0.00148518	0.0224022	0.0120059	0.0327921
Obesity	-0.00701821	-0.0209676	0.00693645	0.87359	endocrine/metabolic	Disease Diagnoses	41270#278.1	endocrine/metabolic	0.971531	-0.00149756	-0.0154615	0.0124499
Meningitis	0.0903767	-0.00440906	0.185426	0.655204	neurological	Disease Diagnoses	41270#320	neurological	0.922433	0.0242382	-0.0703653	0.117956
Senile cataract	-9.33892e-05	-0.0153029	0.0151219	0.997526	sense organs	Disease Diagnoses	41270#366.2	sense organs	0.915373	-0.00409279	-0.0193166	0.0111123
Cancer of prostate	0.00800292	-0.0136539	0.029672	0.931794	neoplasms	Disease Diagnoses	41270#185	neoplasms	0.105707	0.0309917	0.00941451	0.052531
Sepsis	0.0064101	-0.017055	0.0298916	0.947491	injuries & poisonings	Disease Diagnoses	41270#994.2	injuries & poisonings	0.513076	-0.0199815	-0.0435295	0.00351588
Cancer of bronchus; lung	-0.0056465	-0.0402374	0.0289803	0.973559	neoplasms	Disease Diagnoses	41270#165.1	neoplasms	0.623159	-0.0249869	-0.0597785	0.00969237
Hemangioma and lymphangioma, any site	-0.0252868	-0.0715223	0.0210179	0.859337	neoplasms	Disease Diagnoses	41270#228	neoplasms	0.981033	-0.00335667	-0.0498007	0.0428812
Candidiasis	-0.0110733	-0.0430386	0.0209238	0.944066	infectious diseases	Disease Diagnoses	41270#112	infectious diseases	0.013474	-0.0586481	-0.0909481	-0.0264414
Ganglion and cyst of synovium, tendon, and bursa	0.0129726	-0.0220303	0.0480137	0.931794	musculoskeletal	Disease Diagnoses	41270#727.4	musculoskeletal	0.541087	0.0285803	-0.00632869	0.0633706
Malignant neoplasm of female breast	-0.00799189	-0.0255729	0.00959714	0.892373	neoplasms	Disease Diagnoses	41270#174.11	neoplasms	0.930509	-0.00398548	-0.0215955	0.0135994
Asthma	0.0104262	-0.00151966	0.0223761	0.684886	respiratory	Disease Diagnoses	41270#495	respiratory	0.547753	-0.00972659	-0.0216879	0.00222318
Lipoma of skin and subcutaneous tissue	0.00807042	-0.0218762	0.0380453	0.947491	neoplasms	Disease Diagnoses	41270#214.1	neoplasms	0.751339	0.0166483	-0.013268	0.046479
Hidradenitis	-0.0316976	-0.179248	0.116575	0.962797	dermatologic	Disease Diagnoses	41270#705.3	dermatologic	0.699235	0.0914411	-0.0559782	0.236581
Iron deficiency anemias, unspecified or not due to blood loss	-0.00787224	-0.0259525	0.0102174	0.903609	hematopoietic	Disease Diagnoses	41270#280.1	hematopoietic	0.605865	-0.0135793	-0.0317149	0.00452693
Malignant neoplasm of testis	0.0008391	-0.126996	0.129283	0.997526	neoplasms	Disease Diagnoses	41270#187.2	neoplasms	0.962358	-0.0186584	-0.148059	0.109235
Varicose veins of lower extremity	0.0240466	0.00416047	0.0439449	0.439267	circulatory system	Disease Diagnoses	41270#454.1	circulatory system	0.196382	0.0252419	0.00542263	0.0450253
Other non-epithelial cancer of skin	-0.108866	-0.124846	-0.0928824	9.09249e-38	neoplasms	Disease Diagnoses	41270#172.2	neoplasms	1.33433e-26	-0.0927868	-0.109025	-0.0765715
Noninfectious gastroenteritis	0.00401673	-0.0124495	0.0204909	0.953073	digestive	Disease Diagnoses	41270#558	digestive	0.94761	0.00314536	-0.013325	0.0195918
Other peripheral nerve disorders	0.000605115	-0.0168462	0.0180653	0.989306	neurological	Disease Diagnoses	41270#351	neurological	0.909216	-0.00483642	-0.022312	0.0126121
Essential hypertension	-0.00147378	-0.00941546	0.0064686	0.970737	circulatory system	Disease Diagnoses	41270#401.1	circulatory system	0.665158	0.00529149	-0.00264643	0.0132275
Benign neoplasm of colon	-0.000586298	-0.0128015	0.0116327	0.982603	neoplasms	Disease Diagnoses	41270#208	neoplasms	0.650901	0.00839286	-0.00381493	0.0205891
Diverticulosis	0.0113537	0.00075649	0.0219538	0.544253	digestive	Disease Diagnoses	41270#562.1	digestive	6.34305e-05	0.0266468	0.0160812	0.0372052
Large cell lymphoma	-0.00940585	-0.0767949	0.0581247	0.973559	neoplasms	Disease Diagnoses	41270#202.24	neoplasms	0.232042	-0.0837087	-0.152161	-0.0156656
Inguinal hernia	-0.0047948	-0.0205122	0.0109285	0.947491	digestive	Disease Diagnoses	41270#550.1	digestive	0.325864	0.0171929	0.00149993	0.0328677
Nasal polyps	0.0371323	0.00140627	0.0728981	0.583201	respiratory	Disease Diagnoses	41270#471	respiratory	0.868357	-0.0129763	-0.0487822	0.0227092
Hypothyroidism NOS	0.0562608	0.0411525	0.0713767	1.0477e-10	endocrine/metabolic	Disease Diagnoses	41270#244.4	endocrine/metabolic	0.42377	-0.0148289	-0.0299373	0.000260623
Ectropion or entropion	-0.0491919	-0.0990754	0.000767268	0.633869	sense organs	Disease Diagnoses	41270#374.1	sense organs	0.00701056	-0.0977988	-0.1486	-0.0472213
Other disorders of urethra and urinary tract	-0.00225531	-0.0677969	0.0634213	0.989306	genitourinary	Disease Diagnoses	41270#597	genitourinary	0.489397	0.0588988	-0.00633969	0.123697
Bacterial pneumonia	-0.0368433	-0.0866949	0.0130878	0.805116	respiratory	Disease Diagnoses	41270#480.1	respiratory	0.930509	-0.0115587	-0.0617307	0.038373
Malignant neoplasm of ovary	0.00855907	-0.04865	0.0658702	0.973559	neoplasms	Disease Diagnoses	41270#184.11	neoplasms	0.955494	0.00985182	-0.0474648	0.0668571
Gastritis and duodenitis	0.00615332	-0.00822304	0.0205356	0.903609	digestive	Disease Diagnoses	41270#535	digestive	0.883169	0.00473722	-0.0096365	0.0190935
Mitral valve disease	-0.0135884	-0.0448564	0.0177087	0.903609	circulatory system	Disease Diagnoses	41270#394.2	circulatory system	0.95284	-0.00580771	-0.0371735	0.0254655
Other anemias	0.00093619	-0.014694	0.0165732	0.980015	hematopoietic	Disease Diagnoses	41270#285	hematopoietic	0.689498	-0.00992845	-0.0255876	0.00570947
Diseases and other conditions of the tongue	0.00405724	-0.0525915	0.060807	0.977648	digestive	Disease Diagnoses	41270#529	digestive	0.852214	0.0222619	-0.034377	0.0785836
Pulmonary heart disease	0.00346743	-0.0235754	0.0305323	0.973559	circulatory system	Disease Diagnoses	41270#415	circulatory system	0.961543	-0.00412588	-0.0312162	0.0228956
Polyp of corpus uteri	0.0146318	-0.00837715	0.0376564	0.808415	genitourinary	Disease Diagnoses	41270#622.1	genitourinary	0.479243	0.0211086	-0.00185355	0.0440243
Malignant neoplasm of uterus	-0.00440215	-0.0532452	0.0445155	0.977448	neoplasms	Disease Diagnoses	41270#182	neoplasms	0.930509	-0.0112524	-0.0603159	0.037589
Fracture of lower limb	0.0215799	-0.0155452	0.0587477	0.841151	injuries & poisonings	Disease Diagnoses	41270#800	injuries & poisonings	0.392199	0.0373253	0.00035589	0.07416
Cataract	-0.00185362	-0.0146108	0.0109072	0.973559	sense organs	Disease Diagnoses	41270#366	sense organs	0.470766	-0.0118865	-0.024665	0.000879825
Otitis media	0.0565454	-0.00346515	0.116664	0.662946	sense organs	Disease Diagnoses	41270#381.1	sense organs	0.513076	0.0511413	-0.00847383	0.110391
Ankylosing spondylitis	0.0507243	-0.0345431	0.136211	0.836967	musculoskeletal	Disease Diagnoses	41270#715.2	musculoskeletal	0.835144	0.0378805	-0.0471579	0.122184
Tobacco use disorder	0.000257838	-0.0138086	0.0143299	0.993969	mental disorders	Disease Diagnoses	41270#318	mental disorders	0.627845	0.0100513	-0.00400998	0.0240961
Malignant neoplasm of bladder	-0.0124573	-0.049832	0.0249579	0.947491	neoplasms	Disease Diagnoses	41270#189.21	neoplasms	0.84854	0.0151751	-0.0222083	0.0524229
Umbilical hernia	-0.0163654	-0.0460089	0.0133058	0.858105	digestive	Disease Diagnoses	41270#550.4	digestive	0.989871	0.00133501	-0.0283739	0.0309607
Type 2 diabetes	0.00415681	-0.00917837	0.0174967	0.947491	endocrine/metabolic	Disease Diagnoses	41270#250.2	endocrine/metabolic	0.343041	0.0142236	0.000908805	0.0275244
Benign neoplasm of skin	-0.0530998	-0.0761758	-0.0300076	0.00110942	neoplasms	Disease Diagnoses	41270#216	neoplasms	0.095188	-0.0339506	-0.0572216	-0.0107285
Encephalitis	0.0170105	-0.0887898	0.123162	0.973559	neurological	Disease Diagnoses	41270#323	neurological	0.953606	0.0191918	-0.0869147	0.124182
Hemorrhage of gastrointestinal tract	0.00580771	-0.0152763	0.0269053	0.947491	digestive	Disease Diagnoses	41270#578.9	digestive	0.147039	0.0285128	0.00749372	0.0494907
Trigeminal nerve disorders [CN5]	0.0442162	-0.0320615	0.120668	0.844258	neurological	Disease Diagnoses	41270#352.1	neurological	0.978342	0.00682329	-0.0695771	0.0826598
Esophageal bleeding (varices/hemorrhage)	0.0169846	-0.0223232	0.0563404	0.903609	digestive	Disease Diagnoses	41270#530.2	digestive	0.943121	-0.00772765	-0.0471388	0.0315361
Normal delivery	0.0144878	-0.0354149	0.0644398	0.947491	pregnancy complications	Disease Diagnoses	41270#650	pregnancy complications	0.915543	-0.0134857	-0.0638297	0.0366387
Benign neoplasm of ovary	-0.0337852	-0.0831453	0.0156527	0.805116	neoplasms	Disease Diagnoses	41270#220	neoplasms	0.964461	-0.00639446	-0.0560355	0.0430165
Malignant neoplasm of rectum, rectosigmoid junction, and anus	-0.028127	-0.0662021	0.00999301	0.805116	neoplasms	Disease Diagnoses	41270#153.3	neoplasms	0.866221	-0.0141003	-0.0523816	0.0240426
Hyperlipidemia	0.0195287	-0.0038264	0.0429	0.71428	endocrine/metabolic	Disease Diagnoses	41270#272.1	endocrine/metabolic	0.672723	0.0152145	-0.0080994	0.0384781
Sebaceous cyst	-0.0379813	-0.0599342	-0.0160138	0.056966	dermatologic	Disease Diagnoses	41270#706.2	dermatologic	0.971245	0.00239776	-0.0196163	0.0243672
Major depressive disorder	0.0375276	-0.0574583	0.132789	0.920968	mental disorders	Disease Diagnoses	41270#296.22	mental disorders	0.044046	0.149672	0.0564726	0.241874
Other conditions of brain	0.0106383	-0.114466	0.136238	0.977642	neurological	Disease Diagnoses	41270#348	neurological	0.977113	-0.0116829	-0.137892	0.113003
Ectopic pregnancy	0.105958	-0.0262952	0.238461	0.757046	pregnancy complications	Disease Diagnoses	41270#634.3	pregnancy complications	0.912166	-0.0365466	-0.170463	0.0957031
Cancer of hypopharynx	-0.0454085	-0.292175	0.203445	0.970918	neoplasms	Disease Diagnoses	41270#149.3	neoplasms	0.991238	-0.00840536	-0.260197	0.237401
Type 2 diabetes with ophthalmic manifestations	0.0471583	0.00535999	0.0890085	0.498848	endocrine/metabolic	Disease Diagnoses	41270#250.23	endocrine/metabolic	0.963162	-0.00593859	-0.0477754	0.0357304
Benign neoplasm of unspecified sites	-0.028828	-0.0706437	0.0130445	0.805116	neoplasms	Disease Diagnoses	41270#229	neoplasms	0.513076	-0.0364482	-0.0786379	0.00557864
Type 1 diabetes	0.0774002	0.0400414	0.114801	0.00644176	endocrine/metabolic	Disease Diagnoses	41270#250.1	endocrine/metabolic	0.9753	-0.00380884	-0.0411321	0.0333817
Malignant neoplasm of gallbladder and extrahepatic bile ducts	0.0261213	-0.0846646	0.137278	0.957853	neoplasms	Disease Diagnoses	41270#159.3	neoplasms	0.995302	-0.00145688	-0.112867	0.108754
Hemorrhoids	-0.00398789	-0.0181576	0.0101874	0.947491	circulatory system	Disease Diagnoses	41270#455	circulatory system	0.616984	0.0103741	-0.00378898	0.0245203
Acute upper respiratory infections of multiple or unspecified sites	-0.0145481	-0.0639331	0.0349155	0.947491	respiratory	Disease Diagnoses	41270#465	respiratory	0.979775	0.00430284	-0.0452347	0.0536044
Hyposmolality and/or hyponatremia	-0.00264364	-0.0312531	0.02599	0.977448	endocrine/metabolic	Disease Diagnoses	41270#276.12	endocrine/metabolic	0.343041	-0.0308027	-0.0595799	-0.00210155
Migraine	0.00894934	-0.0215877	0.0395154	0.947491	neurological	Disease Diagnoses	41270#340	neurological	0.999406	7.10763e-05	-0.0305158	0.0305702
GERD	-0.00640529	-0.0193818	0.00657564	0.874803	digestive	Disease Diagnoses	41270#530.11	digestive	0.330105	0.0141268	0.00116469	0.0270754
Pain in limb	0.00707788	-0.0153239	0.029495	0.947491	symptoms	Disease Diagnoses	41270#773	symptoms	0.992534	0.00069683	-0.0217247	0.023072
Ovarian cyst	-0.00571818	-0.0355624	0.024152	0.967088	genitourinary	Disease Diagnoses	41270#628	genitourinary	0.927938	0.00734709	-0.022539	0.0371512
Peripheral angiopathy in diseases classified elsewhere	-0.00590873	-0.0871373	0.0755249	0.977642	circulatory system	Disease Diagnoses	41270#443.7	circulatory system	0.527993	-0.0685129	-0.150918	0.0132803
Hypertrophy of breast (Gynecomastia)	0.0215654	-0.0515893	0.0948863	0.947491	genitourinary	Disease Diagnoses	41270#612.2	genitourinary	0.885666	0.0233664	-0.049821	0.0960266
Atrial fibrillation and flutter	-0.00695507	-0.023739	0.0098359	0.916957	circulatory system	Disease Diagnoses	41270#427.2	circulatory system	0.343041	-0.0179876	-0.0348216	-0.00117763
Hodgkin's disease	0.0125926	-0.103602	0.129226	0.976199	neoplasms	Disease Diagnoses	41270#201	neoplasms	0.997942	-0.00073684	-0.117733	0.114946
Macular degeneration (senile) of retina NOS	0.00355507	-0.0241239	0.0312563	0.973559	sense organs	Disease Diagnoses	41270#362.29	sense organs	0.489397	-0.0251654	-0.052976	0.00257506
Hematuria	-0.0113015	-0.0272634	0.00466736	0.805116	genitourinary	Disease Diagnoses	41270#593	genitourinary	0.00192714	0.0337326	0.0178232	0.0496203
Other benign neoplasm of uterus	0.066915	-0.0418758	0.17605	0.821405	neoplasms	Disease Diagnoses	41270#218.2	neoplasms	0.719905	0.0644838	-0.0436908	0.171447
Cancer of other endocrine glands	-0.130409	-0.322619	0.0631585	0.805116	neoplasms	Disease Diagnoses	41270#194	neoplasms	0.959912	-0.0304561	-0.22712	0.162633
Malignant neoplasm of kidney, except pelvis	-0.0137541	-0.0661686	0.0387457	0.950484	neoplasms	Disease Diagnoses	41270#189.11	neoplasms	0.989949	0.00212383	-0.0504611	0.05444
Acute tonsillitis	0.0409021	-0.0415919	0.123612	0.874803	respiratory	Disease Diagnoses	41270#474.1	respiratory	0.739915	0.0469977	-0.0353047	0.128623
Contracture of palmar fascia [Dupuytren's disease]	-0.0137387	-0.0446568	0.0172077	0.898783	musculoskeletal	Disease Diagnoses	41270#728.71	musculoskeletal	0.778252	-0.0161235	-0.0471786	0.0148415
Other symptoms/disorders or the urinary system	-0.00912574	-0.0313157	0.0130786	0.918606	genitourinary	Disease Diagnoses	41270#599	genitourinary	0.835144	0.0099016	-0.0122878	0.0320457
Hypovolemia	0.000806698	-0.024598	0.0262305	0.990932	endocrine/metabolic	Disease Diagnoses	41270#276.5	endocrine/metabolic	0.928784	-0.00598894	-0.0314417	0.0194038
Fluid overload	0.0208513	-0.028174	0.0699474	0.906112	endocrine/metabolic	Disease Diagnoses	41270#276.6	endocrine/metabolic	0.343041	-0.0527187	-0.10218	-0.00348014
Pernicious anemia	0.0230995	-0.0396352	0.0859555	0.931794	hematopoietic	Disease Diagnoses	41270#281.11	hematopoietic	0.689924	-0.0399823	-0.103245	0.0229168
Disorders of lacrimal system	-0.0263785	-0.0674211	0.0147168	0.808415	sense organs	Disease Diagnoses	41270#375	sense organs	0.482732	-0.0378154	-0.0792261	0.00343908
Thyrotoxicosis with or without goiter	0.0557025	0.0110662	0.100398	0.405472	endocrine/metabolic	Disease Diagnoses	41270#242	endocrine/metabolic	0.000296205	-0.106189	-0.151454	-0.0610971
Other chronic ischemic heart disease, unspecified	0.0045602	-0.0105122	0.0196384	0.947491	circulatory system	Disease Diagnoses	41270#411.8	circulatory system	0.508287	0.0132336	-0.00181707	0.0282665
Hypertrophy of female genital organs	0.017647	-0.0408358	0.0762313	0.947491	genitourinary	Disease Diagnoses	41270#623	genitourinary	0.661902	0.039242	-0.0190824	0.0972271
Pain in joint	0.0223073	0.00245789	0.0421686	0.498848	musculoskeletal	Disease Diagnoses	41270#745	musculoskeletal	0.380077	0.0202912	0.00049782	0.0400487
Dysuria	-0.01166	-0.0660792	0.0428544	0.962797	genitourinary	Disease Diagnoses	41270#599.3	genitourinary	0.562708	0.0428176	-0.0114772	0.0968141
Vascular hamartomas and non-neoplastic nevi	0.0955321	-0.192802	0.38625	0.947491	neoplasms	Disease Diagnoses	41270#217	neoplasms	0.981903	-0.0189322	-0.312035	0.266275
Arthropathy NOS	0.00254075	-0.00692125	0.0120046	0.947491	musculoskeletal	Disease Diagnoses	41270#716.9	musculoskeletal	0.997643	-9.18437e-05	-0.0095534	0.00936422
Pancreatic cancer	-0.0436815	-0.103806	0.0165589	0.805116	neoplasms	Disease Diagnoses	41270#157	neoplasms	0.661643	-0.0409897	-0.101806	0.0194869
Type 2 diabetes with neurological manifestations	0.0369519	-0.0325181	0.106568	0.863057	endocrine/metabolic	Disease Diagnoses	41270#250.24	endocrine/metabolic	0.931911	0.0152867	-0.0541837	0.0842785
Macroglobulinemia	0.0172656	-0.173996	0.209588	0.977448	endocrine/metabolic	Disease Diagnoses	41270#270.35	endocrine/metabolic	0.508287	-0.172967	-0.370324	0.0213703
Alzheimer's disease	0.0500022	0.00142725	0.0986449	0.589303	mental disorders	Disease Diagnoses	41270#290.11	mental disorders	0.991238	0.00173431	-0.0468653	0.0501088
Lymphoid leukemia, chronic	0.0143209	-0.0591451	0.0879482	0.967088	neoplasms	Disease Diagnoses	41270#204.12	neoplasms	0.91728	-0.0195814	-0.0935235	0.0538408
Anal and rectal conditions	0.00900965	-0.0119341	0.0299669	0.903609	digestive	Disease Diagnoses	41270#565	digestive	0.878523	0.00731523	-0.0136232	0.0282132
Retinal detachments and defects	0.0379085	-0.00294429	0.0788121	0.664546	sense organs	Disease Diagnoses	41270#361	sense organs	0.27502	0.0469654	0.00636931	0.0873957
Reflux esophagitis	0.0087723	-0.00934459	0.026899	0.880891	digestive	Disease Diagnoses	41270#530.14	digestive	0.252592	0.0215862	0.00351287	0.0396302
Cancer of larynx	0.066593	-0.0491694	0.182736	0.847487	neoplasms	Disease Diagnoses	41270#149.4	neoplasms	0.835731	0.0496015	-0.0657565	0.163572
Strabismus (not specified as paralytic)	-0.0093852	-0.072376	0.0537341	0.973559	sense organs	Disease Diagnoses	41270#378.1	sense organs	0.879837	-0.0219135	-0.0853804	0.0411756
Nonspecific abnormal findings in stool contents	0.0304085	-0.00523822	0.0660942	0.70387	digestive	Disease Diagnoses	41270#579.8	digestive	0.947229	0.00681792	-0.0288118	0.0423257
Chronic airway obstruction	0.0104213	-0.00810411	0.0289565	0.857978	respiratory	Disease Diagnoses	41270#496	respiratory	0.867488	0.0068121	-0.0117071	0.0253012
Sciatica	0.00346399	-0.0297637	0.036726	0.977285	symptoms	Disease Diagnoses	41270#764	symptoms	0.936035	0.00701886	-0.0262296	0.0401617
Symptoms involving digestive system	0.0165978	0.00174174	0.0314603	0.503439	digestive	Disease Diagnoses	41270#561	digestive	0.734978	0.00862001	-0.00621875	0.02344
Anxiety disorder	0.0143664	-0.00380715	0.03255	0.768229	mental disorders	Disease Diagnoses	41270#300.1	mental disorders	0.0931845	0.0265593	0.00844504	0.0446441
Ptosis of eyelid	-0.0348303	-0.0762049	0.00659802	0.709065	sense organs	Disease Diagnoses	41270#374.3	sense organs	0.719606	-0.024973	-0.0666548	0.0165476
Carbuncle and furuncle	-0.0108934	-0.0493716	0.0276328	0.947491	dermatologic	Disease Diagnoses	41270#686.1	dermatologic	0.719309	0.0230658	-0.0154038	0.0613906
Phlebitis and thrombophlebitis of lower extremities	0.0181549	-0.0110253	0.047361	0.817784	circulatory system	Disease Diagnoses	41270#451.2	circulatory system	0.719309	-0.0177426	-0.0470144	0.0114493
Cancer of tongue	0.091206	-0.00970341	0.192408	0.665552	neoplasms	Disease Diagnoses	41270#145.2	neoplasms	0.981033	0.00766018	-0.0933149	0.107642
Other benign neoplasm of connective and other soft tissue	-0.00472274	-0.0617074	0.0523664	0.977642	neoplasms	Disease Diagnoses	41270#215	neoplasms	0.95683	-0.00937364	-0.0666529	0.0475929
Late pregnancy and failed induction	-0.000368447	-0.0615444	0.0608745	0.997526	pregnancy complications	Disease Diagnoses	41270#645	pregnancy complications	0.993407	-0.00131992	-0.0630218	0.0600409
Vitamin B-complex deficiencies	0.018815	-0.0269566	0.0646509	0.918606	endocrine/metabolic	Disease Diagnoses	41270#261.2	endocrine/metabolic	0.928784	-0.0108326	-0.0567618	0.0348969
Thyroid cancer	0.132419	0.0362847	0.228805	0.256454	neoplasms	Disease Diagnoses	41270#193	neoplasms	0.343041	0.100697	0.00600585	0.194424
Other disorders of thyroid	0.067563	-0.0135142	0.148832	0.716864	endocrine/metabolic	Disease Diagnoses	41270#246	endocrine/metabolic	0.993398	0.0023109	-0.0788684	0.0828549
Open wounds of extremities	0.0256928	-0.00249539	0.0539062	0.664546	injuries & poisonings	Disease Diagnoses	41270#871	injuries & poisonings	0.167891	0.036905	0.00885003	0.0648838
Diseases of white blood cells	-0.0197916	-0.0806957	0.0412318	0.947491	hematopoietic	Disease Diagnoses	41270#288	hematopoietic	0.264648	-0.0724141	-0.134226	-0.0109408
Cellulitis and abscess of leg, except foot	0.00556781	-0.0174749	0.0286266	0.953963	dermatologic	Disease Diagnoses	41270#681.5	dermatologic	0.971245	-0.00258114	-0.0256516	0.02044
Primary thrombocytopenia	-0.0203384	-0.103838	0.0633878	0.953073	hematopoietic	Disease Diagnoses	41270#287.31	hematopoietic	0.295335	-0.0962778	-0.181375	-0.0117999
First degree AV block	0.0115187	-0.0287834	0.0518682	0.947491	circulatory system	Disease Diagnoses	41270#426.21	circulatory system	0.607242	0.0300181	-0.0101748	0.0700518
Other and unspecified disc disorder	0.0181653	-0.00989781	0.0462531	0.808415	musculoskeletal	Disease Diagnoses	41270#722.9	musculoskeletal	0.963162	-0.0039877	-0.0320889	0.0240394
Colon cancer	-0.0027308	-0.0336626	0.0282298	0.977448	neoplasms	Disease Diagnoses	41270#153.2	neoplasms	0.779729	-0.0160308	-0.0470892	0.0149376
Transient cerebral ischemia	0.028355	-0.00953672	0.0662895	0.800656	circulatory system	Disease Diagnoses	41270#433.31	circulatory system	0.928784	-0.00893608	-0.0469037	0.0288952
Paroxysmal supraventricular tachycardia	-0.0221122	-0.0572568	0.0130707	0.816925	circulatory system	Disease Diagnoses	41270#427.11	circulatory system	0.868357	0.0127324	-0.0224491	0.0477947
Esophagitis, GERD and related diseases	-0.00836431	-0.0279607	0.0112433	0.904304	digestive	Disease Diagnoses	41270#530.1	digestive	0.927938	0.00469716	-0.0149125	0.0242719
Breast cancer [female]	0.0130929	-0.0281403	0.0543786	0.947491	neoplasms	Disease Diagnoses	41270#174.1	neoplasms	0.930509	0.00933643	-0.0319198	0.050433
Primary angle-closure glaucoma	-0.00431732	-0.0624812	0.0539525	0.977642	sense organs	Disease Diagnoses	41270#365.2	sense organs	0.766917	0.0308273	-0.0273074	0.0886268
Myeloproliferative disease	-0.0039988	-0.0635384	0.0556508	0.979374	neoplasms	Disease Diagnoses	41270#200	neoplasms	0.287587	-0.0688371	-0.12916	-0.00883776
Dementia with cerebral degenerations	0.00955749	-0.11966	0.139266	0.977642	mental disorders	Disease Diagnoses	41270#290.12	mental disorders	0.861187	-0.0486605	-0.179649	0.080758
Lipoma	0.0356131	-0.00791531	0.0792002	0.733697	neoplasms	Disease Diagnoses	41270#214	neoplasms	0.869369	0.015569	-0.0279008	0.0588545
Learning disorder	-0.137277	-0.270151	-0.00369131	0.589303	mental disorders	Disease Diagnoses	41270#315.1	mental disorders	0.845863	-0.0558992	-0.192157	0.0787452
Stricture and stenosis of esophagus	-0.0198471	-0.0580921	0.018444	0.866154	digestive	Disease Diagnoses	41270#530.3	digestive	0.987216	-0.002019	-0.0403925	0.0362138
Uterine/Uterovaginal prolapse	0.00263854	-0.0243142	0.029613	0.977285	genitourinary	Disease Diagnoses	41270#618.2	genitourinary	0.173003	0.0351155	0.00825138	0.0619143
Allergic rhinitis	0.00919032	-0.0287378	0.047164	0.953759	respiratory	Disease Diagnoses	41270#476	respiratory	0.93768	-0.00793258	-0.0459716	0.0299695
Dysphagia	0.00761351	-0.0128606	0.0281002	0.931794	digestive	Disease Diagnoses	41270#532	digestive	0.719309	0.0123498	-0.00810272	0.0327638
Lyme disease	-0.000740593	-0.288488	0.289765	0.997526	infectious diseases	Disease Diagnoses	41270#130.1	infectious diseases	0.927938	0.0706368	-0.219448	0.352066
Other local infections of skin and subcutaneous tissue	-0.027704	-0.0714644	0.0161172	0.814757	dermatologic	Disease Diagnoses	41270#686	dermatologic	0.433819	-0.0427606	-0.0869487	0.00124832
Diseases of the oral soft tissues, excluding lesions specific for gingiva and tongue	0.00993615	-0.0302428	0.0501659	0.953073	digestive	Disease Diagnoses	41270#528	digestive	0.649791	-0.0278522	-0.0682581	0.0124018
Cough	0.000856699	-0.0287252	0.0304656	0.991427	respiratory	Disease Diagnoses	41270#512.8	respiratory	0.577946	-0.022981	-0.0527047	0.00666089
Intestinal malabsorption (non-celiac)	-0.00259027	-0.0943594	0.0894529	0.991741	digestive	Disease Diagnoses	41270#557	digestive	0.835144	-0.0404713	-0.133289	0.0515626
Schizophrenia	0.0892817	0.0117417	0.167004	0.498057	mental disorders	Disease Diagnoses	41270#295.1	mental disorders	0.540038	0.0629857	-0.013907	0.139269
Malignant neoplasm of other urinary organs	-0.0627755	-0.19883	0.0738626	0.892373	neoplasms	Disease Diagnoses	41270#189.4	neoplasms	0.765326	0.0722058	-0.0639141	0.206345
Phobia	0.0260219	-0.0301991	0.0823397	0.892373	mental disorders	Disease Diagnoses	41270#300.13	mental disorders	0.953606	-0.0101939	-0.0666073	0.0459179
Diseases of pulp and periapical tissues	-0.0304884	-0.113193	0.0524449	0.931794	digestive	Disease Diagnoses	41270#522	digestive	0.547753	-0.0680782	-0.152076	0.0152959
Benign neoplasm of lip, oral cavity, and pharynx	-0.0226976	-0.0834795	0.0382052	0.931794	neoplasms	Disease Diagnoses	41270#210	neoplasms	0.55174	-0.0496217	-0.111112	0.0115263
Hypermetropia	0.0198013	-0.0678597	0.107696	0.961181	sense organs	Disease Diagnoses	41270#367.8	sense organs	0.63481	0.0614967	-0.0257862	0.147992
Epiphora	-0.0509351	-0.111641	0.00989041	0.710137	sense organs	Disease Diagnoses	41270#375.2	sense organs	0.928819	-0.0142501	-0.0754589	0.0466054
Complication due to other implant and internal device	-0.0117728	-0.0425098	0.0189934	0.926516	injuries & poisonings	Disease Diagnoses	41270#859	injuries & poisonings	0.964461	0.00385183	-0.0269344	0.034548
Other signs and symptoms in breast	-0.031888	-0.123771	0.0602701	0.944066	genitourinary	Disease Diagnoses	41270#613.7	genitourinary	0.852214	-0.0366714	-0.129745	0.0556123
Osteoarthritis; localized	0.0112219	-0.00555996	0.0280119	0.805116	musculoskeletal	Disease Diagnoses	41270#740.1	musculoskeletal	0.841595	0.00715504	-0.00961273	0.0238985
Cancer of stomach	0.00208474	-0.0670165	0.0713315	0.991068	neoplasms	Disease Diagnoses	41270#151	neoplasms	0.719309	-0.0422572	-0.112042	0.0270754
Chronic venous insufficiency [CVI]	0.0926466	-0.00209978	0.187641	0.641978	circulatory system	Disease Diagnoses	41270#456	circulatory system	0.698524	0.0587177	-0.0353724	0.15189
Endometriosis	0.00333952	-0.0302449	0.0369559	0.977285	genitourinary	Disease Diagnoses	41270#615	genitourinary	0.616984	0.0246252	-0.00893057	0.0580767
Hearing loss	-0.00050488	-0.0245438	0.0235508	0.993657	sense organs	Disease Diagnoses	41270#389	sense organs	0.823517	0.0112244	-0.0128026	0.0351977
Sleep apnea	0.000475021	-0.0248273	0.0257973	0.993969	neurological	Disease Diagnoses	41270#327.3	neurological	0.963162	0.00339558	-0.0219305	0.0286619
Disorders of iron metabolism	0.00583904	-0.062329	0.0741575	0.977642	hematopoietic	Disease Diagnoses	41270#275.1	hematopoietic	0.955725	-0.0115832	-0.0801647	0.0565534
Chronic periodontitis	-0.0835206	-0.142292	-0.0246285	0.218915	digestive	Disease Diagnoses	41270#523.32	digestive	0.325864	-0.0653198	-0.125112	-0.00584173
Postmenopausal bleeding	0.0142325	-0.00775941	0.0362388	0.808415	genitourinary	Disease Diagnoses	41270#627.1	genitourinary	0.850159	0.00872719	-0.0132556	0.0306687
Urethral stricture (not specified as infectious)	0.00857783	-0.0239063	0.0410947	0.947491	genitourinary	Disease Diagnoses	41270#597.1	genitourinary	0.850495	0.0128726	-0.0196003	0.045244
Miscarriage; stillbirth	-0.00258345	-0.0378778	0.0327341	0.977642	pregnancy complications	Disease Diagnoses	41270#634	pregnancy complications	0.927938	0.00857285	-0.026889	0.0439367
Aplastic anemia	0.0156789	-0.0556821	0.0871941	0.961828	hematopoietic	Disease Diagnoses	41270#284	hematopoietic	0.0588959	-0.113104	-0.18578	-0.0408735
Epilepsy, recurrent seizures, convulsions	-0.0032191	-0.0346883	0.0282816	0.977285	neurological	Disease Diagnoses	41270#345	neurological	0.610764	-0.0235331	-0.0551735	0.00801491
Hallux valgus (Bunion)	-0.00428121	-0.0286823	0.0201376	0.973559	musculoskeletal	Disease Diagnoses	41270#735.3	musculoskeletal	0.0590665	0.0378275	0.0135163	0.0620847
Osteoarthrosis, localized, primary	-0.0106314	-0.0319438	0.010694	0.874555	musculoskeletal	Disease Diagnoses	41270#740.11	musculoskeletal	0.513076	-0.0185753	-0.0399722	0.00278037
Disorders of esophageal motility	0.0215554	-0.0430845	0.0863248	0.947491	digestive	Disease Diagnoses	41270#530.5	digestive	0.900554	0.0187255	-0.0459221	0.0829613
Cholelithiasis with other cholecystitis	-0.00685574	-0.0318733	0.0181809	0.947491	digestive	Disease Diagnoses	41270#574.12	digestive	0.995302	-0.00033682	-0.0253985	0.0246668
Neutropenia	-0.0101499	-0.0400046	0.0197323	0.947491	hematopoietic	Disease Diagnoses	41270#288.11	hematopoietic	0.605123	-0.0224792	-0.052491	0.00744935
Benign neoplasm of respiratory and intrathoracic organs	-0.0656114	-0.163737	0.0328468	0.805116	neoplasms	Disease Diagnoses	41270#212	neoplasms	0.963162	0.0131515	-0.0856957	0.111045
Neoplasm of uncertain behavior of breast	0.269232	0.0756192	0.463608	0.244998	neoplasms	Disease Diagnoses	41270#174.3	neoplasms	0.267888	0.217054	0.0294963	0.400395
Missed abortion/Hydatidiform mole	-0.00710584	-0.0717439	0.0576187	0.976199	pregnancy complications	Disease Diagnoses	41270#634.1	pregnancy complications	0.951837	0.0120665	-0.0529614	0.0767045
Right bundle branch block	0.00211843	-0.0324358	0.0367078	0.980015	circulatory system	Disease Diagnoses	41270#426.31	circulatory system	0.27502	0.0398044	0.00539665	0.0740959
Rheumatoid arthritis	0.0280856	0.00201352	0.0541785	0.544253	musculoskeletal	Disease Diagnoses	41270#714.1	musculoskeletal	0.540296	0.0213147	-0.00468118	0.0472469
Chronic fatigue syndrome	0.0487834	-0.0195506	0.11726	0.805116	symptoms	Disease Diagnoses	41270#798.1	symptoms	0.668084	0.0447108	-0.0233333	0.112287
Ulcerative colitis	0.0309092	-0.00428322	0.0661402	0.67837	digestive	Disease Diagnoses	41270#555.2	digestive	0.957816	0.00559651	-0.0295905	0.0406648
Meniere's disease	-0.0297929	-0.0987212	0.0392896	0.903609	sense organs	Disease Diagnoses	41270#386.1	sense organs	0.95683	0.0111587	-0.0580381	0.079887
Other hemoglobinopathies	0.0632478	-0.143698	0.271465	0.947491	hematopoietic	Disease Diagnoses	41270#282.8	hematopoietic	0.835144	0.0901209	-0.116039	0.291707
Coronary atherosclerosis	0.00356324	-0.0101376	0.0172687	0.951562	circulatory system	Disease Diagnoses	41270#411.4	circulatory system	0.508724	0.0119758	-0.00170735	0.0256452
Inflammation of eyelids	-0.00709203	-0.0459742	0.0318381	0.970918	sense organs	Disease Diagnoses	41270#371.3	sense organs	0.688123	0.0247582	-0.0140858	0.0634542
Pain and other symptoms associated with female genital organs	0.0493929	0.000707596	0.098146	0.602804	genitourinary	Disease Diagnoses	41270#625	genitourinary	0.922433	0.0125562	-0.0360984	0.0609836
Hypotension NOS	-0.000144374	-0.0233559	0.0230831	0.997526	circulatory system	Disease Diagnoses	41270#458.9	circulatory system	0.885666	-0.00739616	-0.0306554	0.0158133
Vertiginous syndromes and other disorders of vestibular system	-0.0279584	-0.220298	0.165592	0.973559	sense organs	Disease Diagnoses	41270#386	sense organs	0.280194	-0.229341	-0.429411	-0.0320685
Septal Deviations/Turbinate Hypertrophy	0.0265109	-0.00414363	0.0571955	0.68868	respiratory	Disease Diagnoses	41270#470	respiratory	0.8495	0.0123519	-0.0182728	0.0428876
Duodenal ulcer	0.0247943	-0.0107955	0.0604228	0.805116	digestive	Disease Diagnoses	41270#531.3	digestive	0.616984	0.0260688	-0.009415	0.0614295
Disorder of skin and subcutaneous tissue NOS	-0.0452109	-0.0672921	-0.0231155	0.00736742	dermatologic	Disease Diagnoses	41270#689	dermatologic	0.0463089	-0.035709	-0.0579663	-0.0134963
Other complications of pregnancy NEC	-0.00370448	-0.0508465	0.0434773	0.977642	pregnancy complications	Disease Diagnoses	41270#646	pregnancy complications	0.797535	0.0234373	-0.0238891	0.0705753
Myocardial infarction	0.0144312	-0.00217822	0.0310484	0.688185	circulatory system	Disease Diagnoses	41270#411.2	circulatory system	0.562708	0.0130874	-0.00349356	0.0296455
Cardiomegaly	-0.00801211	-0.0347744	0.0187712	0.947491	circulatory system	Disease Diagnoses	41270#416	circulatory system	0.979334	-0.00236828	-0.0291829	0.0243792
Benign neoplasm of other female genital organs	-0.0578444	-0.19246	0.077391	0.903609	neoplasms	Disease Diagnoses	41270#221	neoplasms	0.941361	0.0273443	-0.108379	0.161255
Disease of tricuspid valve	-0.0181254	-0.0566233	0.0204175	0.883636	circulatory system	Disease Diagnoses	41270#394.7	circulatory system	0.766829	-0.0205729	-0.0592957	0.0180093
Scar conditions and fibrosis of skin	-0.0584202	-0.0974728	-0.0193174	0.176706	dermatologic	Disease Diagnoses	41270#701.2	dermatologic	0.744558	-0.0222661	-0.0616459	0.0169696
Cancer of brain	-0.0367593	-0.110992	0.0376565	0.874803	neoplasms	Disease Diagnoses	41270#191.11	neoplasms	0.978342	-0.00676347	-0.081537	0.0674742
Duodenitis	0.0109276	-0.0106009	0.0324702	0.871299	digestive	Disease Diagnoses	41270#535.6	digestive	0.498632	-0.0193757	-0.0409763	0.00218263
Prolapse of vaginal walls	0.0111117	-0.0121075	0.0343468	0.883443	genitourinary	Disease Diagnoses	41270#618.1	genitourinary	0.508287	0.0204797	-0.00269348	0.0436063
Acute pharyngitis	0.0170834	-0.0434268	0.0777098	0.947491	respiratory	Disease Diagnoses	41270#465.2	respiratory	0.668084	0.0396517	-0.020694	0.0996318
Cancer of eye	-0.0551896	-0.195187	0.0854694	0.920968	neoplasms	Disease Diagnoses	41270#190	neoplasms	0.779714	-0.0735503	-0.216549	0.067673
Fracture of radius and ulna	0.0050799	-0.0202639	0.0304434	0.96564	injuries & poisonings	Disease Diagnoses	41270#803.2	injuries & poisonings	0.73985	0.014517	-0.0108089	0.0397833
Mucous polyp of cervix	0.0199582	-0.0171195	0.0570776	0.86033	genitourinary	Disease Diagnoses	41270#622.2	genitourinary	0.845863	0.015529	-0.0215162	0.0524447
Varicose veins of lower extremity, symptomtic	0.0417487	-0.0182294	0.101834	0.805116	circulatory system	Disease Diagnoses	41270#454.11	circulatory system	0.827583	0.0273471	-0.0324789	0.0868172
Stomatitis and mucositis (ulcerative)	0.00882171	-0.0743651	0.0922275	0.976199	digestive	Disease Diagnoses	41270#528.11	digestive	0.8495	-0.033766	-0.117717	0.0495378
Alcohol-related disorders	0.0159699	-0.00880233	0.0407618	0.808415	mental disorders	Disease Diagnoses	41270#317	mental disorders	0.599526	0.0186696	-0.00606442	0.0433466
Secondary malignancy of bone	-0.0106553	-0.0428646	0.0215854	0.947491	neoplasms	Disease Diagnoses	41270#198.6	neoplasms	0.890964	-0.00994172	-0.0422648	0.0222829
Sarcoidosis	0.0226903	-0.0513163	0.0968696	0.947491	dermatologic	Disease Diagnoses	41270#697	dermatologic	0.00776203	-0.144144	-0.219812	-0.0689332
Nausea and vomiting	0.00355826	-0.0127216	0.0198458	0.962442	symptoms	Disease Diagnoses	41270#789	symptoms	0.955494	-0.00282677	-0.0191238	0.0134471
Nerve plexus lesions	-0.02098	-0.190924	0.14992	0.975442	neurological	Disease Diagnoses	41270#353.1	neurological	0.992534	-0.0052233	-0.177304	0.164062
Malposition and malpresentation of fetus or obstruction	0.00805667	-0.0447805	0.0609442	0.973559	pregnancy complications	Disease Diagnoses	41270#652	pregnancy complications	0.432747	0.0511963	-0.001642	0.103794
Abnormal findings on exam of gastrointestinal tract/ abdominal area	0.0361677	-0.00230134	0.0746815	0.662946	digestive	Disease Diagnoses	41270#564.8	digestive	0.423898	0.0374451	-0.000830248	0.0755747
Cerebral degeneration, unspecified	-0.00831901	-0.0690583	0.0525343	0.973559	neurological	Disease Diagnoses	41270#331.9	neurological	0.885666	-0.0194465	-0.0805956	0.0413493
Paranoid disorders	0.0610403	-0.0583661	0.180871	0.870416	mental disorders	Disease Diagnoses	41270#295.2	mental disorders	0.849609	0.0477625	-0.0713663	0.165446
Constipation	0.0131718	-0.00223484	0.0285854	0.700269	digestive	Disease Diagnoses	41270#563	digestive	0.311435	0.0171474	0.00177331	0.0325013
Cyst or abscess of Bartholin's gland	0.0751884	-0.00548233	0.156037	0.664546	genitourinary	Disease Diagnoses	41270#614.53	genitourinary	0.540151	0.0655185	-0.0145765	0.144956
Hemorrhage of rectum and anus	0.00332464	-0.0148538	0.0215129	0.970918	digestive	Disease Diagnoses	41270#578.8	digestive	0.986492	-0.0010315	-0.0192276	0.0171348
Diaphragmatic hernia	0.00844258	-0.00297761	0.0198662	0.805116	digestive	Disease Diagnoses	41270#550.2	digestive	0.111925	0.016212	0.00481242	0.027602
Psoriasis vulgaris	0.03806	-0.000294023	0.0764593	0.626745	dermatologic	Disease Diagnoses	41270#696.41	dermatologic	2.77057e-26	0.210401	0.173286	0.247356
Tension headache	0.0391519	-0.0578944	0.136491	0.918824	mental disorders	Disease Diagnoses	41270#306.9	mental disorders	0.987216	-0.00515179	-0.102691	0.0914819
Multiple myeloma	-0.0457262	-0.111463	0.0201484	0.805116	neoplasms	Disease Diagnoses	41270#204.4	neoplasms	0.850159	-0.0263476	-0.0927289	0.0396194
Melanomas of skin	-0.147563	-0.179894	-0.115198	1.88376e-16	neoplasms	Disease Diagnoses	41270#172.11	neoplasms	4.32345e-10	-0.118077	-0.151209	-0.0850381
Cancer of esophagus	0.00174423	-0.057867	0.0614625	0.991315	neoplasms	Disease Diagnoses	41270#150	neoplasms	0.466652	-0.0563946	-0.116687	0.00356472
Cholelithiasis with acute cholecystitis	-0.0526716	-0.0957013	-0.00958129	0.428677	digestive	Disease Diagnoses	41270#574.11	digestive	0.927045	-0.0107794	-0.0540995	0.0323636
Internal derangement of knee	0.0129951	-0.00363831	0.029637	0.785962	injuries & poisonings	Disease Diagnoses	41270#835	injuries & poisonings	0.258295	-0.0198074	-0.0364906	-0.00314877
Cholecystitis without cholelithiasis	-0.00184241	-0.0370673	0.0334214	0.982603	digestive	Disease Diagnoses	41270#574.3	digestive	0.888211	0.0110904	-0.0241538	0.0462156
Benign neoplasm of other parts of digestive system	-0.0014374	-0.0230627	0.0202018	0.979374	neoplasms	Disease Diagnoses	41270#211	neoplasms	0.258295	0.0255886	0.00401528	0.047119
Labyrinthitis	-0.0299651	-0.0942456	0.0344516	0.888422	sense organs	Disease Diagnoses	41270#386.3	sense organs	0.883229	-0.0211859	-0.085997	0.0432317
Other chronic nonalcoholic liver disease	0.0116245	-0.0214347	0.0447182	0.941303	digestive	Disease Diagnoses	41270#571.5	digestive	0.241788	0.0399125	0.00699141	0.0727268
Other ill-defined and unknown causes of morbidity and mortality	-0.010997	-0.0261804	0.00419271	0.805116	injuries & poisonings	Disease Diagnoses	41270#1019	injuries & poisonings	0.714189	-0.00930406	-0.0245197	0.00589147
Enthesopathy	0.0101897	-0.00817156	0.0285611	0.858105	musculoskeletal	Disease Diagnoses	41270#726.1	musculoskeletal	0.50695	0.0162617	-0.00206687	0.0345599
Glaucoma	0.00842988	-0.0161522	0.0330295	0.945178	sense organs	Disease Diagnoses	41270#365	sense organs	0.649791	0.0169205	-0.00762125	0.0414062
Conjunctivitis, infectious	-0.00502054	-0.105888	0.0961666	0.982603	sense organs	Disease Diagnoses	41270#369.5	sense organs	0.942436	0.0200916	-0.0810898	0.120265
Vascular dementia	-0.0089524	-0.0765611	0.0587905	0.973559	mental disorders	Disease Diagnoses	41270#290.16	mental disorders	0.881336	-0.0227349	-0.0909141	0.0450067
Other diseases of respiratory system, NEC	0.00700709	-0.0104964	0.0245195	0.918824	respiratory	Disease Diagnoses	41270#519.8	respiratory	0.527686	0.0146018	-0.00287644	0.0320529
Chronic sinusitis	0.0180008	-0.0195424	0.0555885	0.883443	respiratory	Disease Diagnoses	41270#475	respiratory	0.979775	-0.00321066	-0.0408277	0.0342717
Redundant prepuce and phimosis/BXO	0.0158063	-0.0206936	0.0523487	0.903609	genitourinary	Disease Diagnoses	41270#604.1	genitourinary	0.436806	0.0349704	-0.00139771	0.071211
Fracture of humerus	0.0271685	-0.0151924	0.0695843	0.808415	injuries & poisonings	Disease Diagnoses	41270#803.1	injuries & poisonings	0.993407	-0.000907519	-0.0433223	0.041336
Jakob-Creutzfeldt disease	0.395658	0.0213207	0.771458	0.565188	neurological	Disease Diagnoses	41270#324.1	neurological	0.845863	0.148126	-0.220246	0.500838
Nevus, non-neoplastic	0.0236615	-0.0497463	0.0972361	0.947491	neoplasms	Disease Diagnoses	41270#217.1	neoplasms	0.991238	0.00257193	-0.0710696	0.0756882
Paraproteinemia	0.00580534	-0.0748142	0.0866225	0.977642	endocrine/metabolic	Disease Diagnoses	41270#270.32	endocrine/metabolic	0.850159	-0.0324355	-0.113778	0.0482856
Polycythemia, secondary	0.0391065	-0.0516543	0.130117	0.903609	hematopoietic	Disease Diagnoses	41270#289.8	hematopoietic	0.638736	0.0632192	-0.0270169	0.1526
Disorders of conjunctiva	0.0484355	-0.013953	0.11094	0.788381	sense organs	Disease Diagnoses	41270#372	sense organs	0.93768	0.0129951	-0.0493762	0.0749852
Nonspecific chest pain	-0.00497772	-0.016913	0.0069612	0.914598	circulatory system	Disease Diagnoses	41270#418	circulatory system	0.75682	0.00656561	-0.00536863	0.0184887
Benign neoplasm of brain, cranial nerves, meninges	0.0340237	-0.0268725	0.0950324	0.858105	neoplasms	Disease Diagnoses	41270#225.1	neoplasms	0.837269	-0.0263225	-0.0875598	0.0345644
Hydronephrosis	-0.00938983	-0.0437706	0.0250276	0.947491	genitourinary	Disease Diagnoses	41270#595	genitourinary	0.931911	0.00745336	-0.0269668	0.0417598
Facial nerve disorders [CN7]	-0.0351406	-0.0939001	0.0237321	0.835369	neurological	Disease Diagnoses	41270#352.2	neurological	0.174237	-0.0777105	-0.1374	-0.0183332
Subjective visual disturbances	0.0315251	-0.0316684	0.0948427	0.874555	sense organs	Disease Diagnoses	41270#368.9	sense organs	0.845863	0.0259251	-0.0371988	0.0886554
Injury, NOS	0.006259	-0.0156249	0.0281577	0.947491	injuries & poisonings	Disease Diagnoses	41270#1009	injuries & poisonings	0.971245	-0.00240226	-0.0243137	0.019465
Dental caries	-0.0325147	-0.0652052	0.000210246	0.626745	digestive	Disease Diagnoses	41270#521.1	digestive	0.722577	-0.0195502	-0.0524445	0.0132433
Peripheral enthesopathies and allied syndromes	0.0290068	0.00617095	0.0518589	0.386148	musculoskeletal	Disease Diagnoses	41270#726	musculoskeletal	0.163505	0.0300763	0.00733863	0.052765
Chronic ulcer of skin	-0.00376478	-0.0463112	0.0388368	0.977448	dermatologic	Disease Diagnoses	41270#707	dermatologic	0.27198	-0.0498178	-0.0927691	-0.00703529
Other headache syndromes	0.0346938	0.0138406	0.0555606	0.0822731	neurological	Disease Diagnoses	41270#339	neurological	0.311435	0.0231641	0.00238385	0.0439044
Other disorders of eyelids	-0.0223365	-0.0564521	0.0118154	0.808415	sense organs	Disease Diagnoses	41270#374	sense organs	0.883087	-0.0112916	-0.0455638	0.0228702
Other demyelinating diseases of central nervous system	0.0176998	-0.110032	0.14596	0.973559	neurological	Disease Diagnoses	41270#341	neurological	0.508287	-0.114097	-0.244685	0.0150987
Purpura and other hemorrhagic conditions	0.0103292	-0.126902	0.148125	0.977642	hematopoietic	Disease Diagnoses	41270#287	hematopoietic	0.746464	-0.0783612	-0.218103	0.0596742
Urinary incontinence	0.00957705	-0.0104184	0.0295844	0.883443	genitourinary	Disease Diagnoses	41270#599.4	genitourinary	0.686126	0.0128086	-0.00716609	0.0327478
Pilonidal cyst	-0.0377088	-0.131541	0.0564465	0.918824	dermatologic	Disease Diagnoses	41270#686.3	dermatologic	0.768357	0.0495757	-0.0444504	0.142716
Neuralgia, neuritis, and radiculitis NOS	0.0385679	-0.00683616	0.0840347	0.704363	symptoms	Disease Diagnoses	41270#766	symptoms	0.126942	0.0624463	0.01743	0.107254
Diplopia and disorders of binocular vision	0.0195506	-0.0406055	0.0798186	0.947491	sense organs	Disease Diagnoses	41270#368.2	sense organs	0.479243	-0.0557731	-0.116543	0.00466371
Malignant neoplasm of retroperitoneum and peritoneum	-0.0392971	-0.156027	0.0778825	0.947491	neoplasms	Disease Diagnoses	41270#159.4	neoplasms	0.552695	-0.0959235	-0.215158	0.0221059
Other disorders of stomach and duodenum	-0.0189631	-0.0481225	0.0102228	0.808415	digestive	Disease Diagnoses	41270#537	digestive	0.408703	-0.0291625	-0.0585174	0.000113055
Cervicalgia	0.0232314	-0.0174153	0.0639298	0.848413	symptoms	Disease Diagnoses	41270#761	symptoms	0.226755	0.0497261	0.00931957	0.0899688
Fracture of vertebral column without mention of spinal cord injury	-0.0242126	-0.0679299	0.0195663	0.858105	injuries & poisonings	Disease Diagnoses	41270#805	injuries & poisonings	0.69964	-0.0274541	-0.0715028	0.0164143
Other diseases of the teeth and supporting structures	-0.00183564	-0.0374876	0.0338567	0.982603	digestive	Disease Diagnoses	41270#525	digestive	0.993398	-0.00084842	-0.0365811	0.0347624
Prurigo and Lichen	0.0840119	0.0226167	0.145515	0.266951	dermatologic	Disease Diagnoses	41270#695.7	dermatologic	0.927938	0.0148975	-0.0463513	0.0757796
Benign neoplasm of parathyroid gland	0.0262445	-0.0589744	0.111689	0.947491	neoplasms	Disease Diagnoses	41270#227.2	neoplasms	0.885666	0.0270329	-0.0581934	0.111539
Celiac disease	0.000471829	-0.0420203	0.0430207	0.997296	digestive	Disease Diagnoses	41270#557.1	digestive	1.18728e-166	-0.642635	-0.688036	-0.597334
Precordial pain	-0.0349967	-0.0625185	-0.00745138	0.386148	circulatory system	Disease Diagnoses	41270#418.1	circulatory system	0.431444	-0.0269081	-0.054619	0.000732218
Angina pectoris	0.00229349	-0.0129276	0.0175206	0.973559	circulatory system	Disease Diagnoses	41270#411.3	circulatory system	0.845817	0.0064231	-0.00878981	0.0216171
Hemorrhage in early pregnancy	-0.025468	-0.0989245	0.0480851	0.944066	pregnancy complications	Disease Diagnoses	41270#636.3	pregnancy complications	0.83181	-0.033575	-0.10803	0.0403769
Calculus of kidney	-0.0140668	-0.0461823	0.0180813	0.901286	genitourinary	Disease Diagnoses	41270#594.1	genitourinary	0.310313	0.035742	0.00371128	0.0676723
Obstetrical/birth trauma	0.00808898	-0.0234993	0.0396957	0.953073	pregnancy complications	Disease Diagnoses	41270#665	pregnancy complications	0.787713	0.0160863	-0.0155941	0.0477008
Mycoses	0.136418	0.00295765	0.270338	0.592828	infectious diseases	Disease Diagnoses	41270#117	infectious diseases	0.391306	0.131709	0.000685801	0.260801
Other disorders of middle ear and mastoid	-0.0764011	-0.237659	0.085748	0.883636	sense organs	Disease Diagnoses	41270#385	sense organs	0.95683	-0.0262746	-0.190349	0.13529
Varicose veins	0.0540768	-0.0277787	0.136145	0.808415	circulatory system	Disease Diagnoses	41270#454	circulatory system	0.662262	0.0545092	-0.0269136	0.135257
Symptoms involving cardiovascular system	0.0313172	-0.0799123	0.142924	0.947491	circulatory system	Disease Diagnoses	41270#429.3	circulatory system	0.981033	0.00865945	-0.10303	0.119133
Inflammatory disease of breast	-0.00769916	-0.0839416	0.0687264	0.977285	genitourinary	Disease Diagnoses	41270#613.1	genitourinary	0.887663	0.0240394	-0.0523533	0.09986
Ulcer of esophagus	0.0051707	-0.022176	0.0325401	0.967956	digestive	Disease Diagnoses	41270#530.12	digestive	0.623159	0.0195926	-0.00770876	0.0468228
Otorrhea	0.0826746	-0.0443632	0.210182	0.808415	sense organs	Disease Diagnoses	41270#381.9	sense organs	0.91728	0.0335803	-0.0933739	0.15891
Non-Hodgkins lymphoma	-0.0173056	-0.0630988	0.0285533	0.931106	neoplasms	Disease Diagnoses	41270#202.2	neoplasms	0.00218522	-0.0978181	-0.144375	-0.051448
Fracture of hand or wrist	0.0314548	-0.000512919	0.0634546	0.635081	injuries & poisonings	Disease Diagnoses	41270#804	injuries & poisonings	0.460589	0.0300174	-0.00183183	0.0617679
Psychogenic disorder	-0.00650264	-0.110085	0.0974354	0.979374	mental disorders	Disease Diagnoses	41270#303.3	mental disorders	0.946753	-0.0201017	-0.124706	0.083478
Multiple sclerosis	0.0159434	-0.0374453	0.0694223	0.947491	neurological	Disease Diagnoses	41270#335	neurological	2.33968e-11	-0.206943	-0.261878	-0.152232
Osteoporosis NOS	0.0211669	0.00133529	0.0410101	0.551131	musculoskeletal	Disease Diagnoses	41270#743.11	musculoskeletal	0.92881	-0.00463623	-0.0244766	0.0151707
Bipolar	-0.0149695	-0.0706569	0.0408188	0.947491	mental disorders	Disease Diagnoses	41270#296.1	mental disorders	0.927938	0.0137221	-0.0420995	0.0692383
Other retinal disorders	0.00806074	-0.0447321	0.0609382	0.973559	sense organs	Disease Diagnoses	41270#362	sense organs	0.95683	-0.00854607	-0.0615411	0.0441794
Myopathy	0.0394964	-0.0654732	0.144801	0.931106	neurological	Disease Diagnoses	41270#359.2	neurological	0.815293	-0.050058	-0.156211	0.0550723
Fracture of patella	0.0442511	-0.0258842	0.114534	0.816925	injuries & poisonings	Disease Diagnoses	41270#800.4	injuries & poisonings	0.883229	0.0229435	-0.0470961	0.0924958
Other disorders of lipoid metabolism	0.0800823	-0.0264965	0.186987	0.799494	endocrine/metabolic	Disease Diagnoses	41270#277.5	endocrine/metabolic	0.743498	0.0597831	-0.0461627	0.164553
Diseases of the larynx and vocal cords	0.0627045	0.0128104	0.112673	0.400998	respiratory	Disease Diagnoses	41270#473	respiratory	0.232042	0.0604792	0.0110278	0.109679
Diabetes or abnormal glucose tolerance complicating pregnancy	0.016662	-0.136177	0.169888	0.976199	pregnancy complications	Disease Diagnoses	41270#649.1	pregnancy complications	0.719309	-0.0938477	-0.250396	0.0606359
Cancer of major salivary glands	-0.136816	-0.299492	0.0268596	0.710137	neoplasms	Disease Diagnoses	41270#145.3	neoplasms	0.227028	-0.207958	-0.3777	-0.0402817
Pyelonephritis	0.0119936	-0.0328578	0.0569083	0.947491	genitourinary	Disease Diagnoses	41270#590	genitourinary	0.828513	0.0204341	-0.0243796	0.0650515
Hyperplasia of prostate	-0.0107773	-0.0275266	0.00597729	0.808415	genitourinary	Disease Diagnoses	41270#600	genitourinary	0.38399	0.0170759	0.000350805	0.0337824
Peripheral or central vertigo	0.0190211	-0.0465852	0.0847598	0.947491	sense organs	Disease Diagnoses	41270#386.2	sense organs	0.994236	0.00107158	-0.0647188	0.0664452
Chronic inflammatory pelvic disease	-0.0686101	-0.169934	0.0330487	0.805116	genitourinary	Disease Diagnoses	41270#614.32	genitourinary	0.643795	-0.0719145	-0.175278	0.0305088
Althete's foot	0.194137	0.0448999	0.343941	0.350809	infectious diseases	Disease Diagnoses	41270#110.12	infectious diseases	0.649791	0.100884	-0.0462431	0.245655
Irritable Bowel Syndrome	0.0121585	-0.0101016	0.0344337	0.859337	digestive	Disease Diagnoses	41270#564.1	digestive	0.237695	0.0270699	0.00487532	0.0492188
Chronic tonsillitis and adenoiditis	0.0205505	-0.0438349	0.0850703	0.947491	respiratory	Disease Diagnoses	41270#474.2	respiratory	0.868357	0.0232328	-0.0411889	0.0872497
Other disorders of soft tissues	0.0174139	-0.00665385	0.0414993	0.805116	musculoskeletal	Disease Diagnoses	41270#729	musculoskeletal	0.760817	0.0131073	-0.0109279	0.0370884
Graves' disease	0.119697	0.0367384	0.202841	0.209484	endocrine/metabolic	Disease Diagnoses	41270#242.1	endocrine/metabolic	0.000407499	-0.195773	-0.280754	-0.111324
Neoplasm of uncertain behavior	0.0539553	-0.000606435	0.108606	0.631359	neoplasms	Disease Diagnoses	41270#199	neoplasms	0.406991	0.0538343	-0.000334025	0.107702
Unstable angina (intermediate coronary syndrome)	0.0140555	-0.0142369	0.0423718	0.874803	circulatory system	Disease Diagnoses	41270#411.1	circulatory system	0.661643	0.0191532	-0.00908632	0.0473167
Occlusion and stenosis of precerebral arteries	-0.0060522	-0.0552102	0.0431784	0.975442	circulatory system	Disease Diagnoses	41270#433.1	circulatory system	0.616984	-0.0363841	-0.0859529	0.0129556
Spirochetal infection	0.101397	-0.163165	0.367938	0.926985	infectious diseases	Disease Diagnoses	41270#130	infectious diseases	0.4876	0.231451	-0.0266381	0.481345
Ulcerative colitis (chronic)	0.00322718	-0.0694886	0.0761135	0.985149	digestive	Disease Diagnoses	41270#555.21	digestive	0.978342	0.00650795	-0.0664716	0.0789705
Parkinson's disease	-0.0134446	-0.0551392	0.0283012	0.947491	neurological	Disease Diagnoses	41270#332	neurological	0.537644	-0.0346089	-0.0766279	0.00724677
Cerebrovascular disease	0.00456289	-0.0339207	0.0430906	0.976199	circulatory system	Disease Diagnoses	41270#433	circulatory system	0.764777	-0.0208086	-0.0594751	0.0177183
Malignant neoplasm of small intestine, including duodenum	0.0612098	-0.0611622	0.184018	0.874555	neoplasms	Disease Diagnoses	41270#159.2	neoplasms	0.845863	0.0503391	-0.0716621	0.170809
Irregular menstrual cycle	0.0106198	-0.0426745	0.0639988	0.96564	genitourinary	Disease Diagnoses	41270#626.13	genitourinary	0.930509	0.0119591	-0.0414244	0.0650684
Other derangement of joint	-0.0337752	-0.0804264	0.0129482	0.805116	musculoskeletal	Disease Diagnoses	41270#742.9	musculoskeletal	0.614608	-0.0348238	-0.0819263	0.0120754
Intestinal disaccharidase deficiencies and disaccharide malabsorption	0.0499007	-0.0724892	0.172745	0.918824	endocrine/metabolic	Disease Diagnoses	41270#271.3	endocrine/metabolic	0.835144	-0.0542043	-0.178141	0.0683546
Orthostatic hypotension	0.0196095	-0.0147728	0.0540265	0.848413	circulatory system	Disease Diagnoses	41270#458.1	circulatory system	0.862692	-0.0128012	-0.0472816	0.0215674
Fracture of tibia and fibula	-0.0198967	-0.0617813	0.0220452	0.883443	injuries & poisonings	Disease Diagnoses	41270#800.3	injuries & poisonings	0.835144	-0.018688	-0.0608323	0.0232905
Eye infection, viral	0.133204	-0.0052419	0.272157	0.653379	sense organs	Disease Diagnoses	41270#369.2	sense organs	0.520579	0.113871	-0.0225371	0.248218
Cancer of oropharynx	-0.0792068	-0.191668	0.0337136	0.805116	neoplasms	Disease Diagnoses	41270#149.1	neoplasms	0.387052	-0.117017	-0.232555	-0.00257414
Seborrheic keratosis	-0.0277822	-0.0588653	0.00333067	0.668902	dermatologic	Disease Diagnoses	41270#702.2	dermatologic	0.743191	-0.0177884	-0.0490406	0.0133732
Conjunctivitis, noninfectious	-0.227006	-0.52747	0.0769976	0.799494	sense organs	Disease Diagnoses	41270#371.2	sense organs	0.689498	-0.199245	-0.516564	0.110605
Other specified gastritis	0.0118883	-0.00679374	0.0305808	0.808415	digestive	Disease Diagnoses	41270#535.8	digestive	0.955725	-0.00315446	-0.0218513	0.0155109
Pelvic inflammatory disease, NOS	0.0160604	-0.103677	0.136206	0.973559	genitourinary	Disease Diagnoses	41270#614.33	genitourinary	0.880498	-0.0405285	-0.1618	0.0794014
Arrhythmia (cardiac) NOS	0.015476	-0.0357585	0.0667901	0.947491	circulatory system	Disease Diagnoses	41270#427.5	circulatory system	0.436494	0.0490317	-0.00193986	0.0997376
Benign neoplasm of thyroid glands	0.00715358	-0.107524	0.122247	0.979374	neoplasms	Disease Diagnoses	41270#226	neoplasms	0.513076	0.097365	-0.0164489	0.209782
Fracture of clavicle or scapula	0.00424668	-0.0527103	0.0613108	0.977642	injuries & poisonings	Disease Diagnoses	41270#803.3	injuries & poisonings	0.833132	-0.0257555	-0.0831166	0.0313013
Superficial injury without mention of infection	-0.00859504	-0.0330956	0.0159237	0.941303	injuries & poisonings	Disease Diagnoses	41270#915	injuries & poisonings	0.661643	0.016519	-0.00796582	0.0409472
Ingrowing nail	0.028527	-0.0418339	0.0990428	0.918824	dermatologic	Disease Diagnoses	41270#703.1	dermatologic	0.955725	0.0118262	-0.0586368	0.0818031
Atopic/contact dermatitis due to other or unspecified	0.0105499	-0.0208423	0.0419727	0.947491	dermatologic	Disease Diagnoses	41270#939	dermatologic	0.63481	-0.0222546	-0.0537817	0.00917998
Generalized anxiety disorder	0.0680785	-0.056119	0.192727	0.859337	mental disorders	Disease Diagnoses	41270#300.11	mental disorders	0.95978	0.0194306	-0.104946	0.142271
Partial epilepsy	-0.0389976	-0.142048	0.0644173	0.931106	neurological	Disease Diagnoses	41270#345.12	neurological	0.806302	-0.0504514	-0.155136	0.0532467
Carcinoma in situ of skin	-0.123453	-0.180198	-0.0666024	0.00307372	neoplasms	Disease Diagnoses	41270#172.3	neoplasms	0.00219515	-0.12209	-0.180286	-0.0641766
Other disorders of metabolism	0.00728789	-0.0371355	0.051772	0.973559	endocrine/metabolic	Disease Diagnoses	41270#277	endocrine/metabolic	0.388076	-0.0454066	-0.0902079	-0.000788761
Hyperparathyroidism	0.0251879	-0.0296942	0.0801625	0.892373	endocrine/metabolic	Disease Diagnoses	41270#252.1	endocrine/metabolic	0.963162	-0.00736224	-0.0624141	0.047403
Polycythemia vera	0.0213667	-0.0727312	0.115736	0.961181	neoplasms	Disease Diagnoses	41270#200.1	neoplasms	0.888269	0.0293432	-0.0648157	0.122606
Secondary malignant neoplasm of liver	-0.0246193	-0.054082	0.00486977	0.714412	neoplasms	Disease Diagnoses	41270#198.4	neoplasms	0.147039	-0.0402935	-0.069998	-0.0106692
Anomalies of tooth position/malocclusion	-0.000548745	-0.110509	0.109812	0.997526	digestive	Disease Diagnoses	41270#524.3	digestive	0.804826	-0.0541171	-0.165751	0.0564087
Vitamin D deficiency	-0.0364759	-0.0763511	0.00344989	0.664546	endocrine/metabolic	Disease Diagnoses	41270#261.4	endocrine/metabolic	0.670814	-0.026344	-0.0665229	0.0136854
Cystitis	-0.0391835	-0.0804932	0.00218031	0.659005	genitourinary	Disease Diagnoses	41270#592.1	genitourinary	0.78096	-0.0213803	-0.0629961	0.0200738
Renal colic	-0.0125923	-0.0601078	0.0349975	0.947491	genitourinary	Disease Diagnoses	41270#594.8	genitourinary	0.35386	0.0498013	0.00246842	0.0969076
Unspecified diffuse connective tissue disease	0.0276844	-0.00826214	0.0636704	0.788479	dermatologic	Disease Diagnoses	41270#709.7	dermatologic	0.989851	0.00166468	-0.0342956	0.0375017
Calculus of lower urinary tract	-0.0537717	-0.114616	0.00719145	0.673097	genitourinary	Disease Diagnoses	41270#594.2	genitourinary	0.981903	-0.00394407	-0.0651828	0.0569315
Syncope and collapse	0.00821719	-0.00993818	0.0263822	0.892373	symptoms	Disease Diagnoses	41270#788	symptoms	0.92881	-0.00425176	-0.0224248	0.0138918
Pelvic peritoneal adhesions, female (postoperative) (postinfection)	-0.00499871	-0.0446222	0.0346713	0.973902	genitourinary	Disease Diagnoses	41270#614.1	genitourinary	0.897679	0.0117365	-0.0279454	0.0512692
Pneumococcal pneumonia	-0.00172541	-0.0209356	0.0174953	0.977448	respiratory	Disease Diagnoses	41270#480.11	respiratory	0.463012	-0.0181389	-0.0374131	0.00110206
Hemorrhage or hematoma complicating a procedure	-0.0231773	-0.0479114	0.00157547	0.664546	injuries & poisonings	Disease Diagnoses	41270#850	injuries & poisonings	0.952943	-0.00458948	-0.0293973	0.0201612
Retinal vascular changes and abnomalities	0.035189	-0.0177118	0.0881723	0.807273	sense organs	Disease Diagnoses	41270#362.4	sense organs	0.912548	-0.014456	-0.0675444	0.0383637
Bone cancer	0.0773432	-0.079846	0.235238	0.874803	neoplasms	Disease Diagnoses	41270#170.1	neoplasms	0.979775	-0.0133014	-0.171701	0.142724
Otitis externa	0.0153025	-0.0627078	0.0935066	0.967088	sense organs	Disease Diagnoses	41270#380.1	sense organs	0.979775	0.0066343	-0.0716147	0.0842856
Diarrhea	0.0131194	-0.0531619	0.0795377	0.966183	digestive	Disease Diagnoses	41270#561.1	digestive	0.508287	-0.0589733	-0.126005	0.00765706
Complication of internal orthopedic device	0.00744801	-0.021772	0.036694	0.953073	injuries & poisonings	Disease Diagnoses	41270#858	injuries & poisonings	0.856644	-0.0113205	-0.0406207	0.0178996
Corns and callosities	0.0148358	-0.0885507	0.118556	0.973559	dermatologic	Disease Diagnoses	41270#700	dermatologic	0.937491	-0.0217485	-0.12603	0.0815243
Abnormality of organs and soft tissues of pelvis complicating pregnancy, childbirth, or the puerperium	-0.0533794	-0.117278	0.0105888	0.714412	pregnancy complications	Disease Diagnoses	41270#654.1	pregnancy complications	0.748897	-0.0362943	-0.10114	0.028175
Cholesteatoma	0.00691703	-0.077168	0.0912287	0.977642	sense organs	Disease Diagnoses	41270#385.3	sense organs	0.835144	0.0373125	-0.0467257	0.120641
Other and unspecified coagulation defects	0.0217772	-0.0687563	0.112566	0.954279	hematopoietic	Disease Diagnoses	41270#286.7	hematopoietic	0.492099	-0.0826714	-0.174621	0.0085451
Conductive hearing loss	-0.0116823	-0.101447	0.0783489	0.973559	sense organs	Disease Diagnoses	41270#389.2	sense organs	0.527456	-0.0760524	-0.167299	0.0144695
Gastric ulcer	0.00826897	-0.0197615	0.0363235	0.947491	digestive	Disease Diagnoses	41270#531.2	digestive	0.976416	0.00271519	-0.0253364	0.0306927
Corneal degenerations	0.0463887	-0.0196483	0.11255	0.805116	sense organs	Disease Diagnoses	41270#364.4	sense organs	0.663473	0.0438081	-0.021897	0.109076
Frequency of urination and polyuria	0.0379731	0.00662581	0.0693505	0.439267	genitourinary	Disease Diagnoses	41270#599.5	genitourinary	0.0388612	0.0509043	0.0197867	0.0819256
Posttraumatic stress disorder	-0.0257596	-0.138965	0.087898	0.960937	mental disorders	Disease Diagnoses	41270#300.9	mental disorders	0.953606	0.0202823	-0.0936821	0.132994
Degenerative disease of the spinal cord	-0.0112179	-0.0541693	0.0317918	0.95148	neurological	Disease Diagnoses	41270#334	neurological	0.928275	0.0101745	-0.0328437	0.0530124
Disorders of menstruation and other abnormal bleeding from female genital tract	-0.00442988	-0.0564008	0.0476233	0.977642	genitourinary	Disease Diagnoses	41270#626	genitourinary	0.481466	-0.0479943	-0.100509	0.0042741
Other disorders of bladder	0.00449983	-0.0163346	0.025347	0.962797	genitourinary	Disease Diagnoses	41270#596	genitourinary	0.664164	0.0138939	-0.00691521	0.0346636
Anemia of chronic disease	0.0441098	-0.0442215	0.132671	0.874555	hematopoietic	Disease Diagnoses	41270#285.2	hematopoietic	0.989949	-0.00364797	-0.0923036	0.0842522
Acute appendicitis	0.0490977	0.00407448	0.0941838	0.537197	digestive	Disease Diagnoses	41270#540.11	digestive	0.903139	-0.0129226	-0.0580522	0.0320161
Emphysema	0.0189768	-0.0175123	0.0555057	0.866154	respiratory	Disease Diagnoses	41270#496.1	respiratory	0.832453	0.0164045	-0.0200507	0.0527308
Fracture of ankle and foot	0.00726667	-0.0393254	0.0539279	0.973559	injuries & poisonings	Disease Diagnoses	41270#801	injuries & poisonings	0.963162	-0.00670782	-0.0534737	0.0398504
Cervical intraepithelial neoplasia [CIN] [Cervical dysplasia]	0.00286083	-0.0446004	0.0503885	0.980015	neoplasms	Disease Diagnoses	41270#180.3	neoplasms	0.927938	-0.0117456	-0.0594389	0.0357336
Contracture of joint	-0.0956269	-0.210144	0.0193558	0.716864	musculoskeletal	Disease Diagnoses	41270#739	musculoskeletal	0.821943	-0.0545306	-0.17132	0.061039
Disorders of adrenal glands	0.0920874	-0.0204739	0.205007	0.733697	endocrine/metabolic	Disease Diagnoses	41270#255	endocrine/metabolic	0.719309	0.0670814	-0.044665	0.177523
Congenital deficiency of other clotting factors (including factor VII)	0.0349706	-0.0712972	0.141583	0.947491	hematopoietic	Disease Diagnoses	41270#286.12	hematopoietic	0.650901	-0.0738969	-0.181744	0.0329288
Cerebral aneurysm	-0.0450748	-0.132713	0.0428207	0.868917	circulatory system	Disease Diagnoses	41270#433.5	circulatory system	0.993648	0.00162857	-0.0866838	0.0891941
Amyloidosis	-0.0829281	-0.201955	0.0365718	0.805116	endocrine/metabolic	Disease Diagnoses	41270#270.33	endocrine/metabolic	0.513076	-0.103531	-0.225612	0.0172769
Primary open angle glaucoma	0.0212808	-0.0218533	0.0644697	0.874803	sense organs	Disease Diagnoses	41270#365.11	sense organs	0.835401	0.0186223	-0.0244531	0.0615165
Acute gastritis	0.0517229	-0.000996491	0.104525	0.637056	digestive	Disease Diagnoses	41270#535.1	digestive	0.095188	0.0759674	0.0237996	0.127851
Intestinal helminthiases	-0.028653	-0.190279	0.13388	0.973559	infectious diseases	Disease Diagnoses	41270#134.1	infectious diseases	0.981363	0.0109385	-0.152427	0.171703
Visual field defects	-0.0783922	-0.155532	-0.0010532	0.602464	sense organs	Disease Diagnoses	41270#368.4	sense organs	0.184017	-0.101661	-0.180524	-0.0233288
Disorders of magnesium metabolism	-0.000738136	-0.0523862	0.0509928	0.99558	endocrine/metabolic	Disease Diagnoses	41270#275.3	endocrine/metabolic	0.964461	0.0066212	-0.0451291	0.0581119
Aspergillosis	0.121664	-0.00503116	0.248785	0.655204	infectious diseases	Disease Diagnoses	41270#117.4	infectious diseases	0.993398	0.00357742	-0.123352	0.128933
Diseases of lips	-0.0199296	-0.0888598	0.0491563	0.947491	digestive	Disease Diagnoses	41270#528.5	digestive	0.969077	-0.00813341	-0.077509	0.0607848
Pyogenic granuloma	-0.0697184	-0.170618	0.0315355	0.805116	dermatologic	Disease Diagnoses	41270#686.4	dermatologic	0.868296	-0.0371241	-0.139566	0.0643565
Disturbances in tooth eruption	-0.00187695	-0.0474358	0.0437496	0.985868	digestive	Disease Diagnoses	41270#520.2	digestive	0.858999	-0.017267	-0.0630936	0.028364
Atherosclerosis of the extremities	0.0135066	-0.0440638	0.0711756	0.958347	circulatory system	Disease Diagnoses	41270#440.2	circulatory system	0.661449	-0.039363	-0.0974186	0.0183779
Other open wound of head and face	0.0200785	-0.014273	0.0544661	0.83724	injuries & poisonings	Disease Diagnoses	41270#870.3	injuries & poisonings	0.892273	-0.0104589	-0.0448919	0.0238623
Polycystic ovaries	0.00574698	-0.120396	0.132283	0.984081	endocrine/metabolic	Disease Diagnoses	41270#256.4	endocrine/metabolic	0.956302	0.0210191	-0.10614	0.146587
Femoral hernia	0.00812582	-0.0603374	0.0767352	0.976199	digestive	Disease Diagnoses	41270#550.3	digestive	0.941361	0.0137758	-0.0547894	0.081883
Extrapyramidal disease and abnormal movement disorders	0.0460397	-0.0263735	0.118611	0.808845	neurological	Disease Diagnoses	41270#333	neurological	0.879837	-0.0246555	-0.0974692	0.0476629
Cataplexy and narcolepsy	-0.0973621	-0.351777	0.159479	0.928246	neurological	Disease Diagnoses	41270#347	neurological	0.926996	0.0636622	-0.194297	0.314934
Tuberculosis	0.0610554	-0.090777	0.213569	0.918824	bacterial infection	Disease Diagnoses	41270#10	bacterial infection	0.671515	0.0979665	-0.0526539	0.246133
Other dyschromia	-0.0204008	-0.0811721	0.04049	0.947491	dermatologic	Disease Diagnoses	41270#694.2	dermatologic	0.99617	0.000704427	-0.0603518	0.0614013
Agorophobia, social phobia, and panic disorder	-0.00883578	-0.0629058	0.0453283	0.973559	mental disorders	Disease Diagnoses	41270#300.12	mental disorders	0.953606	-0.00990338	-0.0642512	0.0441635
Cancer of other female genital organs (excluding uterus and ovary)	0.0207142	-0.0850939	0.126871	0.967088	neoplasms	Disease Diagnoses	41270#184.2	neoplasms	0.881336	0.0350816	-0.0707691	0.139816
Aneurysm of other specified artery	0.0961545	-0.0126229	0.205265	0.673097	circulatory system	Disease Diagnoses	41270#442.8	circulatory system	0.54336	0.0874705	-0.0201625	0.193864
Skull and face fracture and other intercranial injury	-0.0117145	-0.0491443	0.0257615	0.947491	injuries & poisonings	Disease Diagnoses	41270#819	injuries & poisonings	0.513076	-0.0325884	-0.0703049	0.00499801
Other conditions of brain, NOS	0.0144069	-0.0583802	0.087358	0.966183	neurological	Disease Diagnoses	41270#348.9	neurological	0.931911	-0.015841	-0.0890534	0.0568601
Early or threatened labor; hemorrhage in early pregnancy	-0.0314974	-0.0993075	0.0363918	0.889813	pregnancy complications	Disease Diagnoses	41270#636	pregnancy complications	0.795346	-0.03439	-0.103206	0.0340029
Other acquired deformities of limbs	0.0116892	-0.0292388	0.052669	0.947491	musculoskeletal	Disease Diagnoses	41270#736	musculoskeletal	0.89206	-0.0125123	-0.0535862	0.0284017
Symptoms and disorders of the joints	0.0235297	-0.0315879	0.0787428	0.904304	musculoskeletal	Disease Diagnoses	41270#741	musculoskeletal	0.809626	-0.0265503	-0.0819961	0.0286109
Pituitary hypofunction	-0.00154196	-0.116514	0.113859	0.996134	endocrine/metabolic	Disease Diagnoses	41270#253.2	endocrine/metabolic	0.963162	-0.0155845	-0.131656	0.0992117
Acidosis	0.0285368	-0.0117823	0.0689046	0.805116	endocrine/metabolic	Disease Diagnoses	41270#276.41	endocrine/metabolic	0.991238	0.00145869	-0.0388914	0.0416514
Disorders of external ear	-0.00799752	-0.0802339	0.0644041	0.976199	sense organs	Disease Diagnoses	41270#380	sense organs	0.989949	0.00319413	-0.0693396	0.0752171
[truncated: 1,255 more rows]

## Sheet: VITE
varName	beta noHLA	lower noHLA	upper noHLA	Pfdr noHLA	category2	category1	ID code	category3	Pfrd HLA	beta HLA	lower HLA	upper HLA
Blood clot, DVT, bronchitis, emphysema, asthma, rhinitis, eczema, allergy diagnosed by doctor: Hayfever, allergic rhinitis or eczema	-0.0219458	-0.030067	-0.0138252	1.2817e-05	Medical conditions	health and medical history	6152#9	general	0.00194109	-0.0172313	-0.0253547	-0.00910914
Number of self-reported non-cancer illnesses	0.0160814	0.00959878	0.022564	0.000110814	Medical conditions	health and medical history	135	general	1.80289e-07	0.0200351	0.0135525	0.0265176
Blood clot, DVT, bronchitis, emphysema, asthma, rhinitis, eczema, allergy diagnosed by doctor	0.0165893	0.00927128	0.0239078	0.00073841	Medical conditions	health and medical history	6152#100	general	0.812926	0.00362123	-0.0036957	0.0109387
Blood clot, DVT, bronchitis, emphysema, asthma, rhinitis, eczema, allergy diagnosed by doctor: Asthma	-0.0133942	-0.024063	-0.00272587	0.294662	Medical conditions	health and medical history	6152#8	general	0.000231199	0.0254905	0.014829	0.0361506
Blood clot, DVT, bronchitis, emphysema, asthma, rhinitis, eczema, allergy diagnosed by doctor: Blood clot in the leg (DVT)	0.0184264	-0.00569817	0.0425498	0.720742	Medical conditions	health and medical history	6152#5	general	0.962763	-0.00308505	-0.0272101	0.0210263
Vascular/heart problems diagnosed by doctor	-0.00359075	-0.0113558	0.00417427	0.891045	Medical conditions	health and medical history	6150#100	general	0.00647226	-0.0151599	-0.0229215	-0.00739826
Blood clot, DVT, bronchitis, emphysema, asthma, rhinitis, eczema, allergy diagnosed by doctor: Emphysema/chronic bronchitis	0.0118826	-0.0153927	0.0391563	0.899052	Medical conditions	health and medical history	6152#6	general	0.520602	0.0250531	-0.00218745	0.0522775
Vascular/heart problems diagnosed by doctor: High blood pressure	0.000124568	-0.00779013	0.00803922	0.996948	Medical conditions	health and medical history	6150#4	general	0.0766724	0.0121699	0.0042589	0.0200805
Histology of cancer tumour: Basal cell carcinoma, NOS	-0.144105	-0.160705	-0.12751	3.41108e-62	Cancer register	health and medical history	40011#8090	Epithelial	1.62798e-59	-0.141505	-0.158166	-0.124855
Behaviour of cancer tumour: Malignant, primary site	-0.064487	-0.0741106	-0.0548653	1.01574e-36	Cancer register	health and medical history	40012#3	general	7.63334e-32	-0.0600866	-0.0697174	-0.0504587
Cancer code, self-reported: basal cell carcinoma	-0.195398	-0.230907	-0.159898	1.7294e-24	Medical conditions	health and medical history	20001#1061	Skin Cancer	4.2794e-21	-0.182002	-0.217744	-0.146302
Number of self-reported cancers	-0.0602041	-0.0725553	-0.047853	4.47383e-19	Medical conditions	health and medical history	134	general	3.33876e-09	-0.0421892	-0.0545477	-0.0298308
Cancer code, self-reported: malignant melanoma	-0.16872	-0.207124	-0.130323	2.01303e-15	Medical conditions	health and medical history	20001#1059	Skin Cancer	5.41832e-10	-0.137011	-0.175599	-0.0984683
Cancer diagnosed by doctor	-0.0517931	-0.0646036	-0.0389844	5.57007e-13	Medical conditions	health and medical history	2453	general	1.0867e-06	-0.0374382	-0.0502557	-0.024625
Histology of cancer tumour: Superficial spreading melanoma	-0.170859	-0.215669	-0.126056	1.69151e-11	Cancer register	health and medical history	40011#8743	Epithelial	3.33211e-07	-0.136723	-0.181773	-0.0917343
Histology of cancer tumour: Squamous cell carcinoma	-0.08051	-0.108186	-0.0528381	1.54332e-06	Cancer register	health and medical history	40011#8070	Epithelial	0.0350505	-0.0467091	-0.0744202	-0.0190186
Cancer code, self-reported: skin cancer	-0.157112	-0.218433	-0.095806	4.99177e-05	Medical conditions	health and medical history	20001#1003	Skin Cancer	0.00844359	-0.117771	-0.17932	-0.0563275
Histology of cancer tumour: Nodular melanoma	-0.292243	-0.425564	-0.158965	0.00135318	Cancer register	health and medical history	40011#8721	Epithelial	6.27386e-05	-0.342116	-0.477509	-0.207333
Histology of cancer tumour: Malignant melanoma, NOS	-0.113713	-0.16631	-0.0611227	0.00164144	Cancer register	health and medical history	40011#8720	Hematologic	0.00194109	-0.11198	-0.164798	-0.0592411
Behaviour of cancer tumour: Carcinoma in situ	-0.0395065	-0.0602383	-0.0187765	0.0122322	Cancer register	health and medical history	40012#2	general	0.363674	-0.0227081	-0.0434585	-0.0019685
Cancer code, self-reported: squamous cell carcinoma	-0.182416	-0.28283	-0.0820365	0.0225622	Medical conditions	health and medical history	20001#1062	Skin Cancer	0.205551	-0.131659	-0.232576	-0.0310355
Cancer code, self-reported: rodent ulcer	-0.134363	-0.224951	-0.043803	0.136885	Medical conditions	health and medical history	20001#1073	Skin Cancer	0.0119136	-0.169938	-0.261081	-0.0790372
Histology of cancer tumour: Bowen disease	-0.111887	-0.193517	-0.0302826	0.205901	Cancer register	health and medical history	40011#8081	Epithelial	0.145193	-0.114929	-0.196904	-0.0331413
Cancer code, self-reported: small intestine/small bowel cancer	-0.2198	-0.380801	-0.0588767	0.209431	Medical conditions	health and medical history	20001#1019	Gastrointestinal Cancer	0.863303	-0.0632058	-0.224587	0.097494
Histology of cancer tumour: Multifocal superficial basal cell carcinoma	-0.162946	-0.283763	-0.0421655	0.219587	Cancer register	health and medical history	40011#8091	Epithelial	0.344202	-0.13763	-0.259208	-0.0164815
Histology of cancer tumour: Hodgkin lymphoma, nodular lymphocyte predominance	0.459818	-0.0839039	1.002	0.642044	Cancer register	health and medical history	40011#9659	Hematologic	0.934091	-0.117129	-0.668384	0.425733
Histology of cancer tumour: Squamous intraepithelial neoplasia, grade III	-0.0377504	-0.089039	0.0135427	0.73055	Cancer register	health and medical history	40011#8077	Epithelial	0.923133	0.0126837	-0.0385711	0.063878
Histology of cancer tumour: Malignant lymphoma, large B-cell, diffuse	-0.0624289	-0.1497	0.0248199	0.737816	Cancer register	health and medical history	40011#9680	Hematologic	0.0642952	-0.138014	-0.225754	-0.0504939
Histology of cancer tumour: Hodgkin lymphoma, nodular sclerosis	0.138133	-0.0898301	0.366019	0.790275	Cancer register	health and medical history	40011#9663	Hematologic	0.854616	0.0939734	-0.133823	0.320716
Histology of cancer tumour: Carcinoma, NOS	-0.0208316	-0.0574269	0.0157603	0.824985	Cancer register	health and medical history	40011#8010	Epithelial	0.782029	-0.020092	-0.0567361	0.0165174
Histology of cancer tumour: Follicular lymphoma, grade 2	-0.122185	-0.346037	0.101482	0.839722	Cancer register	health and medical history	40011#9691	Hematologic	0.847422	-0.0965091	-0.321611	0.127173
Histology of cancer tumour: Endometrioid carcinoma	-0.0262543	-0.0899852	0.0374626	0.911198	Cancer register	health and medical history	40011#8380	Epithelial	0.704278	-0.040974	-0.104887	0.0228323
Histology of cancer tumour: Chronic lymphocytic leukemia/small lymphocytic lymphoma	0.0368826	-0.0572859	0.131028	0.913536	Cancer register	health and medical history	40011#9823	Hematologic	0.502029	0.0886999	-0.00518968	0.182407
Histology of cancer tumour: Adenocarcinoma, NOS	0.00597341	-0.0123323	0.0242786	0.921649	Cancer register	health and medical history	40011#8140	Epithelial	0.554156	0.0161554	-0.00211564	0.0344204
Histology of cancer tumour: Non-small cell carcinoma	0.0460209	-0.0962668	0.188239	0.923976	Cancer register	health and medical history	40011#8046	Epithelial	0.743255	0.0850399	-0.0570028	0.226627
Histology of cancer tumour: Malignant lymphoma, non-Hodgkin	-0.0421054	-0.183417	0.0991608	0.932758	Cancer register	health and medical history	40011#9591	Hematologic	0.367782	-0.154068	-0.296444	-0.0122774
Histology of cancer tumour: Paget disease, mammary	0.116585	-0.29197	0.524358	0.939011	Cancer register	health and medical history	40011#8540	Epithelial	0.61847	0.3252	-0.0810687	0.72923
Histology of cancer tumour: Adenocarcinoma, intestinal type	0.0559936	-0.140504	0.252453	0.939011	Cancer register	health and medical history	40011#8144	Epithelial	0.68044	0.136053	-0.0595401	0.330932
Histology of cancer tumour: Papillary carcinoma, follicular variant	-0.0401928	-0.277686	0.197236	0.959094	Cancer register	health and medical history	40011#8340	Epithelial	0.929237	0.0548519	-0.182898	0.291282
Histology of cancer tumour: Follicular lymphoma, NOS	-0.0226968	-0.157236	0.1118	0.959447	Cancer register	health and medical history	40011#9690	Hematologic	0.277375	-0.164109	-0.299607	-0.0291363
Cancer code, self-reported: cervical cancer	-0.00393754	-0.0580087	0.0501296	0.984027	Medical conditions	health and medical history	20001#1041	Genital Tract Cancer	0.934784	0.0112388	-0.0428426	0.0652488
Histology of cancer tumour: Adrenal cortical carcinoma	-0.0220056	-0.613841	0.569959	0.996948	Cancer register	health and medical history	40011#8370	Epithelial	0.906261	-0.178672	-0.7816	0.413284
[truncated: 3,212 more rows]

## Sheet: PSO
varName	beta noHLA	lower noHLA	upper noHLA	Pfdr noHLA	category2	category1	ID code	category3	Pfrd HLA	beta HLA	lower HLA	upper HLA
[truncated: 3,254 more rows]

[truncated: 8 more sheets: CEL, T1D, SLE, PSC, RA, MS, MG, JIA]
